1 Dissection of complex, fitness-related traits in multiple *Drosophila* mapping  
2 populations offers insight into the genetic control of stress resistance

3  
4

5 Elizabeth R. Everman, Casey L. McNeil, Jennifer L. Hackett, Clint L. Bain, Stuart J. Macdonald

6

7 Department of Molecular Biosciences, University of Kansas, 1200 Sunnyside Avenue, Lawrence,  
8 Kansas 66045, USA.

9

10

11

12

13

14

15

16

17

18

19

20

21

22

23

24

25

26

27

28 Running title: Genetic dissection of fitness traits

29

30 Keywords: Starvation resistance, triglyceride level, DSPR, DGRP, MPP

31

32 Corresponding author:

33

34 Stuart Macdonald

35 Department of Molecular Biosciences

36 4043 Haworth Hall

37 1200 Sunnyside Avenue

38 University of Kansas

39 Lawrence, KS 66045

40

41 Tel: 785-864-5362

42 Email: sjmac@ku.edu

## 43 Abstract

44

45 We leverage two complementary *Drosophila melanogaster* mapping panels to genetically dissect  
46 starvation resistance, an important fitness trait. Using >1600 genotypes from the multiparental  
47 *Drosophila* Synthetic Population Resource (DSPR) we map numerous starvation stress QTL that  
48 collectively explain a substantial fraction of trait heritability. Mapped QTL effects allowed us to  
49 estimate DSPR founder phenotypes, predictions that were correlated with the actual phenotypes  
50 of these lines. We observe a modest phenotypic correlation between starvation resistance and  
51 triglyceride level, traits that have been linked in previous studies. However, overlap among QTL  
52 identified for each trait is low. Since we also show that DSPR strains with extreme starvation  
53 phenotypes differ in desiccation resistance and activity level, our data imply multiple  
54 physiological mechanisms contribute to starvation variability. We additionally exploited the  
55 *Drosophila* Genetic Reference Panel (DGRP) to identify sequence variants associated with  
56 starvation resistance. Consistent with prior work these sites rarely fall within QTL intervals  
57 mapped in the DSPR. We were offered a unique opportunity to directly compare association  
58 mapping results across labs since two other groups previously measured starvation resistance in  
59 the DGRP. We found strong phenotypic correlations among studies, but extremely low overlap  
60 in the sets of genomewide significant sites. Despite this, our analyses revealed that the most  
61 highly-associated variants from each study typically showed the same additive effect sign in  
62 independent studies, in contrast to otherwise equivalent sets of random variants. This  
63 consistency provides evidence for reproducible trait-associated sites in a widely-used mapping  
64 panel, and highlights the polygenic nature of starvation resistance.

## 65 Introduction

66           Periods of food scarcity and suboptimal nutrient resources present an important  
67 challenge for nearly all species (McCue 2010), and this form of environmental stress can limit the  
68 survival of individuals with poor nutritional status and reduced stress resistance (Harshman *et al.*  
69 1999; Lee and Jang 2014). As a result, starvation stress resistance has direct implications for the  
70 fitness of individuals as they experience resource variability in natural populations. Starvation  
71 resistance is a classic quantitative, fitness-related trait that is associated with several other  
72 phenotypes that influence survival, lifespan, and reproduction (Service and Rose 1985; Da Lage  
73 *et al.* 1990; Rose *et al.* 1992; Toda and Kimura 1997; Karan and Parkash 1998; Hoffmann *et al.*  
74 2005b; Sørensen *et al.* 2007; Lee and Jang 2014). In particular, increased starvation resistance is  
75 often negatively correlated with fecundity and positively correlated with longevity, energy  
76 storage, and other stress response traits (Service *et al.* 1985; Rose *et al.* 1992; Hoffmann and  
77 Parsons 1993; Chippindale *et al.* 1993; Harshman *et al.* 1999; Bochdanovits and de Jong 2003;  
78 Bublik and Loeschcke 2005; Sørensen *et al.* 2007; Schwasinger-Schmidt *et al.* 2012; Lee and Jang  
79 2014). Because of pervasive phenotypic and genetic correlations between starvation resistance  
80 and these other traits, the evolution of starvation resistance in natural populations is complex,  
81 and is driven by adaptation to heterogeneous environments, phenotypic plasticity, and extensive  
82 pleiotropy (Service and Rose 1985; Hoffmann and Parsons 1991, 1993; Chippindale *et al.* 1993;  
83 Toda and Kimura 1997; Karan and Parkash 1998; Harshman *et al.* 1999; Harbison *et al.* 2004; Pijpe  
84 *et al.* 2007; Rion and Kawecki 2007; Bauerfeind *et al.* 2014; Colinet *et al.* 2015; Everman and  
85 Morgan 2018).

86           Artificial selection for starvation resistance often results in a concomitant increase in  
87 desiccation resistance (Hoffmann and Parsons 1989a; Chippindale *et al.* 1996; Hoffmann and  
88 Harshman 1999; Harshman *et al.* 1999; Hoffmann *et al.* 2001), and selection specifically on  
89 desiccation resistance can also result in a corresponding rapid increase in starvation resistance  
90 (Hoffmann and Parsons 1989b). Nonetheless, surveys of natural populations in several  
91 *Drosophila* species have shown that starvation and desiccation resistance can also independently  
92 vary (Davidson 1990; Karan and Parkash 1998; Karan *et al.* 1998; Chippindale *et al.* 1998;  
93 Hoffmann and Harshman 1999; Gilchrist *et al.* 2008; Goenaga *et al.* 2013). Given these variable

94 patterns, Karan and Parkash (1998) and Da Lage *et al.* (1990) suggest that desiccation and  
95 starvation resistance may not routinely be associated. Rather, both traits may be directly and  
96 indirectly influenced by climate variability, and selection on other correlated traits such as  
97 diapause or thermal tolerance in seasonally variable temperate environments (Hoffmann and  
98 Parsons 1989b; Schmidt *et al.* 2005; Sørensen *et al.* 2007; Rion and Kawecki 2007; Goenaga *et al.*  
99 2013; Rajpurohit *et al.* 2018).

100         Similar to desiccation, artificial selection for increased starvation resistance often results  
101 in an increase in lipid levels in *D. melanogaster* (Chippindale *et al.* 1996, 1998; Djawdan *et al.*  
102 1998; Harshman *et al.* 1999; Schwasinger-Schmidt *et al.* 2012; Goenaga *et al.* 2013; Hardy *et al.*  
103 2018), suggesting that energy storage is one important mechanism that contributes to starvation  
104 resistance. However, variation in the association between these traits has also been observed.  
105 For example, while Chippindale *et al.* (1996) provided evidence of a strong positive correlation  
106 between starvation resistance and lipid concentration following 60 generations of selection for  
107 starvation resistance, Hoffmann *et al.* (2001) found that total lipid concentration and starvation  
108 resistance in isofemale lines derived from natural populations were not correlated. Thus, the  
109 association between starvation resistance and lipid level is likely dependent upon genetic  
110 background and the evolutionary history of a population, resulting in across-population variation  
111 in the strength and direction of the correlation between these traits.

112         Genetic dissection of starvation resistance can both lead to the identification of loci  
113 impacting phenotypic variation and help understand how this trait is associated with desiccation  
114 resistance and lipid level. Several studies have examined the genetic basis of starvation resistance  
115 in *D. melanogaster* using a combination of selection experiments (Rose *et al.* 1992; Chippindale  
116 *et al.* 1996; Harshman *et al.* 1999; Bochdanovits and de Jong 2003; Bublik and Loeschcke 2005;  
117 Schwasinger-Schmidt *et al.* 2012; Hardy *et al.* 2018; Michalak *et al.* 2018), gene expression studies  
118 following exposure to starvation stress (Harbison *et al.* 2005; Sørensen *et al.* 2007), and genetic  
119 mapping (Harbison *et al.* 2004; Mackay *et al.* 2012; Huang *et al.* 2014; Everman and Morgan  
120 2018). These studies have provided extensive lists of candidate genes and variants, some of which  
121 have been functionally validated (Lin *et al.* 1998; Clancy *et al.* 2001; Harbison *et al.* 2004, 2005;  
122 Sørensen *et al.* 2007). However, up to this point few studies have undertaken an examination of

123 the genetic architecture of triglyceride or lipid content in the same genetically diverse panel used  
124 to examine variation in starvation resistance. Doing so would allow a detailed comparison of  
125 quantitative trait loci (QTL) that contribute to variation in each trait, provide insight into the  
126 similarity of the genetic architectures of starvation resistance and correlated traits, and facilitate  
127 a better understanding of their evolution, and the mechanisms underlying their variation.

128 In this study we use two powerful *D. melanogaster* mapping panels - the *Drosophila*  
129 Synthetic Population Resource (DSPR) and the *Drosophila* Genetic Reference Panel (DGRP) - to  
130 genetically dissect phenotypic variation, and to explore the phenotypic and genetic relationships  
131 among traits, among mapping panels, and among laboratories. Our approach allows us to  
132 accomplish three primary objectives. First, by measuring starvation resistance and triglyceride  
133 level in the DSPR, we assess overlap in the loci that contribute to variation in each trait. Prior  
134 work on these traits in flies suggests they would show similar genetic architectures with many  
135 pleiotropic loci. However, despite a significant phenotypic correlation, we report limited overlap  
136 among mapped loci contributing to variation in starvation resistance and triglyceride level,  
137 suggesting that the genetic basis of these traits is largely independent in the DSPR. This highlights  
138 the role that other physiological mechanisms, such as activity level and desiccation resistance  
139 that also we explore here, may have in influencing starvation resistance.

140 Second, by measuring starvation resistance in both the DSPR and the DGRP under the  
141 same environmental conditions, we address variation in the genetic architecture of this trait  
142 between two distinct populations. In common with some previous studies using both panels to  
143 dissect a trait (e.g. Najarro *et al.* 2015, 2017), we also find little overlap in the loci associated with  
144 starvation resistance between mapping panels. This is likely the combined result of the  
145 populations having unique genetic backgrounds (King and Long 2017), distinct evolutionary  
146 histories, and differences in power to detect causative loci (Long *et al.* 2014).

147 Third, we leverage the ability to repeatedly measure trait variation on the same, stable  
148 set of inbred genotypes to compare our DGRP starvation data to two previous starvation  
149 resistance datasets collected by different laboratories (Mackay *et al.* 2012; Everman and Morgan  
150 2018). We found that the sign of the additive effects of the most strongly-associated SNPs were  
151 consistent across datasets. This suggests these SNPs contribute to variation in starvation

152 resistance in the DGRP, but have sufficiently small effects that they are regularly not identified  
153 following genomewide multiple testing correction. This across-study comparison of the genetic  
154 architecture of starvation resistance provides both technical insight into the use of genomewide  
155 association (GWA) studies to understand the genetic basis of complex traits, and biological insight  
156 into the phenotypic effects of loci that contribute to trait variation.

## 157 **Materials and Methods**

158

### 159 **Mapping populations**

#### 160 *Drosophila Synthetic Population Resource*

161 The DSPR is a multiparental population that consists of two synthetic populations (pA and  
162 pB) that were each established following an intercross of eight highly-inbred founder lines, with  
163 one founder line shared between the two populations (King *et al.* 2012a). Flies were maintained  
164 in pairs of subpopulations (pA1, pA2, pB1, pB2) at high population density for 50 generations  
165 prior to the establishment of >1600 genotyped recombinant inbred lines (RILs) via 25 generations  
166 of full-sib inbreeding (King *et al.* 2012a; b). Founder lines for the pA and pB panels have also been  
167 sequenced at 50x coverage, enabling inference of the haplotype structure of each RIL via a hidden  
168 Markov model (described in King *et al.* (2012a)).

169

#### 170 *Drosophila Genetic Reference Panel*

171 The DGRP was established from mated females collected from a natural population in  
172 Raleigh, North Carolina, with inbred lines derived from 20 generations of full-sib mating (Mackay  
173 *et al.* 2012). Each of the 205 DGRP lines have been re-sequenced and genotyped allowing GWA  
174 mapping to be carried out in the panel (Mackay *et al.* 2012; Huang *et al.* 2014).

175

### 176 **Phenotyping assays and analysis**

#### 177 *Large-scale starvation resistance assay*

178 Strains from the DSPR and DGRP were duplicated from stocks, and flies were allowed to  
179 lay eggs for up to 2 days. Vials were inspected twice daily, and laying adults were cleared when  
180 necessary to maintain a relatively even egg density across experimental vials. While this visual

181 method of density control is less precise than counting eggs, experiments with 20 randomly-  
182 selected DSPR RILs showed that the effect on starvation resistance of rearing flies via egg  
183 counting or by visually-assessing egg number is extremely limited (variance explained = 0.9%; Fig  
184 S1; see Table S1 for full breakdown of variance components).

185 In the following generation, experimental flies (2-4 days old) were sorted by sex over light  
186 CO<sub>2</sub> anesthesia and placed in groups of same-sex individuals on new cornmeal-molasses-yeast  
187 media for 1 day until the start of the starvation assay. The assay was initiated by placing flies on  
188 1.5% agar media that additionally contained preservatives - a mix of propionic and phosphoric  
189 acids, and benzoic acid (Tegosept, Genesee Scientific) dissolved in ethanol (see starvation media  
190 recipe Text S1). Starvation media was made within 24 hours of the initiation of each block of the  
191 assay and was not replaced throughout its duration. Vials were barcoded during the screen,  
192 blinding experimenters to strain identification number, and assisting with efficient data collection  
193 and analysis.

194 Death was assessed for each vial twice per day at approximately 0900 and 2100 hrs. The  
195 first assessment of survival was made 24 hours after flies were transferred to starvation media.  
196 Dead flies at this initial assessment point were not included in the analysis as their death may  
197 have resulted from handling during the initial transfer to experimental vials rather than  
198 starvation stress. Vials containing flies that had become entangled in the cotton vial plug at any  
199 point during the assay were also excluded from the analysis. Flies were considered dead if they  
200 were not moving or were unable to dislodge themselves from the starvation media. The  
201 phenotype used for mapping was the mean time to death in hours per strain across the vial  
202 replicates. Flies for this screen were reared and tested at approximately 23°C, 30-60% humidity,  
203 with constant light.

204 We screened the DSPR (861 pA1/pA2 and 864 pB1/pB2 RILs) in a series of batches across  
205 a seven-month period in 2010. Each batch included the majority of RILs that belonged to a  
206 particular subpopulation. Starvation resistance was measured in 168 DGRP lines in a single batch  
207 in 2012. In both mapping panels, survival was measured across 2 vial replicates per sex in ~85%  
208 of strains, with ~90% of vials containing 10 flies (minimum flies per vial = 6). Finally, we measured

209 starvation resistance in the 15 DSPR founder lines, using 5 vial replicates per founder, in one  
210 batch.

211 We assessed variation in starvation resistance due to subpopulation and sex in the DSPR  
212 with a two-way ANOVA, including the interaction, and treated subpopulation (pA1, pA2, pB1,  
213 pB2) and sex as fixed factors. Male and female-specific differences among the four  
214 subpopulations were tested using Tukey's HSD post hoc comparisons with an experiment-wide  
215  $\alpha = 0.05$ . Differences in starvation resistance due to sex among the DGRP lines were analyzed  
216 with a one-way ANOVA, treating sex as a fixed factor.

217

### 218 *Desiccation resistance assay*

219 To investigate the correlation between starvation and desiccation resistance, we  
220 measured desiccation resistance in a subset of pA1/pA2 RILs that exhibited very low (17 RILs) or  
221 very high (16 RILs) average female starvation resistance in the large-scale screen. Desiccation  
222 resistance of female flies from all 33 strains was assessed in a single batch with two vial replicates  
223 per RIL, where 92.9% of vials contained 10 flies (minimum flies per vial = 8). We placed  
224 experimental flies, reared as described above, in empty vials plugged with cotton inside an  
225 airtight desiccator (Cleatech, LLC). Relative humidity was reduced to < 5% throughout the  
226 experiment by adding a large quantity of Drierite (calcium sulfate) to the chamber. Survival was  
227 assessed every hour following initiation of the experiment, and mean desiccation resistance per  
228 RIL was used in all analyses.

229

### 230 *Activity assay*

231 We employed the *Drosophila* Activity Monitoring System (DAM2, TriKinetics, Inc.) to  
232 assess activity levels both prior to, and during starvation for a subset of DSPR RILs, selecting 16  
233 (19) pA1/pA2 RILs that exhibited high (low) female starvation resistance in the large-scale screen.  
234 Sixteen flies of each sex were tested per RIL. Flies for these assays were reared and tested at  
235 25°C, 50% relative humidity, with a 12:12hr light:dark photoperiod. These environment  
236 conditions are different from our large-scale screen, but in line with those used in previous  
237 starvation resistance studies in *D. melanogaster* (Mackay *et al.* 2012; Everman and Morgan



238 2018). This change allowed us to examine the stability of DSPR starvation phenotypes across  
239 assay environments.

240 One day prior to adding flies to monitor tubes, cornmeal-yeast-dextrose media was  
241 poured into 100mm diameter petri dishes and allowed to set. Polycarbonate activity monitor  
242 tubes (5mm diameter x 65mm length) were filled to approximately 10mm by pushing them into  
243 the media, and the food plug in each tube was sealed with paraffin wax. A single fly was aspirated  
244 into each tube, and the tubes were capped with small pieces of Drosophila Plugs (Genesee Scientific).  
245 Flies were allowed to acclimate to the tubes for 24 hours, and then we measured activity for the  
246 next 24 hours under non-stressful conditions. Subsequently, each fly was tipped to a second  
247 monitor tube containing starvation media (Text S1) and activity was continuously monitored until  
248 each fly died.

249 To determine differences in activity under non-stressful conditions due to starvation  
250 resistance rank (high versus low), we used a full three-way ANOVA model with interactions, and  
251 treated starvation rank, sex, and light status (light versus dark) as fixed effects. The effect size of  
252 the main effects and interactions were calculated using Cohen's F, which determines the effect  
253 size as a ratio of the between-group and between-replicate standard deviations (R package:  
254 sjstats) (Cohen 1988; Quinn and Keough 2002; Lüdecke 2018).

255

### 256 *Triglyceride level assay*

257 We duplicated 311 pA1/pA2 and 628 pB1/pB2 DSPR RILs from stocks to two replicate  
258 vials, clearing parental flies when necessary to maintain relatively even egg density over test vials.  
259 Eleven days following the start of egg laying we collected two sets of 10-12 females from each  
260 parental vial, resulting in four collection vials from each RIL. Flies were aged for three additional  
261 days before measuring triglyceride level.

262 Experimental females from each collection vial were anesthetized using CO<sub>2</sub>, and groups  
263 of 5 were arrayed into deep well plates (Axygen, P-DW-11-C) over ice, with each well pre-loaded  
264 with a single glass bead. This resulted in 8 replicate samples of 5 females per RIL. Immediately  
265 after finishing a plate, we added 400µl of cold homogenization buffer (10mM potassium  
266 phosphate monobasic, 1mM EDTA, 0.05% Tween-20) to each well, homogenized for 45sec in a

267 Mini-BeadBeater-96 (Bio Spec Products, Inc.), and centrifuged for 4min at 2,500g. We then  
268 moved 50µl of the supernatant to a standard PCR plate, incubated the plate in a thermocycler at  
269 70°C for 5min, and then placed the plate on ice for 5min.

270 During the incubation steps, we added 30µl of homogenization buffer to 92 of the 96  
271 wells of a flat-bottom, polystyrene assay plate (Greiner, 655101), and subsequently added 20µl  
272 of the heat-deactivated fly homogenate to each. The four remaining wells of every assay plate  
273 were dedicated to controls; one blank well contained 50µl of homogenization buffer only, and  
274 three wells contained 5µl of Glycerol Standard Solution (SigmaAldrich, G7793, 2.5mg/ml) along  
275 with 45µl of homogenization buffer.

276 The assay plate was then inserted into a BioTek Powerwave XS2 instrument pre-heated  
277 to 37°C and read at 540nm (baseline absorbance scan). After the scan, and within 10min, we  
278 added 100µl of Free Glycerol Reagent (SigmaAldrich, F6428) to each well. The plate was then re-  
279 inserted into the instrument, incubated at 37°C for 5min, and read again at 540nm (free glycerol  
280 absorbance scan). After this second scan, and again within 10min, we added 25µl of Triglyceride  
281 Reagent (SigmaAldrich, T2449) to each well. The plate was again incubated at 37°C for 5min in  
282 the machine and read for a third time at 540nm (triglyceride, or final absorbance scan).

283 For each sample, we obtained the final absorbance for each sample ( $FA_{sample}$ ) and  
284 calculated the initial absorbance ( $IA_{sample}$ ) as the free glycerol measurement minus the baseline  
285 measurement. We also generated the average final absorbance for the three standard wells  
286 ( $FA_{std}$ ) and the initial absorbance for the one blank well ( $IA_{blank}$ ). We then estimated the true  
287 serum triglyceride level as

288

$$289 \quad [FA_{sample} - (IA_{sample} \times F)] / [FA_{std} - (IA_{blank} \times F)]$$

290

291 where  $F = 0.8$ . We then multiplied this value by the concentration of the glycerol standard  
292 solution (2.5mg/ml) and used the average value across all 8 replicate samples as the RIL mean  
293 triglyceride level for mapping and analysis. For precise details of the enzyme assay and  
294 triglyceride calculation, see the SigmaAldrich Serum Triglyceride Determination kit product insert  
295 (TR0100). Differences in triglyceride level due to DSPR subpopulation were investigated with a

296 one-way ANOVA followed by *post hoc* comparisons using Tukey's HSD (experiment-wide  $\alpha =$   
297 0.05).

298

### 299 Correlations among traits

300 We assessed the relationship between the DSPR RIL mean starvation phenotypes from  
301 the large-scale screen with those from the activity monitor experiment, the desiccation  
302 resistance measures, and triglyceride level using general linear models. Subpopulation (pA1, pA2,  
303 pB1, pB2) was included as a factor in the analysis examining starvation resistance and triglyceride  
304 content.

305 Correlations among three DGRP starvation datasets - that from Mackay et al. (2012),  
306 Everman and Morgan (2018), and the new screen we report here - were examined in a pairwise  
307 manner using line means, accounting for multiple comparisons with a Bonferroni-adjusted alpha  
308 level. Differences in the overall mean starvation resistance among the three datasets were  
309 analyzed with a one-way ANOVA, treating study as a fixed factor.

310

### 311 Heritability

312 The genetic and phenotypic variances of starvation resistance and triglyceride content for  
313 the pA and pB DSPR panels, and of starvation resistance for the DGRP panel, were estimated with  
314 a linear mixed model using the lme and varcomp functions in R (R package: APE, Paradis *et al.*  
315 2004; R package: nlme, Pinheiro *et al.* 2017). We calculated broad-sense heritability as the  
316 proportion of the total variance of the strain-specific response explained by the estimated  
317 genetic variance component (Lynch and Walsh 1998).

318

### 319 QTL mapping in the DSPR

320 Methods for QTL analysis, and the power and resolution of mapping using the DSPR panel  
321 are discussed in detail in King *et al.* (2012a,b). Briefly, QTL mapping and peak analysis were  
322 executed for starvation resistance and triglyceride data using the DSPRqtl R package  
323 ([github.com/egking/DSPRqtl](https://github.com/egking/DSPRqtl); [FlyRILs.org](http://FlyRILs.org)), regressing the mean trait response for each RIL on the  
324 additive probabilities that each of the 8 founders contributed the haplotype of the RIL at each

325 mapped position. Significance thresholds were assigned following 1000 permutations of the data,  
326 and positions of putative causative loci were estimated with 2-LOD support intervals, which  
327 approximate 95% confidence intervals for QTL position in the DSPR (King *et al.* 2012a). Mean  
328 starvation resistance varied between sexes in both the pA and pB panel ( $F_{3,3440} = 18.317$ ;  $p <$   
329  $0.0001$ ; Fig S2; Table S2), and subpopulation influenced female starvation resistance in the pA  
330 panel (Tukey's HSD  $p < 0.0001$ ; Fig S2). Therefore, QTL mapping was performed for males and  
331 females of each panel separately, and subpopulation was included as a covariate in the analysis  
332 of pA females. Mean female triglyceride level was similar between the pA1 and pA2  
333 subpopulations (Tukey's HSD  $p = 0.75$ ; Fig S3; Table S3) but varied between the pB1 and pB2  
334 subpopulations (Tukey's HSD  $p < 0.0001$ ; Fig S3; Table S3), so subpopulation was included as a  
335 covariate in QTL analysis of the pB triglyceride data.

336

### 337 Analysis of DGRP starvation data

338 Variants associated with male and female starvation resistance in the DGRP were  
339 identified using the DGRP2 web-based GWA mapping tool (<http://dgrp2.gnets.ncsu.edu>), which  
340 takes into account variable *Wolbachia* infection status and large inversions that segregate among  
341 the lines (Mackay *et al.* 2012; Huang *et al.* 2014). We performed GWA analysis on data collected  
342 in this study and additionally reanalyzed starvation data from Mackay *et al.* (2012) and starvation  
343 of young flies (5 – 7 days old) from Everman and Morgan (2018). We additionally assigned the  
344 150 DGRP lines that are shared between the three datasets an across-study mean and performed  
345 GWA analysis on this summary measure of starvation resistance.

346 SNPs associated with starvation resistance were identified within each of the four  
347 datasets following FDR correction for multiple comparisons (Benjamini and Hochberg 1995) in R  
348 ( $p.adjust$ ; R Core Team 2017). Since we found no significantly associated SNPs with an FDR  
349 adjusted  $p$ -value  $< 0.05$  for any starvation resistance dataset in either sex, we relaxed the  
350 significance threshold to an FDR adjusted  $p$ -value  $< 0.2$ . As a significance threshold of  $P < 10^{-5}$  is  
351 commonly used in the DGRP (e.g. Mackay *et al.* 2012; Morozova *et al.* 2014; Huang *et al.* 2014;  
352 Everman and Morgan 2018), we also present variants associated with starvation resistance in  
353 each of the four datasets using this threshold.

354           There was minimal overlap in the identity of the above-threshold, starvation-associated  
355 variants in each study. Thus, we sought to examine whether the sign of the additive effects of  
356 these sets of variants was preserved across studies. Additive effects were calculated as one-half  
357 the difference in starvation resistance between lines homozygous for the major allele and lines  
358 homozygous for the minor allele (major allele frequency > 0.5), after accounting for *Wolbachia*  
359 infection and TE insertions (Falconer and Mackay 1996; Huang *et al.* 2014). To determine the  
360 proportion of SNPs that are expected by chance to have additive effects of the same sign across  
361 studies, we obtained random samples of 50 SNPs from all of the DGRP SNP calls (~ 2 million SNPs)  
362 and calculated the additive effects of the sampled SNPs across pairs of datasets for each sex. To  
363 account for the possibility that the frequency spectrum of above-threshold ( $P < 10^{-5}$ ), associated  
364 SNPs is not represented by a set of randomly-selected variants, we stratified the random subsets  
365 of 50 SNPs according to the distribution of allele frequencies of the top 50 SNPs associated with  
366 starvation resistance for each sex in each study. Allele frequency bins used in this stratification  
367 were 0.05 – 0.1, > 0.1 – 0.2, > 0.2 – 0.3, > 0.3 – 0.4, and > 0.4 – 0.5. The exact stratification for  
368 each sex and dataset is provided in Table S4. This process was repeated 1000 times for each  
369 paired comparison of datasets (6 comparisons total) using an ordinary nonparametric  
370 bootstrapping procedure with the R package boot (Davison and Hinkley 1997; Canty and Ripley  
371 2017). For each iteration, we used a custom R function (see File S1) to calculate the proportion  
372 of the 50 random stratified SNPs that had positive additive effects in both of the datasets being  
373 compared.

374

### 375 Data availability

376           DGRP data from Mackay *et al.* (2012) are available online from  
377 <http://dgrp2.gnets.ncsu.edu>, and DGRP data from Everman and Morgan (2018) are available  
378 from Dryad (DOI: <https://doi.org/10.5061/dryad.vg087>). Data collected in this study is available  
379 from Dryad (available upon acceptance), including all raw data for starvation resistance in the  
380 DSPR and DGRP, raw desiccation resistance, triglyceride level, and activity data collected using  
381 the DSPR, and all mapping results (see File S2). R code for bootstrapping analysis and additive  
382 effect calculations in the DGRP is available in File S1.

## 383 Results and Discussion

### 384 Extensive phenotypic variation in starvation resistance in the DSPR and DGRP

385 Starvation resistance in both the DSPR and DGRP was highly variable among strains (Fig  
386 1, Fig 2), and the broad sense heritability for starvation resistance was routinely high (Table 1).  
387 Males were typically less starvation resistant than females (Fig S2, Fig S4, Table S2, Table S5),  
388 although despite this male and female starvation resistance were significantly correlated in both  
389 the DSPR (pA:  $R^2 = 53.0\%$ ; pB:  $R^2 = 57.0\%$ ; Fig S5) and DGRP ( $R^2 = 68.0\%$ ; Fig S6). Such sex-specific  
390 differences in starvation resistance are likely influenced by a combination of higher glycogen and  
391 triglyceride levels and larger body size, which are often observed for females relative to males  
392 (Chippindale *et al.* 1996; Toda and Kimura 1997; Schwasinger-Schmidt *et al.* 2012; Goenaga *et al.*  
393 2013).

394

395

396

397 **Table 1. Broad sense heritability for starvation resistance and triglyceride level.**

| Panel   | Trait         | Sex    | Heritability |
|---------|---------------|--------|--------------|
| DSPR pA | Starvation    | Female | 80.0%        |
| DSPR pA | Starvation    | Male   | 73.1%        |
| DSPR pB | Starvation    | Female | 74.4%        |
| DSPR pB | Starvation    | Male   | 71.5%        |
| DGRP    | Starvation    | Female | 87.1%        |
| DGRP    | Starvation    | Male   | 87.0%        |
| DSPR pA | Triglycerides | Female | 77.5%        |
| DSPR pB | Triglycerides | Female | 82.3%        |

398

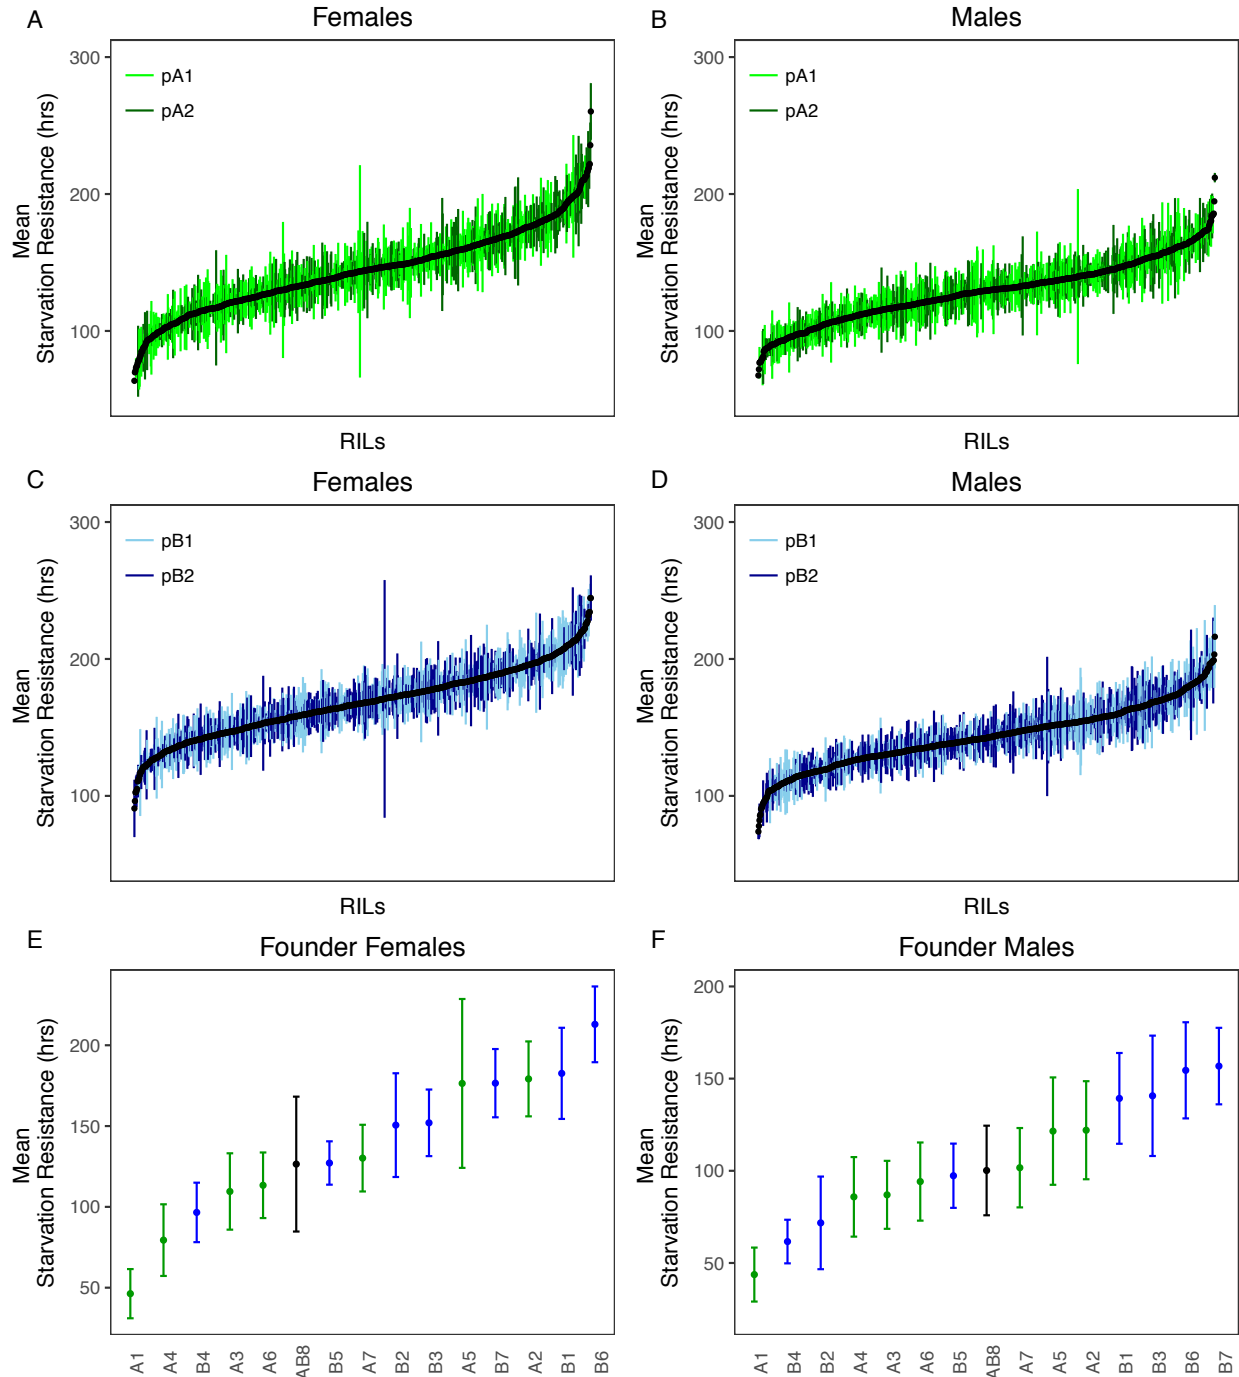

399

400 **Figure 1.** Variation in mean ( $\pm$ SD) starvation resistance for each sex. A-D shows data for DSPR RIL panels  
401 pA and pB. E and F show data for the founder lines. In E and F, names of the founder lines are shown on  
402 the x-axis; the founder line AB8 is the founder shared by the two mapping panels.

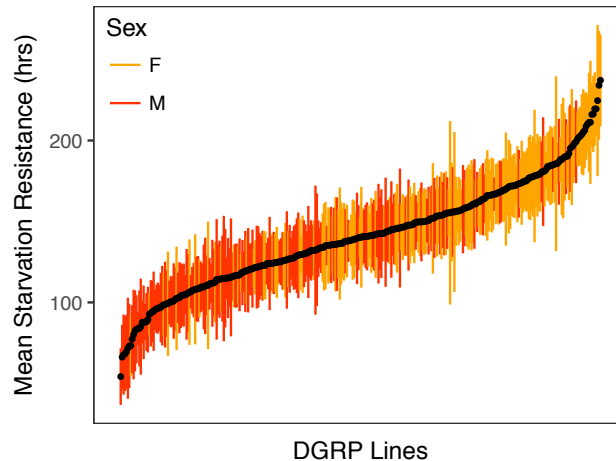

403

404 **Figure 2.** Variation in mean DGRP ( $\pm$ SD) starvation resistance in females (orange) and males (red).

405

406

407

408

We screened the DSPR and DGRP for starvation resistance at 23°C and under constant  
409 light conditions. Since starvation resistance is sensitive to the thermal environment (van  
410 Herrewege and David 1997; Karan and Parkash 1998; Karan *et al.* 1998; Hoffmann *et al.* 2005a;  
411 Bauerfeind *et al.* 2014) and may vary under different photoperiods (Sheeba *et al.* 2000; Xu *et al.*  
412 2008; Seay and Thummel 2011), we sought to re-measure starvation resistance for a subset of  
413 DSPR RILs at 25°C and with a 12 hour : 12 hour light/dark cycle, conditions that have been used  
414 in other starvation studies (e.g. Mackay *et al.* 2012; Everman and Morgan 2018). Overall,  
415 starvation resistance of the re-tested RILs was lower in both sexes compared to that measured  
416 in the original large-scale starvation assay (effect of assay:  $F_{1,136} = 31.60$ ,  $p < 0.0001$ ; Fig S7A).  
417 Despite this, starvation resistance in the subset of RILs was significantly correlated between the  
418 two experiments (Females:  $\beta = 0.43 \pm 0.04$ ,  $t = 9.7$ ,  $p < 0.0001$ ,  $R^2 = 73.9\%$ ; Males:  $\beta = 0.59 \pm 0.05$ ,  
419  $t = 10.9$ ,  $p < 0.0001$ ,  $R^2 = 78.3\%$ ; Fig S7B).

420

We similarly compared starvation resistance phenotypes for the DGRP measured in the  
421 current study with data generated by Mackay *et al.* (2012) and Everman and Morgan (2018). In  
422 our study, the DGRP exhibited considerably higher resistance than in these previous works ( $F_{2,532}$   
423  $= 1457.5$ ,  $p < 0.0001$ ; Fig S8). This discrepancy was not due to differences across studies in the  
424 frequency with which flies were counted (every 4, 8, or 12 hours depending on the study, Fig S8).  
425 To investigate whether the difference was due to the environmental conditions experienced by



426 the experimental animals, we raised and tested 12 randomly-selected DGRP lines under the same  
427 conditions as described for our initial screen (i.e., 23°C, 30-60% relative humidity, and constant  
428 light) and under conditions that more closely mimic those described in Mackay *et al.* (2012) and  
429 Everman and Morgan (2018) (i.e. 25°C, 50% relative humidity, and 12:12hr light:dark).  
430 Furthermore, for both environments, we assayed starvation on agar media containing  
431 preservatives (see Text S1), and on media lacking preservatives, as used by Everman and Morgan  
432 (2018) and Mackay *et al.* (2012). The inclusion of preservatives in the assay media had the largest  
433 effect on variation in starvation resistance among studies (Preservatives:  $F_{1,327} = 1628.9$ ,  $p \ll$   
434  $0.0001$ ; variance explained = 81.2%; Fig S9), with rearing/testing environment explaining very  
435 little of the variation (see Table S6 for the full breakdown of ANOVA variance components). We  
436 speculate that the antibiotic properties of the preservatives extend lifespan under starvation  
437 conditions by limiting growth of pathogenic microorganisms.

438 Even given the large across-study difference in mean starvation resistance in the DGRP,  
439 we found moderately strong correlations in both sexes over datasets, ranging from 50.8% to  
440 64.4% (Fig S10). The high correspondence among these three DGRP datasets, coupled with the  
441 phenotypic correlation between the subset of DSPR strains assayed using two different  
442 approaches (see above), suggests that fundamental aspects of the genetic control of starvation  
443 resistance are generally consistent over experiments, even when environmental conditions such  
444 as temperature are quite different. The differences we observe in starvation resistance between  
445 studies may reflect ecologically-relevant phenotypic plasticity. The temporally variable thermal  
446 environment is a particularly important source of selection for ectothermic organisms (Bell 2010;  
447 Bergland *et al.* 2014). Plastic shifts in starvation resistance in response to temperature can have  
448 important fitness benefits, including seasonal adaptation to fluctuating resource availability as  
449 has been reported in the butterfly *Bicyclus anynana* (Pijpe *et al.* 2007) and following the induction  
450 of diapause in *D. melanogaster* (Schmidt *et al.* 2005; Rion and Kawecki 2007). Collectively, these  
451 previous studies and our data speak to the important influence of both phenotypic plasticity and  
452 genotype on variation in starvation resistance in natural populations.

453

454 Starvation resistance is associated with desiccation resistance and low activity in the DSPR

455 Environmental stress can exert selection pressure on energy use and storage, and  
456 environmental stressors that impact one type of stress resistance often impact a suit of other  
457 stress-related traits (Hoffmann and Parsons 1989b). Several artificial selection studies for  
458 starvation resistance have shown a correlated change in desiccation resistance, suggesting these  
459 stress traits are related (Hoffmann and Parsons 1989a; b; Chippindale *et al.* 1996; Hoffmann and  
460 Harshman 1999; Harshman *et al.* 1999; Hoffmann *et al.* 2001). For instance, a detailed study of  
461 this correlated response by Hoffmann and Parsons (1989b) demonstrated a rapid phenotypic  
462 response in both desiccation and starvation resistance following four generations of strong  
463 selection for increased desiccation resistance, and in part this was attributed to selection acting  
464 on a general stress response mechanism. Subsequent genomics studies have suggested that this  
465 rapid phenotypic response is accompanied by rapid and extensive genomic change (Kang *et al.*  
466 2016), and that extensive pleiotropy underlies desiccation resistance (Telonis-Scott *et al.* 2012,  
467 2016; Kang *et al.* 2016; Griffin *et al.* 2017).

468 We investigated the association between starvation and desiccation resistance in the  
469 DSPR by measuring female desiccation resistance in RILs chosen from the two tails of the  
470 phenotypic distribution of female starvation resistance. We found that desiccation and starvation  
471 resistance were significantly correlated ( $R^2 = 43.8$ ,  $F_{1,31} = 24.11$ ,  $p < 0.0001$ ; Fig 3). Since mean  
472 desiccation resistance was considerably lower than mean starvation resistance for all lines tested  
473 (compare Figs 1 and 3), flies experiencing desiccation conditions are unlikely to be dying from  
474 starvation. In addition, since DSPR lines with very low starvation resistance do not also have low  
475 larval viability (data from Marriage *et al.* 2014) or reduced adult lifespan (data from Highfill *et al.*  
476 2016) it does not appear that DSPR lines with very low resistance to starvation and desiccation  
477 are simply "sick" (Fig S11). The relationship between starvation and desiccation resistance in the  
478 present study provides support for the genetic correlation and shared physiological mechanisms  
479 that have been proposed to exist between these traits (Hoffmann and Parsons 1989a; b, 1993;  
480 Harshman *et al.* 1999; Kennington *et al.* 2001). However, the correlation we observed is modest,  
481 and does not rule out the possibility that the covariation observed between starvation and  
482 desiccation resistance may be influenced by genetic variation in one or more other resistance-

483 associated traits. A more intensive sampling of the DSPR would be necessary to thoroughly  
484 investigate the genetic correlation between starvation and desiccation resistance.

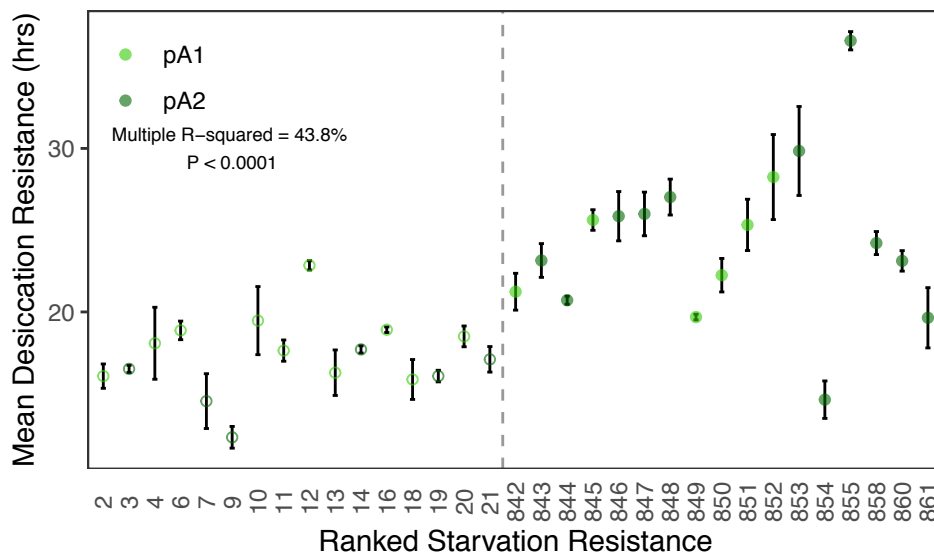

485

486 **Figure 3.** Mean starvation and desiccation resistance are correlated in the DSPR ( $F_{1,31} = 21.11$ ,  $p < 0.0001$ ).  
487 Desiccation resistance is presented as RIL means ( $\pm$ SD). Open symbols indicate “low” starvation resistance  
488 RILs; filled symbols indicate “high” starvation resistance RILs, and the dashed vertical line separates these  
489 RIL classes.

490

491

492

493 One physiological mechanism that may increase tolerance to environmental stressors is  
494 a reduction in metabolic rate (Lighton and Bartholomew 1988; Hoffmann and Parsons 1989a; b,  
495 1991; Chippindale *et al.* 1996; Djawdan *et al.* 1997; Marron *et al.* 2003; Rion and Kawecki 2007;  
496 Schwasinger-Schmidt *et al.* 2012; Slocumb *et al.* 2015). Indeed, selection for both starvation and  
497 desiccation resistance has been shown to lead to a correlated change in activity level, an indirect  
498 proxy for metabolic rate (Hoffmann and Parsons 1989b, 1993; Schwasinger-Schmidt *et al.* 2012).  
499 Here, we assessed activity of a subset of RILs exhibiting high and low starvation resistance to  
500 understand how genetic variability in starvation resistance relates to activity levels under non-  
501 stressful conditions. In the presence of nutritive media males and females differed in activity level  
502 across the light and dark period ( $F_{1,132} = 16.9$ ,  $p < 0.0001$ ; Fig 4; Table S7), with high starvation  
503 resistance RILs exhibiting significantly lower activity levels than low starvation resistance RILs  
504 ( $F_{1,132} = 12.5$ ,  $p < 0.001$ ; Fig 4; Table S7). The effects of starvation resistance rank (high vs low),

505 sex, and the light status (light versus dark) on activity were similar in magnitude (Cohen's  $F$ : 0.21-  
506 0.36; Table S7), suggesting that these factors contribute similarly to variation in waking activity  
507 levels.

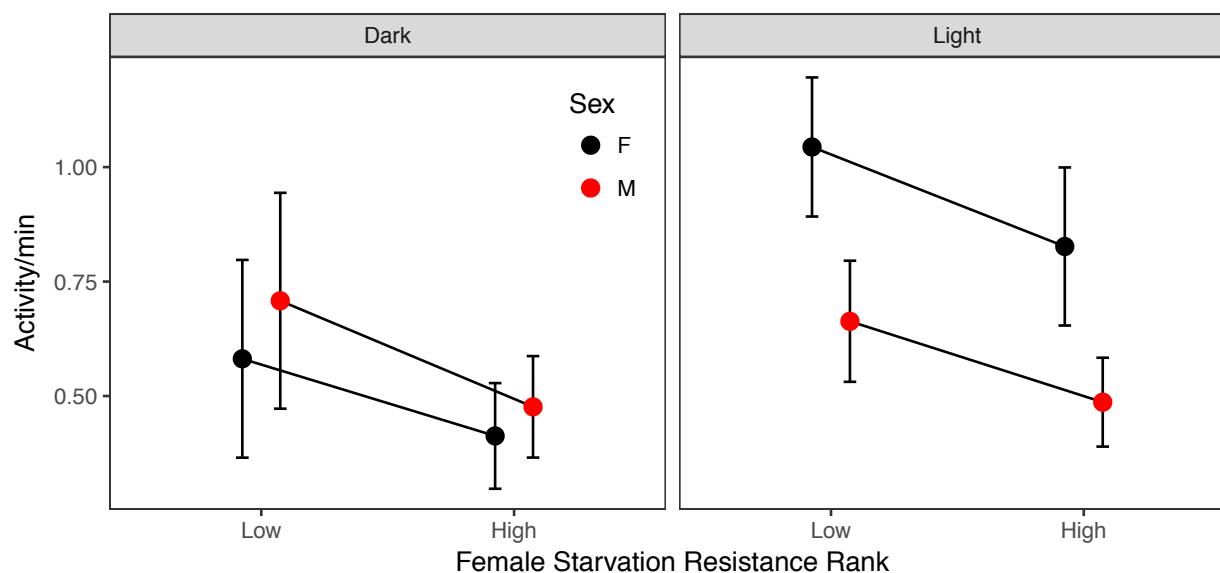

508  
509 **Figure 4.** Activity level on regular media for males (red) and females (black) from a subset of high and low  
510 female starvation resistance RILs. Panels indicate the light and dark periods of a 24-hour monitoring  
511 period. Activity while awake was influenced by both a sex-by-light interaction ( $F_{1,132} = 16.9$ ,  $P < 0.001$ ) and  
512 by starvation resistance class (i.e. high or low;  $F_{1,132} = 12.5$ ,  $P < 0.001$ ).

513  
514  
515  
516 The differences in activity between high and low starvation resistance lines on regular,  
517 nutritive media (Fig 4) were preserved under starvation stress conditions, with the high  
518 starvation resistant lines being less active than the low starvation resistant lines throughout the  
519 starvation process (Fig S13; Table S8). This pattern aligns with that from previous studies. For  
520 instance, Schwasinger-Schmidt *et al.* (2012) found that activity of flies with high starvation  
521 resistance was reduced following 15 generations of selection for starvation resistance in both  
522 males and females. Slocumb *et al.* (2015) also found that waking activity was reduced in lines  
523 selected to have high starvation resistance. Although previous associations between increased  
524 starvation tolerance and lower activity levels, metabolic rate, and changes in behavior have been  
525 observed (Murphey and Hall 1969; Hoffmann and Parsons 1989a; Blows and Hoffman 1993;

526 Djawdan *et al.* 1997; Karan *et al.* 1998; Schwasinger-Schmidt *et al.* 2012; Masek *et al.* 2014), our  
527 findings present a novel addition to our understanding of how increased starvation resistance  
528 may occur. Behavioral components of energy conservation are likely to play a role in how  
529 individuals compensate for stressful conditions (van Dijk *et al.* 2002; McCue 2010; Masek *et al.*  
530 2014) and represent an additional facet of the complex nature of phenotypic variability in  
531 starvation resistance.

532

### 533 Starvation resistance and triglyceride level are correlated in the DSPR

534       Periods of starvation have been shown to significantly reduce triglyceride levels in both  
535 males and females (Schwasinger-Schmidt *et al.* 2012), and others have suggested that fat stores  
536 and starvation resistance may be genetically correlated (Service *et al.* 1985; Rose *et al.* 1992;  
537 Chippindale *et al.* 1996; Harshman *et al.* 1999; Schwasinger-Schmidt *et al.* 2012; Slocumb *et al.*  
538 2015). To investigate the relationship between these traits in the DSPR, we measured mean  
539 female triglyceride level in a subset of the pA and pB DSPR RILs and found substantial phenotypic  
540 and genetic variation among RILs (Table 1; Fig 5). Mean starvation resistance and triglyceride  
541 level were positively correlated in both DSPR panels, although the correlation in the pA and pB  
542 panels was significantly different (Fig 6). Overall, variation in mean starvation resistance  
543 explained 23.7% of the variation observed in mean triglyceride level among the DSPR RILs across  
544 the two mapping panels ( $R^2 = 23.7\%$ ,  $F_{3,929} = 95.96$ ,  $p < 0.0001$ ; Fig 6), suggesting that a proportion  
545 of variation in female starvation resistance can be explained by variation in triglyceride level in  
546 the DSPR.

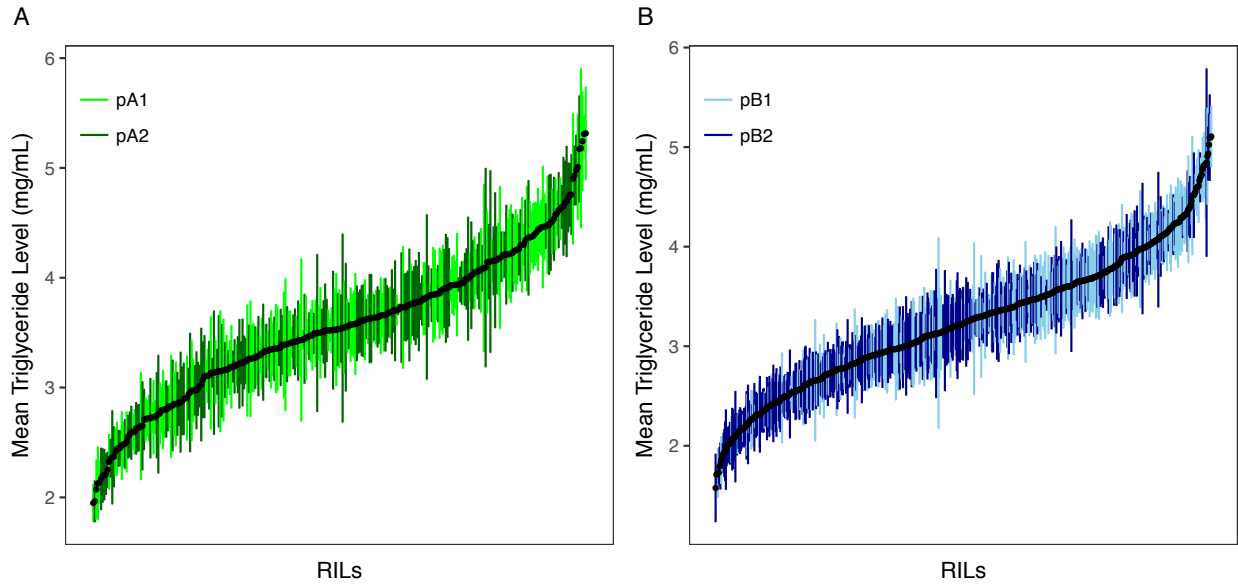

547

548 **Figure 5.** Variation in mean DSPR triglyceride level ( $\pm$ SD) for females in the pA panel (A) and pB panel (B).

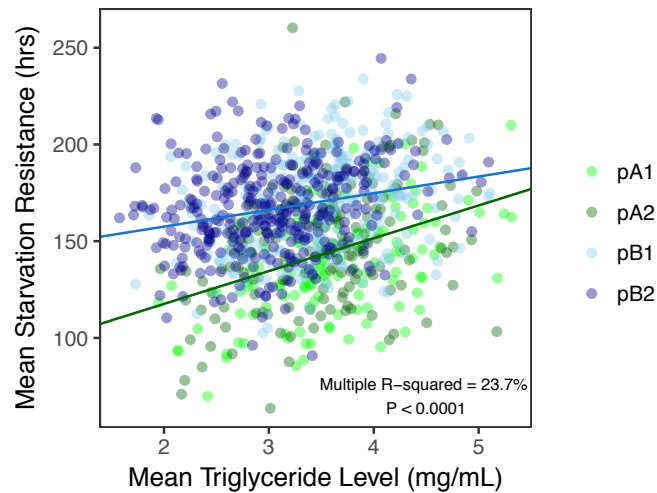

549

550 **Figure 6.** Mean starvation resistance and triglyceride level are positively correlated in females ( $F_{3,929} =$   
551  $95.96$ ,  $p < 0.0001$ ). The strength of the correlation varied between the two mapping panels (interaction:  
552  $F_{1,929} = 9.32$ ,  $p < 0.01$ ). Points are colored to indicate subpopulation for each mapping panel, although  
553 subpopulation was not included in the regression analysis.

554

555

556

557

558

559

560

The correlation between triglyceride level (or total lipid level, depending on the study) and starvation resistance has been measured in numerous natural and artificially selected *Drosophila* populations, and a positive relationship is often described (Chippindale *et al.* 1996; Djawdan *et al.* 1997; van Herreweghe and David 1997; Harshman *et al.* 1999; Schwasinger-Schmidt

561 *et al.* 2012; Goenaga *et al.* 2013; Slocumb *et al.* 2015; Hardy *et al.* 2018). For example, in  
562 isofemale lines derived from populations distributed across approximately 14.4 degrees of  
563 latitude, Goenaga *et al.* (2015) found that 12% of the variation in female starvation resistance  
564 was accounted for by lipid content. Similarly, Chippindale *et al.* (1996) found a very strong  
565 positive relationship between total lipids and starvation resistance following extended selection  
566 for increased starvation resistance and suggested that lipid levels may directly determine  
567 starvation resistance. However, a strong correspondence between lipid content and starvation  
568 resistance is not always observed in strains derived from natural populations (Robinson *et al.*  
569 2000; Hoffmann *et al.* 2001; Jumbo-Lucioni *et al.* 2010). For example, Jumbo-Lucioni *et al.* (2010)  
570 found no correlation between triacylglycerol levels and starvation resistance measured in inbred  
571 lines derived from a natural population. Hoffman *et al.* (2001) suggested that variation in the  
572 strength of the correlation between triglycerides and starvation resistance may be due to the  
573 evolutionary history of the study population. Evolutionary tradeoffs between increased lipid  
574 storage and other aspects of fitness may also influence the correlation between starvation  
575 resistance and lipid levels (Huang *et al.* 2014; Hardy *et al.* 2015, 2018). Furthermore, artificial  
576 selection may increase starvation resistance via mechanisms that preferentially modify lipid  
577 accumulation or metabolism, rather than by impacting energy level or energy-saving behavioral  
578 strategies (Hoffmann and Parsons 1989a; Blows and Hoffman 1993; Hoffmann *et al.* 2001;  
579 Marron *et al.* 2003; Rion and Kawecki 2007; Masek *et al.* 2014; Slocumb *et al.* 2015). The  
580 relationship observed between triglyceride levels and starvation resistance in our study supports  
581 the hypothesis that triglyceride levels and starvation resistance are likely physiologically related.  
582 Equally, it is evident from our data that triglyceride level likely influences starvation resistance to  
583 a lesser degree than proposed by Chippindale *et al.* (1996) and Hoffmann and Harshman (1999),  
584 and that starvation resistance and triglyceride level have the potential to evolve independently  
585 under natural selection.

586

### 587 Starvation resistance QTL allow prediction of DSPR founder phenotypes

588 We identified 8 QTL for starvation resistance in the pA panel and 7 QTL in the pB panel,  
589 several of which overlapped between sexes (Fig S14). Both sets of QTL explained a substantial

590 amount of variation in starvation resistance, with individual peaks accounting for 3.7-13.2% of  
 591 the variation (Table 2). The total variance explained by QTL in the pA (pB) population was 26.1%  
 592 (32.8%) in females and 17.5% (37.9%) in males, assuming QTL are independent and additive  
 593 (Table 2). None of the QTL identified in the pA and pB mapping panels overlapped, and since  
 594 power to detect 5% QTL is expected to be high in our study (King *et al.* 2012a) and all DSPR  
 595 phenotyping was completed within seven months using the same design and environmental  
 596 conditions, this likely reflects genetic variation among the different sets of founders used to  
 597 establish the two sets of lines.

598

599

600 **Table 2. Summary of QTL identified for starvation resistance and triglyceride level in the DSPR.**

| Starvation Resistance QTL: pA DSPR panel |     |          |     |                        |                       |                    |           |                                                       |
|------------------------------------------|-----|----------|-----|------------------------|-----------------------|--------------------|-----------|-------------------------------------------------------|
| QTL                                      | Sex | Peak LOD | Chr | Physical Interval (Mb) | Genetic Interval (cM) | Variance Explained | No. Genes | No. Potential Starvation Candidate Genes <sup>a</sup> |
| SA1                                      | M   | 7.41     | 2L  | 0.34-0.64              | 0.36-1.02             | 3.90               | 52        | 3                                                     |
| SA2                                      | F   | 10.85    | 2R  | 4.90-5.53              | 59.39-60.64           | 6.01               | 122       | 10                                                    |
| SA2                                      | M   | 10.59    | 2R  | 4.87-5.58              | 59.32-60.74           | 5.52               | 126       | 10                                                    |
| SA3                                      | F   | 8.05     | 2R  | 12.85-13.43            | 80.75-82.81           | 4.23               | 110       | 9                                                     |
| SA4                                      | F   | 7.03     | 2R  | 14.18-14.72            | 84.14-86.68           | 3.70               | 105       | 7                                                     |
| SA5                                      | F   | 10.13    | 3L  | 3.40-3.92              | 6.89-8.88             | 5.29               | 52        | 4                                                     |
| SA6                                      | F   | 13.21    | 3R  | 0.79-2.37              | 47.10-47.52           | 6.85               | 244       | 11                                                    |
| SA7                                      | M   | 7.66     | 3R  | 15.55-15.86            | 66.52-67.36           | 4.03               | 52        | 4                                                     |
| SA8                                      | M   | 7.73     | 3R  | 21.07-21.48            | 86.77-88.20           | 4.06               | 80        | 3                                                     |
| Starvation Resistance QTL: pB DSPR panel |     |          |     |                        |                       |                    |           |                                                       |
| QTL                                      | Sex | Peak LOD | Chr | Physical Interval (Mb) | Genetic Interval (cM) | Variance Explained | No. Genes | No. Potential Starvation Candidate Genes <sup>a</sup> |
| SB1                                      | F   | 7.68     | 2L  | 7.02-7.30              | 23.69-25.20           | 4.05               | 33        | 1                                                     |
| SB2                                      | M   | 8.35     | 2L  | 10.10-10.50            | 39.24-40.93           | 4.39               | 110       | 13                                                    |
| SB3                                      | F   | 7.13     | 2L  | 12.14-12.65            | 45.94-46.96           | 3.77               | 44        | 4                                                     |
| SB3                                      | M   | 7.05     | 2L  | 12.13-12.63            | 45.92-46.93           | 3.72               | 45        | 4                                                     |
| SB4                                      | F   | 12.28    | 2R  | 1.10-2.70              | 54.93-55.73           | 6.41               | 148       | 10                                                    |
| SB4                                      | M   | 19.40    | 2R  | 2.01-2.69              | 55.21-55.72           | 9.91               | 81        | 8                                                     |
| SB5                                      | F   | 18.98    | 3L  | 18.94-19.42            | 45.48-45.75           | 9.73               | 54        | 5                                                     |
| SB5                                      | M   | 26.40    | 3L  | 19.00-19.43            | 45.51-45.76           | 13.24              | 46        | 3                                                     |
| SB6                                      | F   | 9.07     | 3R  | 8.86-9.20              | 52.50-53.29           | 4.77               | 48        | 7                                                     |



|     |   |       |    |             |              |      |     |   |
|-----|---|-------|----|-------------|--------------|------|-----|---|
| SB6 | M | 12.77 | 3R | 8.57-9.21   | 52.33-53.30  | 6.64 | 90  | 9 |
| SB7 | F | 7.72  | 3R | 25.65-26.15 | 99.12-100.11 | 4.08 | 111 | 8 |

**Triglyceride Level QTL: pB DSPR panel**

| QTL | Sex | Peak LOD | Chr | Physical Interval (Mb) | Genetic Interval (cM) | Variance Explained | No. Genes | No. Potential Starvation Candidate Genes <sup>a</sup> |
|-----|-----|----------|-----|------------------------|-----------------------|--------------------|-----------|-------------------------------------------------------|
| TB1 | F   | 8.73     | 3L  | 3.45-4.09              | 7.08-9.52             | 6.22               | 84        | 7                                                     |
| TB2 | F   | 7.90     | 3R  | 7.18-8.01              | 50.50-51.54           | 5.64               | 118       | 5                                                     |
| TB3 | F   | 8.45     | 3R  | 8.31-8.71              | 51.96-52.54           | 6.03               | 54        | 8                                                     |
| TB4 | F   | 7.71     | X   | 17.34-17.43            | 57.17-57.44           | 5.51               | 4         | 0                                                     |

<sup>a</sup>Genes and functions associated with starvation resistance are listed in Table S9. The number of genes associated with starvation resistance (SR) was determined by cross-referencing genes within each QTL interval with previously reported candidates and biological functions reported by FlyBase (Lin et al. 1998; Clancy et al. 2001; FlyBase Curators et al. 2004; Harbison et al. 2004; Sørensen et al. 2007; Nuzhdin et al. 2007).

601  
602  
603  
604

Because we can estimate the effect associated with each founder haplotype at each mapped QTL in the DSPR, it follows that a combination of the estimates across all QTL can be used to predict the actual phenotypes of the original founder strains. We measured starvation resistance in the 15 DSPR founder lines (Fig 1E, F) to test this prediction. It is likely that the strength of the correlation between the estimated and actual trait response is influenced by the number and effect size of each QTL mapped for the trait. To account for differences in the degree to which starvation resistance is influenced by QTL of varying effect sizes, we calculated the predicted mean trait for each founder line weighted by the variance explained by each QTL.

612  
613  
614  
615  
616  
617  
618  
619  
620

As anticipated, using a general linear model the weighted mean predicted starvation resistance of the founders based on QTL effects was significantly correlated with the sex-averaged mean starvation resistance measured for the founder lines ( $R^2 = 60.8\%$ ,  $F_{3,13} = 6.12$ ,  $p < 0.01$ ; Fig 7). The slope of this relationship is relatively small ( $\beta = 0.13 \pm 0.07$ ), suggesting that while a large component of variation in starvation resistance is clearly genetic (supported by heritability estimates for each panel, Table 1), substantial variation in the phenotype is unaccounted for by additive genetic effects at mapped QTL. This unaccounted-for genetic variation in starvation resistance is likely due to many QTL with very small effects beyond our power to detect them (King *et al.* 2012a) and/or epistatic interactions among QTL (Evans *et al.*;

621 Mackay 2014). Epistasis may be especially important when comparing actual founder strain  
622 phenotypes with those inferred via QTL effects due to the many generations of recombination  
623 employed while establishing the DSPR from the inbred founders. However, the strength of the  
624 correlation between predicted and actual responses does suggest that QTL identified from the  
625 DSPR mapping panels identify causative loci that influence the level of starvation resistance  
626 among the progenitors of the RILs.

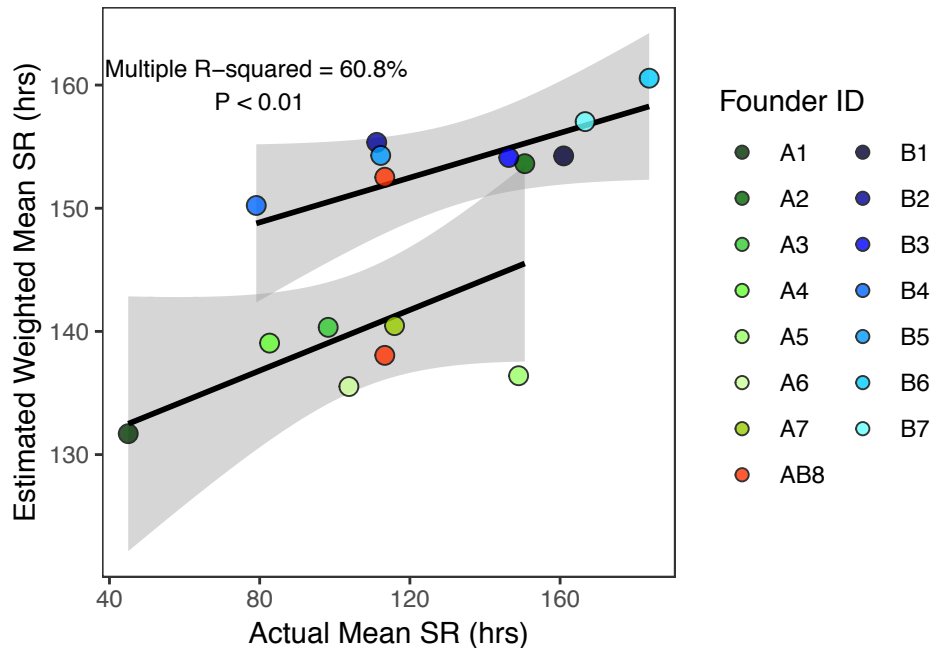

627  
628 **Figure 7.** Estimated starvation resistance weighted by the variance explained by each QTL and actual  
629 starvation resistance measured for the 15 founder lines of the DSPR were significantly correlated ( $\beta = 0.13$   
630  $\pm 0.07$ ;  $F_{3,13} = 6.21$ ,  $p < 0.01$ ). AB8 identifies the founder line shared between the pA and pB mapping panels  
631 estimated independently in each QTL analysis. Grey shading indicates the 95% CI of the regression.

632  
633  
634  
635 Limited overlap between the genetic architecture of starvation resistance and triglyceride  
636 level in the DSPR

637 To further understand the relationship between starvation resistance and triglyceride  
638 level in the DSPR we compared the genetic architectures of these two traits. We mapped four  
639 distinct QTL for triglyceride level in the pB population, each of which accounted for 5.5-6.2% of  
640 the variation in this trait (Table 2; Fig S15), in total explaining 23.4% of the variation in pB. No QTL

641 for triglyceride level were detected in the pA panel, likely due to the reduced number of pA RILs  
642 assessed (pA N = 311; pB N = 628). However, even with this reduced power, the QTL map for pA  
643 suggests that the genetic architecture for triglyceride level is different between the two mapping  
644 panels, as there is no evidence of near-significant peaks in pA within QTL intervals statistically  
645 identified in the pB panel (Fig S15).

646         Given the phenotypic correlation between triglyceride level and starvation resistance in  
647 the DSPR (Fig 6) and similar correlations previously reported in other studies (Chippindale *et al.*  
648 1998; Hoffmann and Harshman 1999), one might predict overlap of QTL associated with these  
649 traits. However, we see only limited evidence for this. Triglyceride QTL TB1 (mapped in the pB  
650 panel) and starvation QTL SA5 (mapped in the pA panel) do physically overlap, but given the  
651 complete lack of evidence for QTL for the same trait co-localizing in both the pA and pB DSPR  
652 mapping panels, it is unlikely the variant(s) underlying these QTL are the same. To investigate the  
653 relationship between the two QTL that do overlap within the same panel (SB6 and TB3), we  
654 assessed the influence of haplotype structure at the overlapping QTL on the positive phenotypic  
655 correlation between triglyceride level and starvation resistance (Fig 6). In this analysis, we first  
656 identified the founder haplotype for each RIL at the positions of the overlapping QTL peaks, and  
657 calculated the average phenotype of each of the founder haplotypes. We then assessed the  
658 correlation between haplotype-specific mean triglyceride level and starvation resistance with a  
659 general linear model. After accounting for the haplotype structure at the overlapping peaks, we  
660 found that mean starvation resistance and triglyceride level were significantly correlated ( $F_{1,7} =$   
661  $7.72$ ,  $p < 0.05$ ,  $R^2 = 52.4\%$ ; Fig S16), suggesting some pleiotropic variants may be responsible for  
662 this pair of overlapping starvation resistance and triglyceride level QTL.

663         The limited overlap in the QTL intervals associated with starvation and triglyceride level  
664 suggests that the genetic bases of this pair of traits are largely independent, or at least not tightly  
665 linked at QTL with moderate to large effects. In natural populations, increased starvation  
666 resistance may evolve as a result of selection on diverse traits including metabolic rate, activity  
667 level, lifespan, development rate, thermal tolerance, and fecundity (Service *et al.* 1985;  
668 Hoffmann and Parsons 1989b, 1993; Rose *et al.* 1992; Chippindale *et al.* 1993; Djawdan *et al.*  
669 1997; Harshman *et al.* 1999; Bochdanovits and de Jong 2003; Marron *et al.* 2003; Bublly and

670 Loeschcke 2005; Rion and Kawecki 2007; Schwasinger-Schmidt *et al.* 2012), and triglyceride levels  
671 may be influenced by genetic variation in each of these traits. Our evidence of minimal overlap  
672 between the genetic architectures of starvation resistance and triglyceride levels, coupled with  
673 a phenotypic correlation between these traits, may be indicative of a series of complex  
674 correlations between traits that influence stress tolerance, energy metabolism, and life history  
675 in the DSPR.

676

### 677 Candidate genes underlying fitness trait variation

678 Across all QTL identified for starvation resistance and triglyceride level in this study,  
679 several genes within mapped QTL intervals have functions related to these and other correlated  
680 traits (Table 2, Table S9). Of particular interest are the 30 genes that fall within our QTL intervals  
681 that were identified in previous starvation resistance studies (Clancy *et al.* 2001; Harbison *et al.*  
682 2005; Sørensen *et al.* 2007) (Table S9). Gene ontology analyses performed for each trait and panel  
683 revealed enrichment of genes within pA starvation QTL related to glutathione metabolic process  
684 (6.91-fold enrichment, FDR corrected  $P = 0.000146$ ; Table S10), as well as several categories that  
685 were enriched for genes implicated by mapped triglyceride QTL (Table S10). This enrichment  
686 could assist with the resolution of the functional genes within QTL regions. However, it should be  
687 noted that the sets of genes implicated by QTL mapping in the DSPR (3-244 genes per interval in  
688 this study) are extremely unlikely to all contribute to trait variation, and their presence within  
689 QTL intervals cannot alone be taken as evidence for causality.

690 Upon examination of the genes within the overlapping starvation resistance and  
691 triglyceride interval (TB3 and SB6), we found several genes that have either been predicted or  
692 experimentally demonstrated to be associated with traits related to starvation resistance and  
693 triglycerides or metabolism (Table S9 and references therein). Genes that fall within the intervals  
694 of the overlapping peaks include those that influence adult lifespan (e.g. *ry*, *Men*, *Gnmt*  
695 (Simonsen *et al.* 2006; Paik *et al.* 2012; Obata and Miura 2015)), lipid metabolic processes  
696 (including *Lip3*, *CG11598*, *CG11608*, *CG18530* (FlyBase Curators *et al.* 2004)), insulin signaling  
697 (e.g. *poly* (Bolukbasi *et al.* 2012)), response to starvation (e.g. *mthl12*, *Gnmt* (UniProt Curators  
698 2002; Obata *et al.* 2014)), larval feeding behavior (e.g. *Hug* (Melcher and Pankratz 2005)),

699 circadian rhythm and sleep (e.g. *timeout*, *Men* (Harbison *et al.* 2004; Benna *et al.* 2010)), and  
700 triglyceride homeostasis (*Gnmt* (Obata *et al.* 2014)) (Table S9). These genes are promising  
701 candidates for future studies seeking to examine the functional genetic relationship between  
702 these two traits.

703

## 704 Different mapping approaches reveal unique genetic architectures for starvation 705 resistance

706 Dissection of a quantitative genetic trait using different approaches can allow greater  
707 resolution of the genetic architecture, and provide insight into how alleles unique to different  
708 mapping panels contribute to phenotypic variation. To gain this additional understanding we  
709 assessed the genetic architecture of starvation resistance in the DGRP using GWA mapping of  
710 four starvation resistance datasets: new data collected in this study, data from Mackay *et al.*  
711 (2012), data from Everman and Morgan (2018), and a consensus, across-study starvation  
712 resistance measure calculated as the mean response across the three starvation datasets (150  
713 lines were measured across the three studies). Using an FDR threshold of 20%, between 0 and 12  
714 SNPs were associated with starvation resistance in each dataset and sex (Table 3; Table S11).  
715 Aside from 3 SNPs that overlap between the across-study mean dataset and the Mackay *et al.*  
716 (2012) dataset, none of these above-threshold SNPs were the same (Table 3; Table S11). Using  
717 the more lenient significance threshold of  $P < 10^{-5}$  (see Table 3 for the equivalent FDR values),  
718 between 17 and 48 SNPs were associated with starvation resistance for each dataset and sex  
719 (Table 3). However, overlap in associated SNPs among datasets was still minimal (Fig S17). The  
720 SNPs identified using the more lenient significance threshold include all those identified at the  
721 FDR threshold of 20%, so all subsequent analyses are performed on the larger set of associated  
722 SNPs, and we acknowledge that these sets may include larger fractions of false-positive  
723 associations.

724

725

726 **Table 3. Summary of DGRP GWA results and lines measured in this study, Mackay et al. (2012) and**  
 727 **Everman and Morgan (2018).**

| Study <sup>a</sup>               | Significance Threshold             | Equivalent FDR |             | No. Strains | No. SNPs <sup>b</sup> : |      |
|----------------------------------|------------------------------------|----------------|-------------|-------------|-------------------------|------|
|                                  |                                    | Female         | Male        |             | Female                  | Male |
| This Study                       | FDR 0.2                            | -              | -           | 168         | 2                       | 3    |
|                                  | $P < 10^{-5}$                      | 0.78           | 0.79        | 168         | 23                      | 19   |
| <i>Mackay et al. (2012)</i>      | <i>FDR 0.2</i>                     | -              | -           | 203         | 11                      | 0    |
|                                  | <i><math>P &lt; 10^{-5}</math></i> | <i>0.49</i>    | <i>0.82</i> | 203         | 39*                     | 17*  |
| <i>Everman and Morgan (2018)</i> | <i>FDR 0.2</i>                     | -              | -           | 164         | 0                       | 0    |
|                                  | <i><math>P &lt; 10^{-5}</math></i> | <i>0.67</i>    | <i>0.65</i> | 164         | 25*                     | 22*  |
| Across-Study Mean Response       | FDR 0.2                            | -              | -           | 150         | 12                      | 0    |
|                                  | $P < 10^{-5}$                      | 0.43           | 0.80        | 150         | 48                      | 22   |

<sup>a</sup>Text in italics indicates results from the reanalysis of starvation data previously presented by Mackay et al. (2012) and Huang et al. (2014) and Everman and Morgan (2018).

<sup>b</sup>Asterisks indicate results that match those reported in the original studies.

728

729

730

731

732

733

734

735

736

737

738

739

740

741

742

743

744

745

746

747

Across all four datasets reporting starvation resistance in the DGRP, 12 SNPs (associated with seven genes) identified using the  $P < 10^{-5}$  significance threshold fell within QTL intervals identified for starvation resistance in the DSPR (Fig S18; Table S11). In females, one SNP associated with starvation resistance from Mackay *et al.* (2012) is within QTL SA4 (gene *CG30118*), and one SNP associated with starvation resistance in this study is present in QTL SA3 (gene *mbf*). One SNP associated with starvation resistance from Everman and Morgan (2018) is within QTL SB7 (gene *hdc*), and one SNP from the average of starvation resistance across the DGRP datasets is within QTL SB5 (gene *Gbs-76A*). In males, one SNP associated with starvation resistance from Mackay *et al.* (2012) is within QTL SB3 and was not associated with a gene. Four SNPs (one from this study and three from the average of starvation resistance) fell within QTL SB5 and were all near the gene *fz2*; one additional SNP associated with the average of starvation resistance was also within SB5 and was associated with the gene *pip*. One SNP associated with starvation resistance from Everman and Morgan (2018) was within QTL SB6 (gene *beat-Vc*). Only one of these seven genes has been previously associated with starvation resistance (*CG30118*; (Sørensen *et al.* 2007)), and none have reported functions specifically related to starvation resistance or general stress response (FlyBase Curators *et al.* 2004). Furthermore, none of the overlapping genes survived an FDR threshold of 0.2, increasing the possibility that these genes

748 may be false positives. Therefore, with the possible exception of *CG30118*, these genes may not  
749 be promising candidates, despite their overlap among studies.

750         Compared to genes implicated by QTL identified in the DSPR, which include several that  
751 have been previously associated with starvation or related phenotypes (e.g., lifespan or lipid  
752 content), DGRP GWAS hits implicate fewer *a priori* strong candidate genes. Additionally, we did  
753 not observe any GO enrichment following analyses of SNPs associated with the four starvation  
754 resistance datasets, although we acknowledge that the limited number of implicated genes likely  
755 compromised the power of these analyses. Of the total 127 unique genes associated with  
756 starvation resistance in the DGRP across studies and sexes, only two have been previously  
757 identified as associated with starvation resistance in other mapping populations (*CG30118*, *scaf6*;  
758 Table S11; (see Table S2 in Sørensen *et al.* 2007)). More generally, five had previously been  
759 associated with the determination of adult lifespan (e.g. *cnc* and *Egfr*; Table S11; (Sykiotis and  
760 Bohmann 2008; Kamakura 2011)), and 5 have been previously associated with lipid metabolism  
761 or metabolic processes (e.g. *GlcAT-P* and *Ugt86Dj*; Table S11; (FlyBase Curators *et al.* 2004;  
762 Gaudet *et al.* 2010)). Given the relative lack of power of a GWA study using less than 200  
763 genotypes (Long *et al.* 2014), and our use of a permissive genomewide threshold, it could be that  
764 many of the GWAS associations are incorrect, explaining why associations do not typically tag  
765 known candidates. Equally, it could be the case that a series of novel pathways are involved in  
766 natural variation for starvation resistance, and that traditional candidates - often identified via  
767 mutagenesis screens rather than through examination of segregating allelic variation - typically  
768 do not harbor the functional natural variants detectable in a GWAS (Mackay *et al.* 2009).

769         The general lack of correspondence among the loci associated with starvation resistance  
770 in each mapping panel does not invalidate either approach as a strategy to uncover functional  
771 variation. It is likely that many genes contribute to variation in this trait with effects that are  
772 either fairly small, or that have effects only in a specific genetic background (i.e., exhibit genetic  
773 epistasis), and we would not expect to routinely identify such loci. In addition, comparison of the  
774 genetic architecture of quantitative genetic traits across multiple panels is complicated by a  
775 number of additional factors. The genetic structure of the mapping panel (e.g., whether it is a  
776 multiparental panel like the DSPR or a population-based association study panel like the DGRP)

777 influences the analytical strategy, and the power and resolution of mapping (Long et al. 2014).  
778 The complement of alleles present in the panel, and the frequency with which they segregate,  
779 will also affect the ability to identify the same locus across mapping panels (e.g., King and Long  
780 2017). This point is especially true for the comparisons made here, since the DSPR represents a  
781 global sampling of genetic variation represented by the 15 founder strains, whereas the variation  
782 present in the DGRP is a direct reflection of the genetic variability in a single population at a single  
783 point in time. Therefore, a lack of overlap in the identified QTL for a complex, highly-polygenic  
784 trait between the DSPR and the DGRP is perhaps not unexpected.

785

### 786 Repeatability in the SNPs associated with starvation resistance across DGRP studies

787 The public availability of starvation resistance data for the DGRP from multiple studies  
788 provides a novel opportunity to investigate the reliability and repeatability of associations  
789 identified for a classic quantitative trait in the same mapping panel across independent  
790 phenotypic screens (Lithgow *et al.* 2017). Despite the moderately high phenotypic correlation  
791 between starvation resistance measured in the three studies (Fig S8), only a single variant was  
792 implicated in more than one of the three studies (Fig S17).

793 The lack of overlap in SNPs associated with starvation resistance could be due to  
794 differences in the rearing/testing environments of the three studies (discussed above), where  
795 genotype-by-environment effects - often pervasive for complex traits (Gurganus *et al.* 1998) -  
796 could lead to different sites impacting variation in different studies. However, it is potentially  
797 more likely that the sets of associated SNPs have real, but extremely small effects on starvation  
798 resistance variation, and power in a GWA panel of modest size is too low to consistently detect  
799 them (Boyle *et al.* 2017). If true, one would predict that - in contrast to random SNPs - the “top  
800 SNPs” identified within each starvation resistance dataset would have additive effects of the  
801 same sign across all studies. In essence, significantly associated SNPs with positive effects on  
802 starvation resistance from data collected in this study would be expected to have positive  
803 additive effects on starvation resistance measured in Mackay *et al.* (2012) and Everman and  
804 Morgan (2018) more often than expected by random chance.



805 To test this prediction, we first collected the sign of the additive effects of SNPs that  
806 survived the significance threshold ( $P < 10^{-5}$ ) in each dataset for both sexes (Table S11), and  
807 determined whether these top SNPs had additive effects of the same sign in every other dataset.  
808 We then established a null distribution of SNP additive effect signs across pairs of datasets. This  
809 was accomplished by taking samples of 50 SNPs segregating in the DGRP and extracting the sign  
810 of the additive effect of each SNP in the pair of datasets, regardless of the association statistic  
811 for that SNP. The proportion of the 50 SNPs that had a positive additive effect on the trait was  
812 recorded for each of 1000 iterations and used to build an expected distribution of SNP effect sign  
813 sharing for each pair of datasets. We note that to compensate for any allele frequency bias in the  
814 variants that are actually most associated with phenotype, we ensured that the frequencies of  
815 the randomly-sampled SNPs were stratified to match the top 50 SNPs associated with each sex  
816 and dataset (see Materials and Methods; Table S3).

817 Finally, we compared the proportion of top SNPs for which the sign stayed the same  
818 across studies to our expected distribution for each pair of datasets (Fig 8). We found that for the  
819 random samples of SNPs, the probability that the additive effects were positive in both datasets  
820 compared was greater than 50% for most comparisons (distribution means ranging from 45.9-  
821 72.1%; Fig 8). This implies that a random SNP is slightly more likely to have the same sign effect  
822 across data sets, which may be explained in part by the phenotypic correlation between the  
823 datasets (Fig S10). Even given this skew, far more top SNPs than expected by chance had additive  
824 effects of the same sign in each of the other starvation resistance studies (Fig 8; Table S3; Fig  
825 S19). This may suggest that there is phenotypic signal even in SNPs that have very small effects,  
826 and that are not clearly associated with starvation resistance in the GWAS (see Yang *et al.* 2010).  
827 Generally, the consistency of the additive effects of SNPs associated with starvation resistance in  
828 the DGRP calculated across datasets implies that starvation resistance is a highly polygenic trait,  
829 with a large number of QTL with very small effects that influence variation in this trait (Mackay  
830 2004; Boyle *et al.* 2017).

831

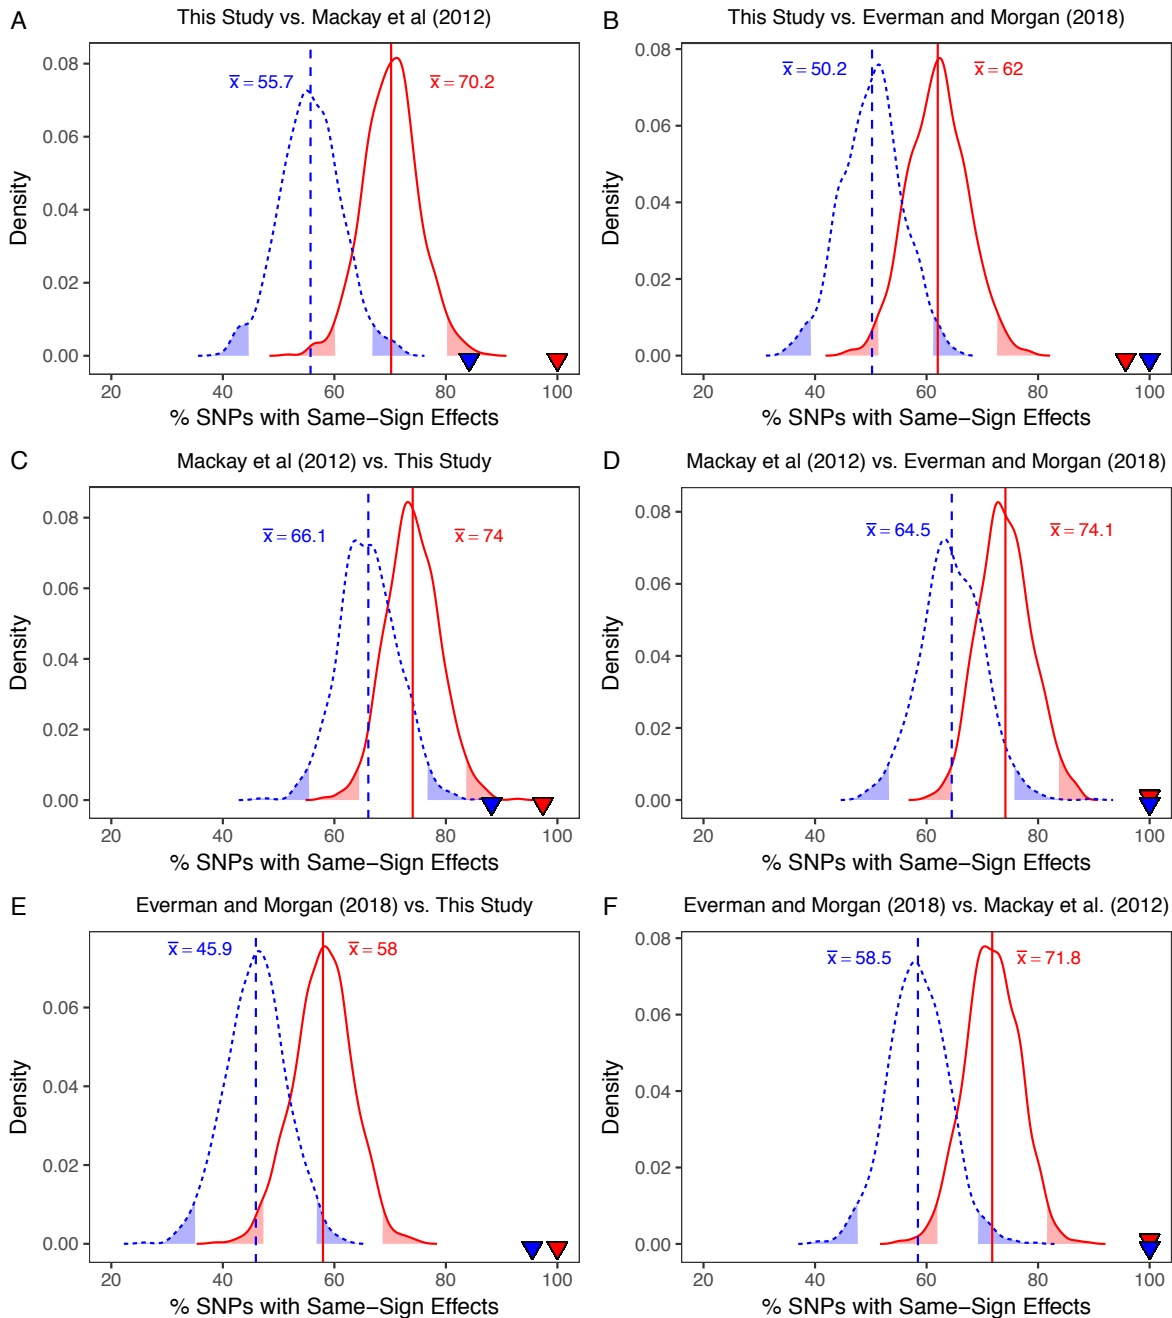

832

833 **Figure 8.** Distribution of the proportion of SNPs that are expected to have additive effects of the same sign  
834 in pairwise comparisons of data from this study, Mackay et al. (2012) and Everman and Morgan (2018).  
835 Data shown were obtained for random samples of 50 SNPs with 1000 iterations. In each plot, red indicates  
836 female data, blue indicates male data, and corresponding vertical lines and text annotation indicate the  
837 mean of the sex-specific samples. The shaded tails represent the upper and lower 95% confidence intervals  
838 of each distribution. The triangles in each plot represent the sex-specific observed proportion of top SNPs  
839 from each GWA analysis ( $P < 10^{-5}$ ) that had additive effects that were the same sign across studies (Fig  
840 S19). For example, in A, 100% of the SNPs associated with female starvation resistance in this study had  
841 additive effects of the same sign when calculated for starvation resistance reported in Mackay et al. (2012).  
842 The dataset comparison is indicated above each plot. In every case, top SNPs from one study were more

843 likely to have the same additive effect sign in a second study than a random set of frequency-matched  
844 SNPs.

845

846

847

## 848 Conclusions

849 In this study, we have described the complex quantitative genetics of starvation  
850 resistance in two large *D. melanogaster* mapping panels that have been thoroughly genomically  
851 characterized. The DSPR and DGRP panels have the advantage of increased, stable genetic  
852 diversity and provide a unique comparison to many previous quantitative genetic studies of  
853 starvation resistance that may be limited by genetic diversity or mapping power. Correlations  
854 between starvation resistance and the additional traits described in this study offer insight into  
855 the genetic control of related stress response traits and provide support for the hypothesis that  
856 the genetic architecture of stress traits varies by population and is dependent upon sex,  
857 environment, and the evolutionary history of the populations studied. The relationships between  
858 the traits analyzed in this study also offer insight into the broader responses of organisms to  
859 starvation stress, given the high conservation of mechanisms related to starvation resistance in  
860 diverse species (Partridge *et al.* 2005; Rion and Kawecki 2007). Here, we have demonstrated that  
861 traits related to survival under starvation conditions, energy storage, activity levels, and survival  
862 under desiccation stress are phenotypically correlated in the DSPR, consistent with previous  
863 artificial selection studies as well as some natural populations. However, we also clearly  
864 demonstrate that starvation resistance and triglyceride level are largely genetically independent  
865 traits, indicating that evolutionary constraint between these two traits is unlikely. We  
866 additionally describe the highly polygenic nature of starvation resistance using the DGRP,  
867 leveraging previously published phenotypes on the same lines to compare the genetic  
868 architecture of the trait across three studies. Our work shows that despite a lack of overlap across  
869 studies in the identity of the variants associated with phenotype at a nominal genomewide  
870 threshold, the sign of the additive effects of such top SNPs are conserved across studies  
871 conducted by different labs. In turn this suggests that these variants do contribute to the  
872 phenotype but have sufficiently small effects that they are not routinely captured following a

873 severe, genomewide correction for multiple tests. From this, we gain a much more detailed  
874 understanding of the genetic control of trait variation in a genetically diverse panel and provide  
875 insight into the utility of across-study and across-panel comparisons.

## 876 Acknowledgments

877

878 We thank Sophia Loschky and Brittny Smith for assistance with data collection, Tony Long and  
879 Libby King for assistance with analysis of early versions of the datasets reported here, and both  
880 John Kelly and Libby King for comments on a previous version of this manuscript. We also thank  
881 two anonymous reviewers and Corbin Jones for their constructive input on an earlier version of  
882 this manuscript. The DGRP collection was purchased from the Bloomington Drosophila Stock  
883 Center (NIH P40 OD018537). The project was supported by NIH grant R01 OD010974 to S.J.M.  
884 and Anthony D. Long. E.R.E. was partially supported by a Postdoctoral Fellowship from the Kansas  
885 INBRE (P20 GM103418).

## References

- Bauerfeind S. S., V. Kellermann, N. N. Moghadam, V. Loeschcke, and K. Fischer, 2014  
Temperature and photoperiod affect stress resistance traits in *Drosophila melanogaster*.  
Physiol. Entomol. 39: 237–246. <https://doi.org/10.1111/phen.12068>
- Bell G., 2010 Fluctuating selection: the perpetual renewal of adaptation in variable  
environments. Philos. Trans. R. Soc. B Biol. Sci. 365: 87–97.  
<https://doi.org/10.1098/rstb.2009.0150>
- Benjamini Y., and Y. Hochberg, 1995 Controlling the false discovery rate: a practical and  
powerful approach to multiple testing. J. R. Stat. Soc. 57: 289–300.
- Benna C., S. Bonaccorsi, C. Wülbeck, C. Helfrich-Förster, M. Gatti, *et al.*, 2010 *Drosophila*  
*timeless2* is required for chromosome stability and circadian photoreception. Curr. Biol.  
20: 346–352. <https://doi.org/10.1016/j.cub.2009.12.048>
- Bergland A. O., E. L. Behrman, K. R. O'Brien, P. S. Schmidt, and D. A. Petrov, 2014 Genomic  
evidence of rapid and stable adaptive oscillations over seasonal time scales in  
*Drosophila*, (D. Bolnick, Ed.). PLoS Genet. 10: e1004775.  
<https://doi.org/10.1371/journal.pgen.1004775>
- Blows M. W., and A. A. Hoffman, 1993 The genetics of central and marginal populations of  
*Drosophila serrata*. I. Genetic variation for stress resistance and species borders.  
Evolution 47: 1255–1270. <https://doi.org/10.2307/2409990>
- Bochdanovits Z., and G. de Jong, 2003 Experimental evolution in *Drosophila melanogaster*:  
interaction of temperature and food quality selection regimes. Evolution 57: 1829–1836.

- Bolukbasi E., S. Vass, N. Cobbe, B. Nelson, V. Simossis, *et al.*, 2012 *Drosophila* poly suggests a novel role for the Elongator complex in insulin receptor-target of rapamycin signalling. *Open Biol.* 2: 110031–110031. <https://doi.org/10.1098/rsob.110031>
- Boyle E. A., Y. I. Li, and J. K. Pritchard, 2017 An expanded view of complex traits: from polygenic to omnigenic. *Cell* 169: 1177–1186. <https://doi.org/10.1016/j.cell.2017.05.038>
- Bubliy O. A., and V. Loeschcke, 2005 Correlated responses to selection for stress resistance and longevity in a laboratory population of *Drosophila melanogaster*. *J. Evol. Biol.* 18: 789–803. <https://doi.org/10.1111/j.1420-9101.2005.00928.x>
- Canty A., and B. Ripley, 2017 boot: Bootstrap R (S-Plus) Functions. R package version 1.3-20
- Chippindale A. K., A. M. Leroi, S. B. Kim, and M. R. Rose, 1993 Phenotypic plasticity and selection in *Drosophila* life-history evolution. I. Nutrition and the cost of reproduction. *J. Evol. Biol.* 6: 171–193. <https://doi.org/10.1046/j.1420-9101.1993.6020171.x>
- Chippindale A. K., T. J. F. Chu, and M. R. Rose, 1996 Complex trade-offs and the evolution of starvation resistance in *Drosophila melanogaster*. *Evolution* 50: 753–766. <https://doi.org/10.2307/2410848>
- Chippindale A. K., A. G. Gibbs, M. Sheik, K. J. Yee, M. Djawdan, *et al.*, 1998 Resource acquisition and the evolution of stress resistance in *Drosophila melanogaster*. *Evolution* 52: 1342. <https://doi.org/10.2307/2411304>
- Clancy D. J., D. Gems, L. G. Harshmann, S. Oldham, H. Stocker, *et al.*, 2001 Extension of life-span by loss of *CHICO* a *Drosophila* insulin receptor substrate protein. *Science* 292: 104–106.

- Cohen J., 1988 *Statistica power for the behavioral sciences*. Lawrence Erlbaum, Hillsdale, NJ.
- Colinet H., T. Chertemps, I. Boulogne, and D. Siaussat, 2015 Age-related decline of abiotic stress tolerance in young *Drosophila melanogaster* adults. *Gerontol. Soc. Am.* 00: 1–7.
- Da Lage J., P. Capy, and J. David, 1990 Starvation and desiccation tolerance in *Drosophila melanogaster*: differences between European, North African and Afrotropical populations. *Genet. Sel. Evol.* 22: 381–391.
- Davidson J. K., 1990 Non-parallel geographic patterns for tolerance to cold and desiccation in *Drosophila melanogaster* and *D. simulans*. *Aust. J. Zool.* 38: 155–161.
- Davison A. C., and D. V. Hinkley, 1997 *Bootstrap methods and their applications*. Cambridge University Press, Cambridge.
- Dijk P. van, G. Staaks, and I. Hardewig, 2002 The effect of fasting and refeeding on temperature preference, activity and growth of roach, *Rutilus rutilus*. *Oecologia* 130: 496–504.  
<https://doi.org/10.1007/s00442-001-0830-3>
- Djawdan M., M. R. Rose, and T. J. Bradley, 1997 Does selection for stress resistance lower metabolic rate? *Ecology* 78: 828–837. <https://doi.org/10.2307/2266062>
- Djawdan M., A. K. Chippindale, M. R. Rose, and T. J. Bradley, 1998 Metabolic reserves and evolved stress resistance in *Drosophila melanogaster*. *Physiol. Zool.* 71: 584–594.
- Evans K. S., S. C. Brady, J. S. Bloom, R. E. Tanny, D. E. Cook, *et al.*, 2018 Shared genomic regions underlie natural variation in diverse toxin responses. *Genetics* 210: 1509-1525.  
<https://doi.org/10.1534/genetics.118.301311>

- Everman E. R., and T. J. Morgan, 2018 Antagonistic pleiotropy and mutation accumulation contribute to age-related decline in stress response. *Evolution* 72: 303–317.  
<https://doi.org/10.1111/evo.13408>
- Falconer D. S., and T. F. C. Mackay, 1996 *Quantitative genetics*. Longman Group, Ltd., Essex, England.
- FlyBase Curators, Swiss-Prot Project Members, and InterPro Project Members, 2004 Gene Ontology in FlyBase through association of InterPro record with GO terms
- Gaudet P., M. Livstone, and P. Thomas, 2010 Gene Ontology annotation inferences using phylogenetic trees. *Go Ref. Genome Proj.*
- Gilchrist G. W., L. M. Jeffers, B. West, D. G. Folk, J. Suess, *et al.*, 2008 Clinal patterns of desiccation and starvation resistance in ancestral and invading populations of *Drosophila subobscura*. *Evol. Appl.* 1: 513–523. <https://doi.org/10.1111/j.1752-4571.2008.00040.x>
- Giraud H., C. Lehermeier, E. Bauer, M. Falque, V. Segura, *et al.*, 2014 Linkage disequilibrium with linkage analysis of multiline crosses reveals different multiallelic QTL for hybrid performance in the flint and dent heterotic groups of maize. *Genetics* 198: 1717–1734.  
<https://doi.org/10.1534/genetics.114.169367>
- Goenaga J., J. J. Fanara, and E. Hasson, 2013 Latitudinal variation in starvation resistance is explained by lipid content in natural populations of *Drosophila melanogaster*. *Evol. Biol.* 40: 601–612. <https://doi.org/10.1007/s11692-013-9235-6>
- Griffin P. C., S. B. Hangartner, A. Fournier-Level, and A. A. Hoffmann, 2017 Genomic trajectories to desiccation resistance: convergence and divergence among replicate



selected *Drosophila* lines. *Genetics* 205: 871–890.

<https://doi.org/10.1534/genetics.116.187104>

Gurganus M. C., J. D. Fry, S. V. Nuzhdin, E. G. Pasyukova, R. F. Lyman, *et al.*, 1998 Genotype-environment interaction at quantitative trait loci affecting sensory bristle number in *Drosophila melanogaster*. *Genetics* 149: 1883–1898.

Harbison S. T., A. H. Yamamoto, J. J. Fanara, K. K. Norga, and T. F. Mackay, 2004 Quantitative trait loci affecting starvation resistance in *Drosophila melanogaster*. *Genetics* 166: 1807–1823.

Harbison S. T., S. Chang, K. P. Kamdar, and T. F. Mackay, 2005 Quantitative genomics of starvation stress resistance in *Drosophila*. *Genome Biol.* 6: R36.

<https://doi.org/10.1186/gb-2005-6-4-r36>

Hardy C. M., R. T. Birse, M. J. Wolf, L. Yu, R. Bodmer, *et al.*, 2015 Obesity-associated cardiac dysfunction in starvation-selected *Drosophila melanogaster*. *Am. J. Physiol. - Regul. Integr. Comp. Physiol.* 309: R658–R667. <https://doi.org/10.1152/ajpregu.00160.2015>

Hardy C. M., M. K. Burke, L. J. Everett, M. V. Han, K. M. Lantz, *et al.*, 2018 Genome-wide analysis of starvation-selected *Drosophila melanogaster*—a genetic model of obesity. *Mol. Biol. Evol.* 35: 50–65. <https://doi.org/10.1093/molbev/msx254>

Harshman, Hoffmann, and Clark, 1999 Selection for starvation resistance in *Drosophila melanogaster*: physiological correlates, enzyme activities and multiple stress responses. *J. Evol. Biol.* 12: 370–379. <https://doi.org/10.1046/j.1420-9101.1999.00024.x>

- Herewege J. van, and J. R. David, 1997 Starvation and desiccation tolerances in *Drosophila*: comparison of species from different climatic origins. *Écoscience* 4: 151–157.
- Highfill C. A., G. A. Reeves, and S. J. Macdonald, 2016 Genetic analysis of variation in lifespan using a multiparental advanced intercross *Drosophila* mapping population. *BMC Genet.* 17. <https://doi.org/10.1186/s12863-016-0419-9>
- Hoffmann A. A., and P. A. Parsons, 1989a Selection for increased desiccation resistance in *Drosophila melanogaster*: additive genetic control and correlated responses for other stresses. *Genetics* 122: 837–845.
- Hoffmann A. A., and P. A. Parsons, 1989b An integrated approach to environmental stress tolerance and life-history variation: desiccation tolerance in *Drosophila*. *Biol. J. Linn. Soc.* 37: 117–136. <https://doi.org/10.1111/j.1095-8312.1989.tb02098.x>
- Hoffmann A. A., and P. A. Parsons, 1991 *Evolutionary genetics and environmental stress*. Oxford University Press, Oxford.
- Hoffmann A. A., and P. A. Parsons, 1993 Direct and correlated responses to selection for desiccation resistance: a comparison of *Drosophila melanogaster* and *D. simulans*. *J. Evol. Biol.* 6: 643–657.
- Hoffmann A. A., and L. G. Harshman, 1999 Desiccation and starvation resistance in *Drosophila*: patterns of variation at the species, population and intrapopulation levels. *Heredity* 83: 637–643.
- Hoffmann A. A., R. Hallas, C. Sinclair, and P. Mitrovski, 2001 Levels of variation in stress resistance in *Drosophila* among strains, local populations, and geographic regions:

- patterns for desiccation, starvation, cold resistance, and associated traits. *Evolution* 55: 1621–1630.
- Hoffmann A. A., J. Shirriffs, and M. Scott, 2005a Relative importance of plastic vs genetic factors in adaptive differentiation: geographical variation for stress resistance in *Drosophila melanogaster* from eastern Australia. *Funct. Ecol.* 19: 222–227. <https://doi.org/10.1111/j.1365-2435.2005.00959.x>
- Hoffmann A. A., R. Hallas, A. R. Anderson, and M. Telonis-Scott, 2005b Evidence for a robust sex-specific trade-off between cold resistance and starvation resistance in *Drosophila melanogaster*. *J. Evol. Biol.* 18: 804–810. <https://doi.org/10.1111/j.1420-9101.2004.00871.x>
- Huang W., A. Massouras, Y. Inoue, J. Peiffer, M. Ràmia, *et al.*, 2014 Natural variation in genome architecture among 205 *Drosophila melanogaster* Genetic Reference Panel lines. *Genome Res.* 24: 1193–1208. <https://doi.org/10.1101/gr.171546.113>
- Jumbo-Lucioni P., J. F. Ayroles, M. Chambers, K. W. Jordan, J. Leips, *et al.*, 2010 Systems genetics analysis of body weight and energy metabolism traits in *Drosophila melanogaster*. *BMC Genomics* 11: 297. <https://doi.org/10.1186/1471-2164-11-297>
- Kamakura M., 2011 Royalactin induces queen differentiation in honeybees. *Nature* 473: 478–483. <https://doi.org/10.1038/nature10093>
- Kang L., D. D. Aggarwal, E. Rashkovetsky, A. B. Korol, and P. Michalak, 2016 Rapid genomic changes in *Drosophila melanogaster* adapting to desiccation stress in an experimental evolution system. *BMC Genomics* 17. <https://doi.org/10.1186/s12864-016-2556-y>

- Karan D., N. Dahiya, A. K. Munjal, P. Gibert, B. Moreteau, *et al.*, 1998 Desiccation and starvation tolerance of adult *Drosophila*: opposite latitudinal clines in natural populations of three different species. *Evolution* 52: 825–831. <https://doi.org/10.2307/2411276>
- Karan D., and R. Parkash, 1998 Desiccation tolerance and starvation resistance exhibit opposite latitudinal clines in Indian geographical populations of *Drosophila kikkawai*. *Ecol. Entomol.* 23: 391–396.
- Kennington W. J., A. S. Gilchrist, D. B. Goldstein, and L. Partridge, 2001 The genetic basis of divergence in desiccation and starvation resistance among tropical and temperate populations of *Drosophila melanogaster*. *Heredity* 87: 363–372.
- King E. G., S. J. Macdonald, and A. D. Long, 2012a Properties and power of the *Drosophila* Synthetic Population Resource for the routine dissection of complex traits. *Genetics* 191: 935–949. <https://doi.org/10.1534/genetics.112.138537>
- King E. G., C. M. Merkes, C. L. McNeil, S. R. Hooper, S. Sen, *et al.*, 2012b Genetic dissection of a model complex trait using the *Drosophila* Synthetic Population Resource. *Genome Res.* 22: 1558–1566. <https://doi.org/10.1101/gr.134031.111>
- King E. G., and A. D. Long, 2017 The Beavis effect in next-generation mapping panels in *Drosophila melanogaster*. *G3 Genes Genomes Genet.* 7: 1643–1652.
- Lee K. P., and T. Jang, 2014 Exploring the nutritional basis of starvation resistance in *Drosophila melanogaster*, (G. Davidowitz, Ed.). *Funct. Ecol.* 28: 1144–1155. <https://doi.org/10.1111/1365-2435.12247>

Lighton J. R. B., and G. A. Bartholomew, 1988 Standard energy metabolism of a desert harvester ant, *Pogonomyrmex rugosus*: Effects of temperature, body mass, group size, and humidity. *Proc. Natl. Acad. Sci. U. S. A.* 85: 4765–4769.

Lin Y. J., L. Seroude, and S. Benzer, 1998 Extended life-span and stress resistance in the *Drosophila* mutant *methuselah*. *Science* 282: 943–946.

Lithgow G. J., M. Driscoll, and P. Phillips, 2017 A long journey to reproducible results. *Nat. News* 548: 387.

Long A. D., S. J. Macdonald, and E. G. King, 2014 Dissecting complex traits using the *Drosophila* Synthetic Population Resource. *Trends Genet.* 30: 488–495.  
<https://doi.org/10.1016/j.tig.2014.07.009>

Lüdecke D., 2018 sjstats: Statistical functions for regression models (Version 0.17.2).  
<https://doi.org/10.5281/zenodo.1284472>

Lynch M., and B. Walsh, 1998 *Genetic and Analysis of Quantitative Traits*. Sinauer, Sunderland, MA.

Mackay T., 2004 The genetic architecture of quantitative traits: lessons from *Drosophila*. *Curr. Opin. Genet. Dev.* 14: 253–257. <https://doi.org/10.1016/j.gde.2004.04.003>

Mackay T. F. C., E. A. Stone, and J. F. Ayroles, 2009 The genetics of quantitative traits: challenges and prospects. *Nat. Rev. Genet.* 10: 565–577. <https://doi.org/10.1038/nrg2612>

Mackay T. F. C., S. Richards, E. A. Stone, A. Barbadilla, J. F. Ayroles, *et al.*, 2012 The *Drosophila melanogaster* Genetic Reference Panel. *Nature* 482: 173–178.  
<https://doi.org/10.1038/nature10811>

- Mackay T. F. C., 2014 Epistasis and quantitative traits: using model organisms to study gene–gene interactions. *Nat. Rev. Genet.* 15: 22–33. <https://doi.org/10.1038/nrg3627>
- Marriage T. N., E. G. King, A. D. Long, and S. J. Macdonald, 2014 Fine-mapping nicotine resistance loci in *Drosophila* using a multiparent advanced generation inter-cross population. *Genetics* 198: 45–57. <https://doi.org/10.1534/genetics.114.162107>
- Marron M. T., T. A. Markow, K. J. Kain, and A. G. Gibbs, 2003 Effects of starvation and desiccation on energy metabolism in desert and mesic *Drosophila*. *J. Insect Physiol.* 49: 261–270.
- Masek P., L. A. Reynolds, W. L. Bollinger, C. Moody, A. Mehta, *et al.*, 2014 Altered regulation of sleep and feeding contributes to starvation resistance in *Drosophila melanogaster*. *J. Exp. Biol.* 217: 3122–3132. <https://doi.org/10.1242/jeb.103309>
- McCue M. D., 2010 Starvation physiology: reviewing the different strategies animals use to survive a common challenge. *Comp. Biochem. Physiol. A. Mol. Integr. Physiol.* 156: 1–18. <https://doi.org/10.1016/j.cbpa.2010.01.002>
- Melcher C., and M. J. Pankratz, 2005 Candidate gustatory interneurons modulating feeding behavior in the *Drosophila* brain, (M. Bate, Ed.). *PLoS Biol.* 3: e305. <https://doi.org/10.1371/journal.pbio.0030305>
- Michalak P., L. Kang, M. F. Schou, H. R. Garner, and V. Loeschcke, 2018 Genomic signatures of experimental adaptive radiation in *Drosophila*. *Mol. Ecol.* <https://doi.org/10.1111/mec.14917>

Morozova T. V., T. F. C. Mackay, and R. R. H. Anholt, 2014 Genetics and genomics of alcohol sensitivity. *Mol. Genet. Genomics* 289: 253–269. <https://doi.org/10.1007/s00438-013-0808-y>

Murphey R. M., and C. F. Hall, 1969 Some correlates of negative geotaxis in *Drosophila melanogaster*. *Anim. Behav.* 17: 181–185.

Najarro M. A., J. L. Hackett, B. R. Smith, C. A. Highfill, E. G. King, *et al.*, 2015 Identifying loci contributing to natural variation in xenobiotic resistance in *Drosophila*, (N. Singh, Ed.). *PLOS Genet.* 11: e1005663. <https://doi.org/10.1371/journal.pgen.1005663>

Najarro M. A., J. L. Hackett, and S. J. Macdonald, 2017 Loci contributing to boric acid toxicity in two reference populations of *Drosophila melanogaster*. *G3 Genes Genomes Genet.* 7: 1631–1641.

Nuzhdin S. V., L. G. Harshman, M. Zhou, and K. Harmon, 2007 Genome-enabled hitchhiking mapping identifies QTLs for stress resistance in natural *Drosophila*. *Heredity* 99: 313–321. <https://doi.org/10.1038/sj.hdy.6801003>

Obata F., E. Kuranaga, K. Tomioka, M. Ming, A. Takeishi, *et al.*, 2014 Necrosis-driven systemic immune response alters SAM metabolism through the FOXO-GNMT axis. *Cell Rep.* 7: 821–833. <https://doi.org/10.1016/j.celrep.2014.03.046>

Obata F., and M. Miura, 2015 Enhancing S-adenosyl-methionine catabolism extends *Drosophila* lifespan. *Nat. Commun.* 6. <https://doi.org/10.1038/ncomms9332>

- Paik D., Y. G. Jang, Y. E. Lee, Y. N. Lee, R. Yamamoto, *et al.*, 2012 Misexpression screen delineates novel genes controlling *Drosophila* lifespan. *Mech. Ageing Dev.* 133: 234–245.
- Paradis E., J. Claude, and K. Strimmer, 2004 APE: analysis of phylogenetics and evolution in R language. *Bioinformatics* 20: 289–290.
- Partridge L., M. D. W. Piper, and W. Mair, 2005 Dietary restriction in *Drosophila*. *Mech. Ageing Dev.* 126: 938–950. <https://doi.org/10.1016/j.mad.2005.03.023>
- Pijpe J., P. M. Brakefield, and B. J. Zwaan, 2007 Phenotypic plasticity of starvation resistance in the butterfly *Bicyclus anynana*. *Evol. Ecol.* 21: 589–600. <https://doi.org/10.1007/s10682-006-9137-5>
- Pinheiro J., D. Bates, S. DebRoy, D. Sarkar, and R Core Team, 2017 nlme: linear and nonlinear mixed effects models. R Package Version 31-131.
- Quinn G. P., and M. J. Keough, 2002 *Experimental design and data analysis for biologists*. Cambridge University Press, New York.
- R Core Team, 2017 *R: A language and environment for statistical computing*. R Foundation for Statistical Computing, Vienna, Austria.
- Rajpurohit S., E. Gefen, A. O. Bergland, D. A. Petrov, A. G. Gibbs, *et al.*, 2018 Spatiotemporal dynamics and genome-wide association analysis of desiccation tolerance in *Drosophila melanogaster*. *Mol. Ecol.* 27: 3525–3540. <https://doi.org/10.1111/mec.14814>



Rion S., and T. J. Kawecki, 2007 Evolutionary biology of starvation resistance: what we have learned from *Drosophila*. *J. Evol. Biol.* 20: 1655–1664. <https://doi.org/10.1111/j.1420-9101.2007.01405.x>

Robinson S. J., Zwaan, B J, and Partridge, L., 2000 Starvation resistance and adult body composition in a latitudinal cline of *Drosophila melanogaster*. *Evolution* 54: 1819–1824.

Rose M. R., L. N. Vu, S. U. Park, and J. L. Graves, Jr, 1992 Selection on stress resistance increases longevity in *Drosophila melanogaster*. *Exp. Gerontol.* 27: 241–250.

Schmidt P. S., L. Matzkin, M. Ippolito, and W. F. Eanes, 2005 Geographic variation in diapause incidence, life-history traits, and climatic adaptation in *Drosophila melanogaster*. *Evolution* 59: 1721–1732.

Schwasinger-Schmidt T. E., S. D. Kachman, and L. G. Harshman, 2012 Evolution of starvation resistance in *Drosophila melanogaster*: measurement of direct and correlated responses to artificial selection. *J. Evol. Biol.* 25: 378–387. <https://doi.org/10.1111/j.1420-9101.2011.02428.x>

Seay D. J., and C. S. Thummel, 2011 The circadian clock, light, and cryptochrome regulate feeding and metabolism in *Drosophila*. *J. Biol. Rhythms* 26: 497–506. <https://doi.org/10.1177/0748730411420080>

Service P. M., E. W. Hutchinson, M. D. MacKinley, and M. R. Rose, 1985 Resistance to environmental stress in *Drosophila melanogaster* selected for postponed senescence. *Physiol. Zool.* 58: 380–389.

- Service P. M., and M. R. Rose, 1985 Genetic covariation among life-history components: the effect of novel environments. *Evolution* 39: 943. <https://doi.org/10.2307/2408694>
- Sheeba V., V. K. Sharma, K. Shubha, M. K. Chandrashekar, and A. Joshi, 2000 The effect of different light regimes on adult lifespan in *Drosophila melanogaster* is partly mediated through reproductive output. *J. Biol. Rhythms* 15: 380–392.
- Simonsen A., R. C. Cumming, K. Lindmo, V. Galaviz, S. Cheng, *et al.*, 2006 Genetic modifiers of the *Drosophila Blue Cheese* gene link defects in lysosomal transport with decreased life span and altered ubiquitinated-protein profiles. *Genetics* 176: 1283–1297. <https://doi.org/10.1534/genetics.106.065011>
- Slocumb M. E., J. M. Regalado, M. Yoshizawa, G. G. Neely, P. Masek, *et al.*, 2015 Enhanced sleep is an evolutionarily adaptive response to starvation stress in *Drosophila*. *PloS One* 10: e0131275.
- Sørensen J. G., M. M. Nielsen, and V. Loeschcke, 2007 Gene expression profile analysis of *Drosophila melanogaster* selected for resistance to environmental stressors. *J. Evol. Biol.* 20: 1624–1636. <https://doi.org/10.1111/j.1420-9101.2007.01326.x>
- Sykiotis G. P., and D. Bohmann, 2008 Keap1/Nrf2 signalling regulates oxidative stress tolerance and lifespan *Drosophila*. *Dev Cell* 14: 76–85.
- Telonis-Scott M., M. Gane, S. DeGaris, C. M. Sgrò, and A. A. Hoffmann, 2012 High resolution mapping of candidate alleles for desiccation resistance in *Drosophila melanogaster* under selection. *Mol. Biol. Evol.* 29: 1335–1351. <https://doi.org/10.1093/molbev/msr294>

Telonis-Scott M., C. M. Sgrò, A. A. Hoffmann, and P. C. Griffin, 2016 Cross-study comparison reveals common genomic, network, and functional signatures of desiccation resistance in *Drosophila melanogaster*. *Mol. Biol. Evol.* 33: 1053–1067.

<https://doi.org/10.1093/molbev/msv349>

Toda M. J., and M. T. Kimura, 1997 Life-history traits related to host selection in mycophagous drosophilids. *J. Anim. Ecol.* 66: 154–166. <https://doi.org/10.2307/6018>

UniProt Curators, 2002 Manual transfer of experimentally-verified manual GO annotation data to orthologs by curator judgment of sequence similarity

Xu K., X. Zheng, and A. Sehgal, 2008 Regulation of feeding and metabolism by neuronal and peripheral clocks in *Drosophila*. *Cell Metab.* 8: 289–300.

<https://doi.org/10.1016/j.cmet.2008.09.006>

Yang J., B. Benyamin, B. P. McEvoy, S. Gordon, A. K. Henders, *et al.*, 2010 Common SNPs explain a large proportion of heritability for human height. *Nat. Genet.* 42: 565–569.

<https://doi.org/10.1038/ng.608>

## Supplemental Figures

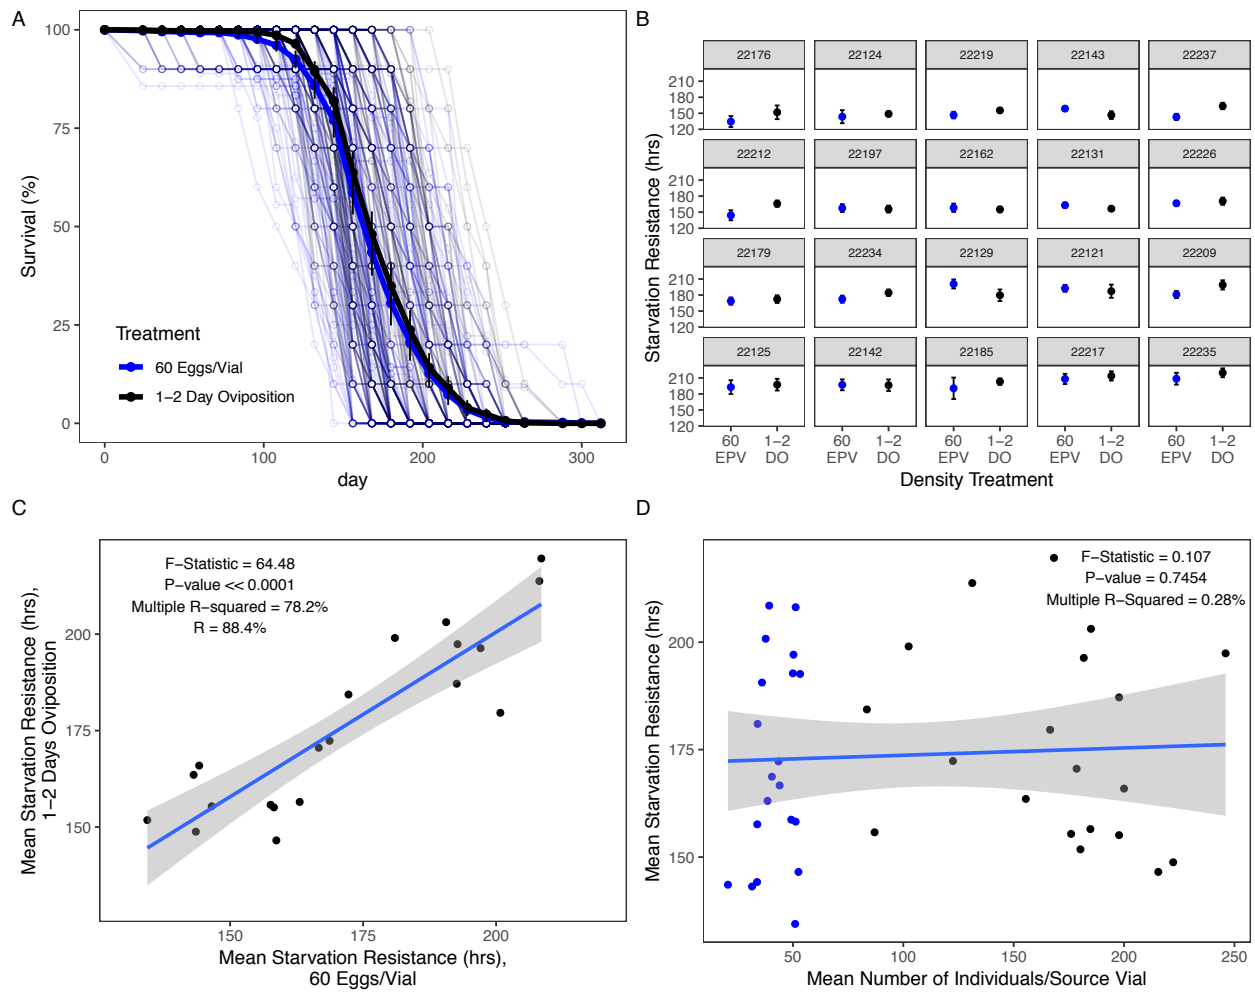

**Figure S1.** Egg density in vials used to generate experimental individuals has a limited influence on starvation resistance. This was tested in 20 randomly-selected DSPR RILs by rearing experimental individuals according to two treatments: with 60 eggs per vial (60 EPV) or with 1-2 days of oviposition (1-2 DO). The total number of adults emerging from each source vial was also counted. Starvation resistance of the experimental individuals from each density treatment was measured as described for the large-scale starvation screen. **A.** Percent survival per vial at each 12-hr assessment point was very similar throughout the course of this experiment regardless of rearing density. Bold lines and points indicate the overall mean ( $\pm 95\%$  CI) survival for each treatment group at each 12-hr assessment point. **B.** Mean ( $\pm 95\%$  CI) starvation resistance for each of the 20 randomly-selected DSPR RILs was rarely influenced by the density treatment. Overall, density treatment had a minor effect on the average lifespan of each DSPR RIL ( $F_{1,19} = 18.15$ ,  $P < 0.0001$ , % Variance Explained = 0.90%; see Table S1 for full breakdown of variance components). **C.** Mean starvation resistance by DSPR RIL was strongly correlated between the two density treatments. **D.** The mean number of individuals per source vial of experimental flies did not explain a significant amount of variation in starvation resistance. In **A**, **B**, and **D**, black corresponds to the 1-2 day oviposition treatment; blue corresponds to the 60 eggs per vial treatment. In **C** and **D**, grey shading represents the 95% CI of the regression.

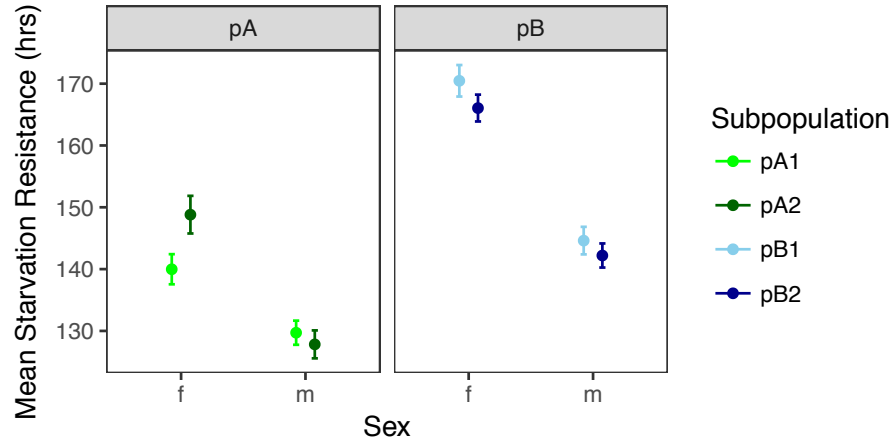

**Figure S2.** Mean ( $\pm$  95% CI) starvation resistance per subpopulation and sex. Sex and subpopulation interact to influence starvation resistance ( $F_{3,3440} = 18.317$ ;  $p < 0.0001$ ), though only females from the pA1 and pA2 subpopulations were significantly different within a panel (Tukey's HSD adj.  $p < 0.0001$ ).

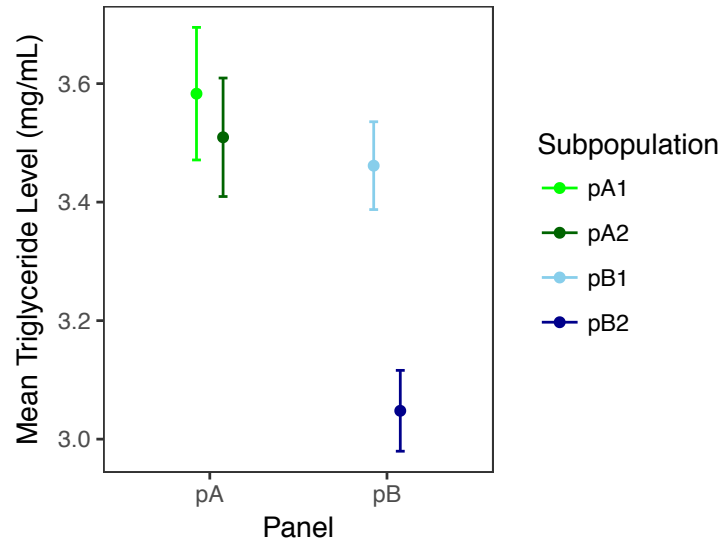

**Figure S3.** Mean female triglyceride level per subpopulation ( $\pm$  95% CI). Subpopulation influenced triglyceride level ( $F_{3,935} = 37.099$ ;  $p < 0.0001$ ), though this was driven by differences between the pB subpopulations (Tukey's HSD adj.  $p < 0.0001$ )

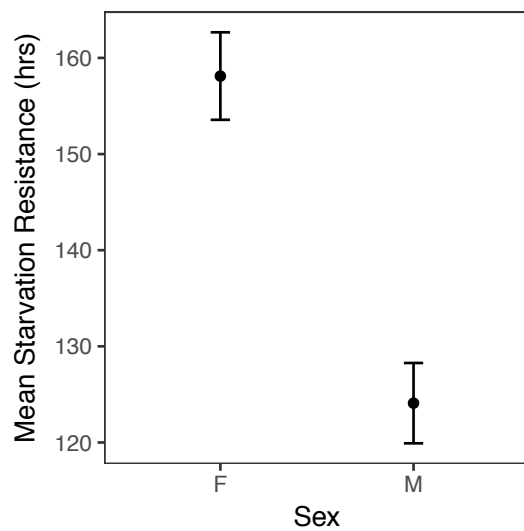

**Figure S4.** Mean starvation resistance ( $\pm$  95% CI) for males and females in the DGRP ( $F_{1,334} = 118.21$ ,  $p < 0.0001$ ).

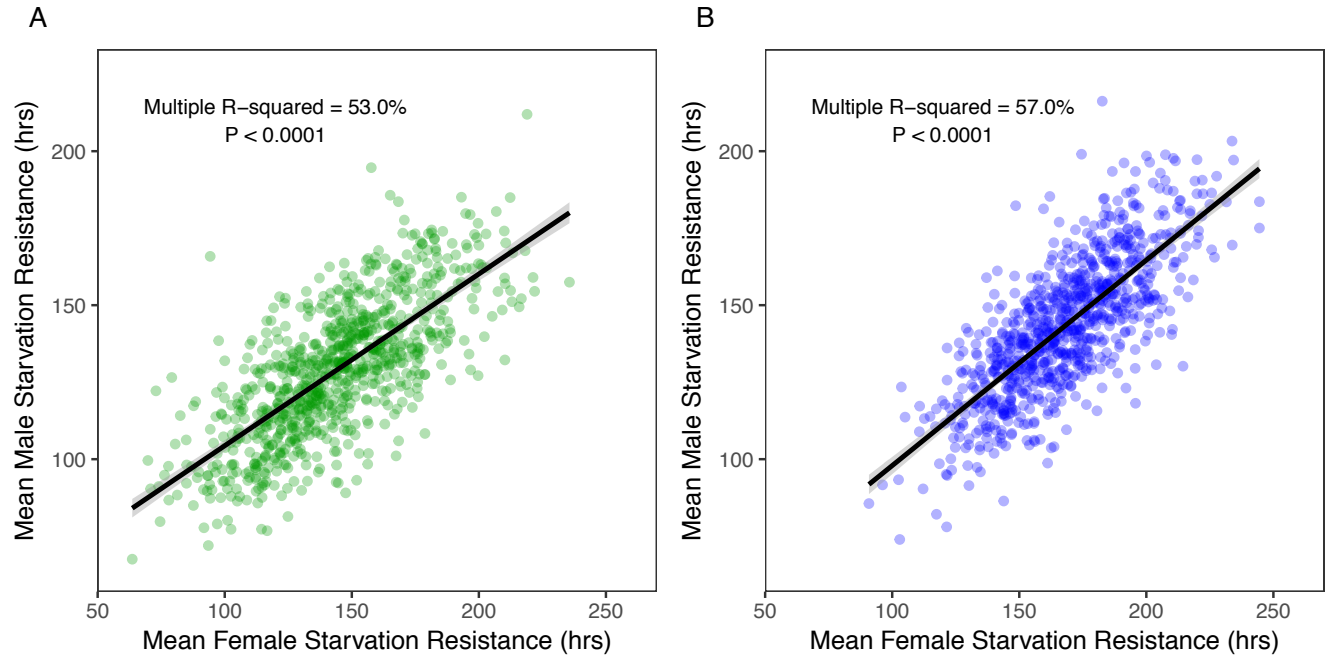

**Figure S5.** Correlation between sex-specific mean starvation resistance for the DSPR pA mapping panel (A) and pB mapping panel (B). Sex-specific responses were significantly correlated for both panels (pA:  $F_{1,859} = 968.5$ ,  $P < 0.0001$ ; pB:  $F_{1,860} = 1138$ ,  $p < 0.0001$ ). Grey shading around the regression line in both plots indicates the 95% confidence interval.



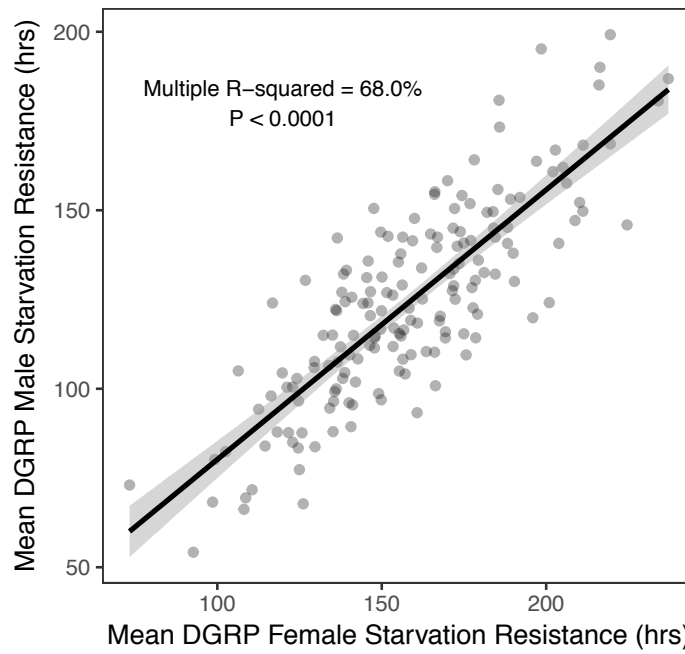

**Figure S6.** Male and female mean starvation resistance was significantly correlated in the DGRP ( $F_{1,334} = 118.21$ ,  $P < 0.0001$ ). Grey shading around the regression line indicates the 95% confidence interval.

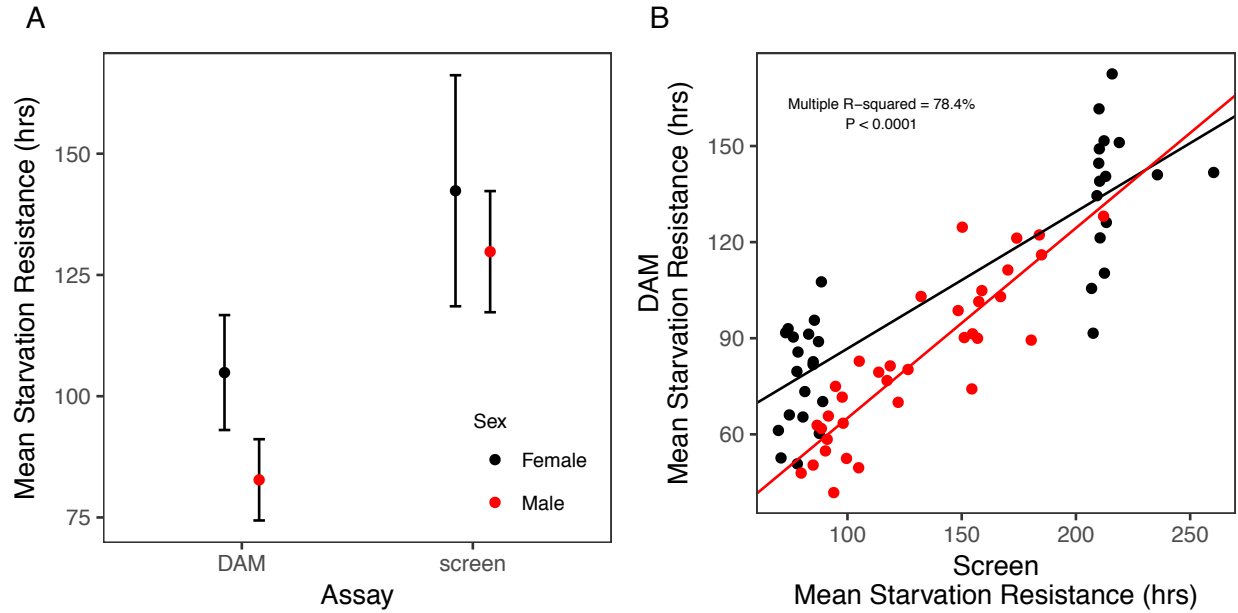

**Figure S7.** A. Starvation resistance was significantly higher in the large-scale starvation screen of all DSPR RILs compared to the DAM (*Drosophila* Activity Monitor) starvation assay for the selected subset of RILs (Assay:  $F_{1,136} = 31.60$ ,  $p < 0.0001$ ). Mean starvation resistance across RIL means is presented ( $\pm 95\%$  CI). B. Mean starvation resistance measured in the large-scale starvation resistance screen (x-axis) was correlated with mean starvation resistance measured in the DAM assay (y-axis) in the DSPR (Females:  $\beta = 0.43 \pm 0.04$ ,  $t = 9.7$ ,  $p < 0.0001$ ,  $R^2 = 73.9\%$ ; Males:  $\beta = 0.59 \pm 0.05$ ,  $t = 10.9$ ,  $p < 0.0001$ ,  $R^2 = 78.3\%$ ). The multiple  $R^2$  value in the plot includes the interaction between starvation resistance measured under different assay conditions with sex.

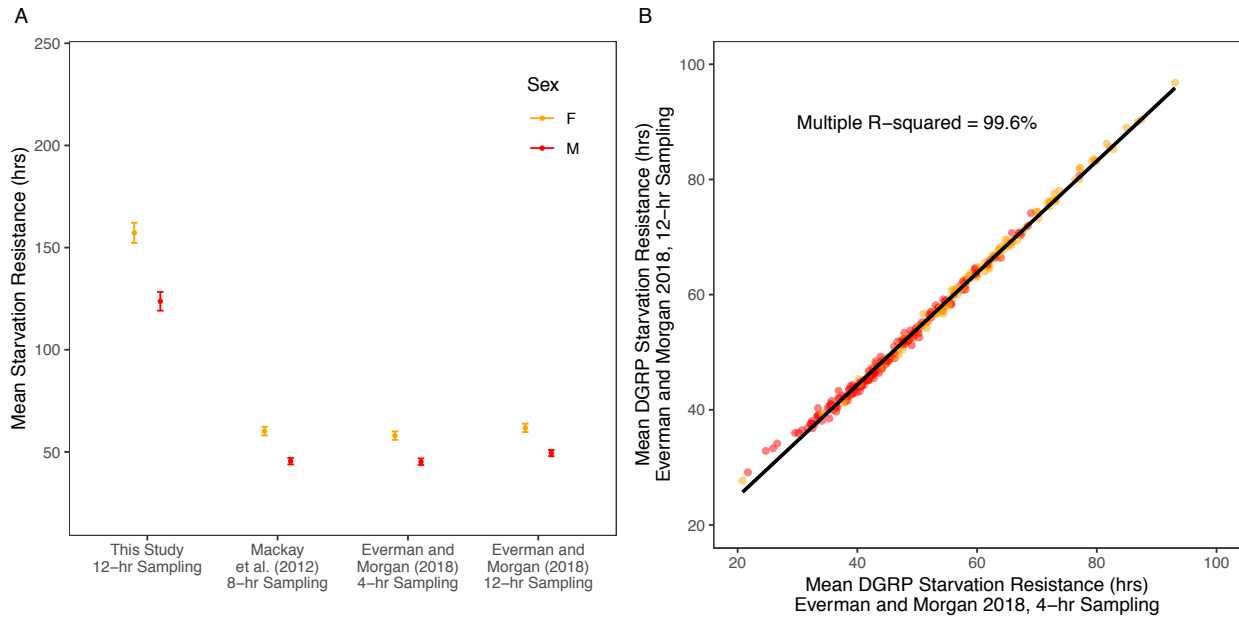

**Figure S8.** A. Mean starvation resistance ( $\pm$  95% CI) was significantly higher in this study compared to Mackay et al. (2012) and Everman and Morgan (2018) ( $F_{2,532} = 1457.5$ ,  $P < 0.0001$ ). The increased mean and variation in starvation resistance observed in this study was not driven by differences in the frequency at which survival was assessed, since a re-analysis of data from Everman and Morgan (2018) with a longer interval between fly counting events matching the interval from the present study, revealed essentially no difference in the phenotypes assayed. B. Mean starvation resistance by line and sex measured according to the 4-hr sampling interval was highly correlated to our re-analysis of the Everman and Morgan (2018) data using a 12-hr sampling interval.

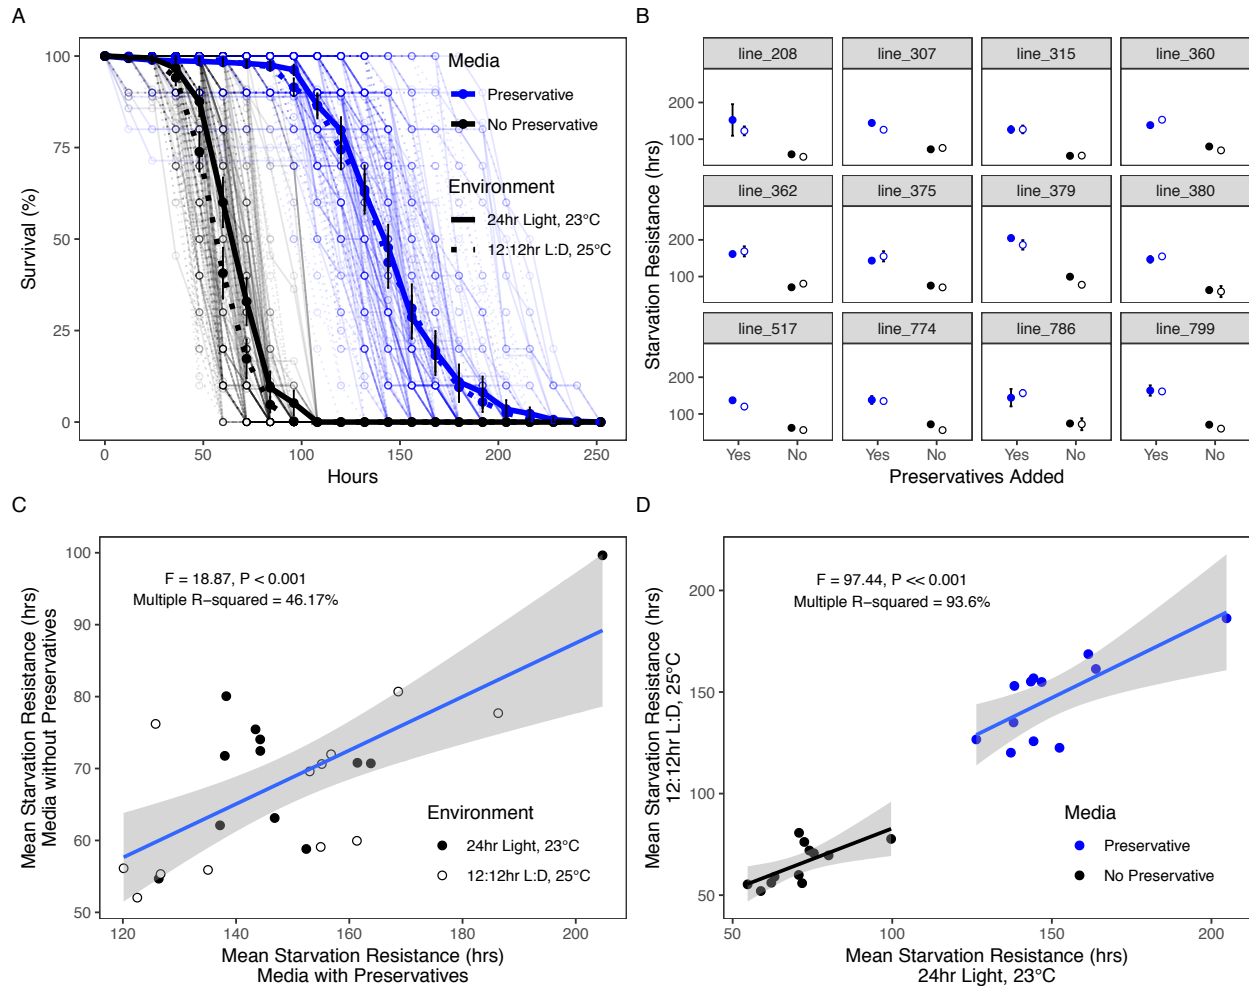

**Figure S9.** Flies maintained on starvation media with preservatives lived much longer than flies on starvation media without preservatives, regardless of environmental conditions (24-hr light, 23°C as used in the large-scale starvation screen vs. 12:12hr L:D, 25°C as used in Mackay et al. (2012) and Everman and Morgan (2018)). This was tested in 12 randomly-selected DGRP lines. A. Percent survival per vial was different between the two media treatments, and differed slightly due to environment, but only when media did not contain preservatives. Black lines and points indicate media with no preservatives; blue lines and points indicate media with preservatives; solid lines indicate the 24hr Light, 23°C environment; dashed lines indicate the 12:12hr L:D, 25°C treatment. The bold points and lines for each treatment indicate the overall mean ( $\pm 95\%$  CI) survival of each treatment group at each 12-hr assessment point. B. Mean ( $\pm 95\%$  CI) starvation resistance for each of the 12 randomly selected DGRP lines was rarely influenced by the environment treatment (closed symbols = 24hr Light, 23°C; open symbols = 12:12hr L:D, 25°C), but media preservatives consistently resulted in higher survival for each DGRP line. C. Mean starvation resistance by DGRP line was significantly correlated between the two media treatments. D. DGRP line, preservatives in the media, and environmental conditions together explained nearly all phenotypic variation in starvation resistance. The full reporting of variance components is presented in Table S6. In C and D, grey shading represents the 95% CI of the regression.

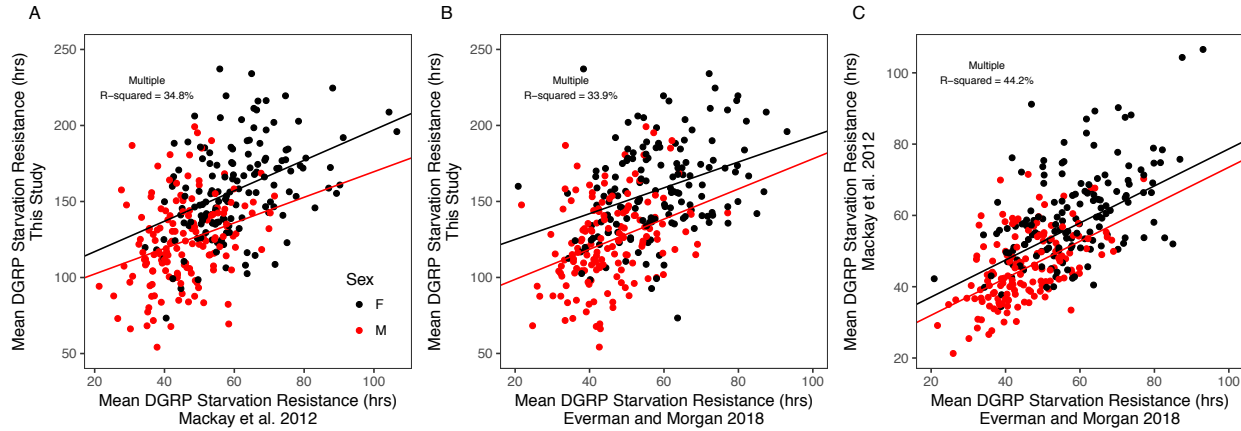

**Figure S10.** Correlation between sex-specific mean starvation resistance in the DGRP panel for 150 lines that overlap between this study, Mackay et al. 2012, and Everman and Morgan 2018. Red points indicate males and black points indicate females. All comparisons showed that the three independent measures of starvation resistance were significantly correlated (A:  $F_{3,296} = 52.69$ ,  $p < 0.0001$ ; B:  $F_{3,296} = 50.66$ ,  $p < 0.0001$ ; C:  $F_{3,296} = 78.18$ ,  $p < 0.0001$ ).

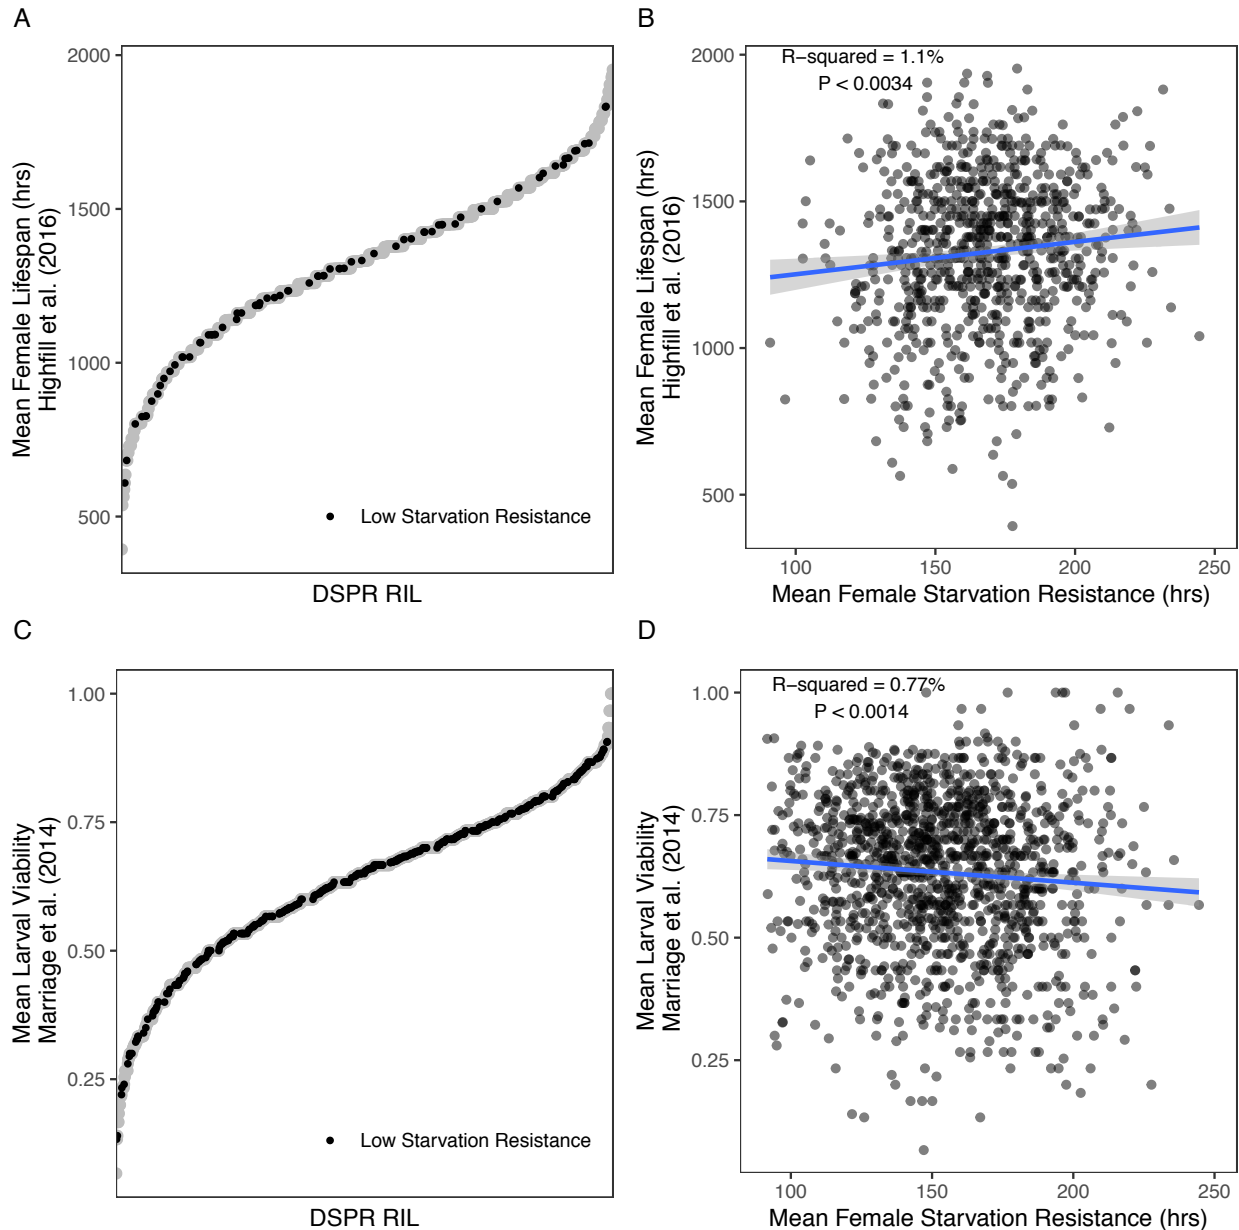

**Figure S11.** DSPR RILs with low starvation resistance ranged from low to high for other measures of fitness. A. Distribution of mean female lifespan in DSPR pB RILs (Highfill et al. (2016)). RILs with low female starvation resistance (in the bottom 25% of the distribution) are shown in solid black symbols, while other RILs are shown in gray. B. The correlation between mean female starvation resistance and mean female lifespan is minimal, suggesting there is no association between low starvation resistance and reduced lifespan. C. Distribution of mean larval viability measured as the proportion of 1<sup>st</sup> instar larvae reared under control conditions that emerged as adults (Marriage et al. (2014)). RILs with low female starvation resistance (in the bottom 25% of the distribution) are shown in solid black symbols, while other RILs are shown in gray. D. The weak correlation between mean female starvation resistance and mean larval viability again suggests that there is no association between low starvation resistance and low larval viability. We also fail to find strong associations between starvation resistance and other measures of fitness in the DGRP (Fig S12).

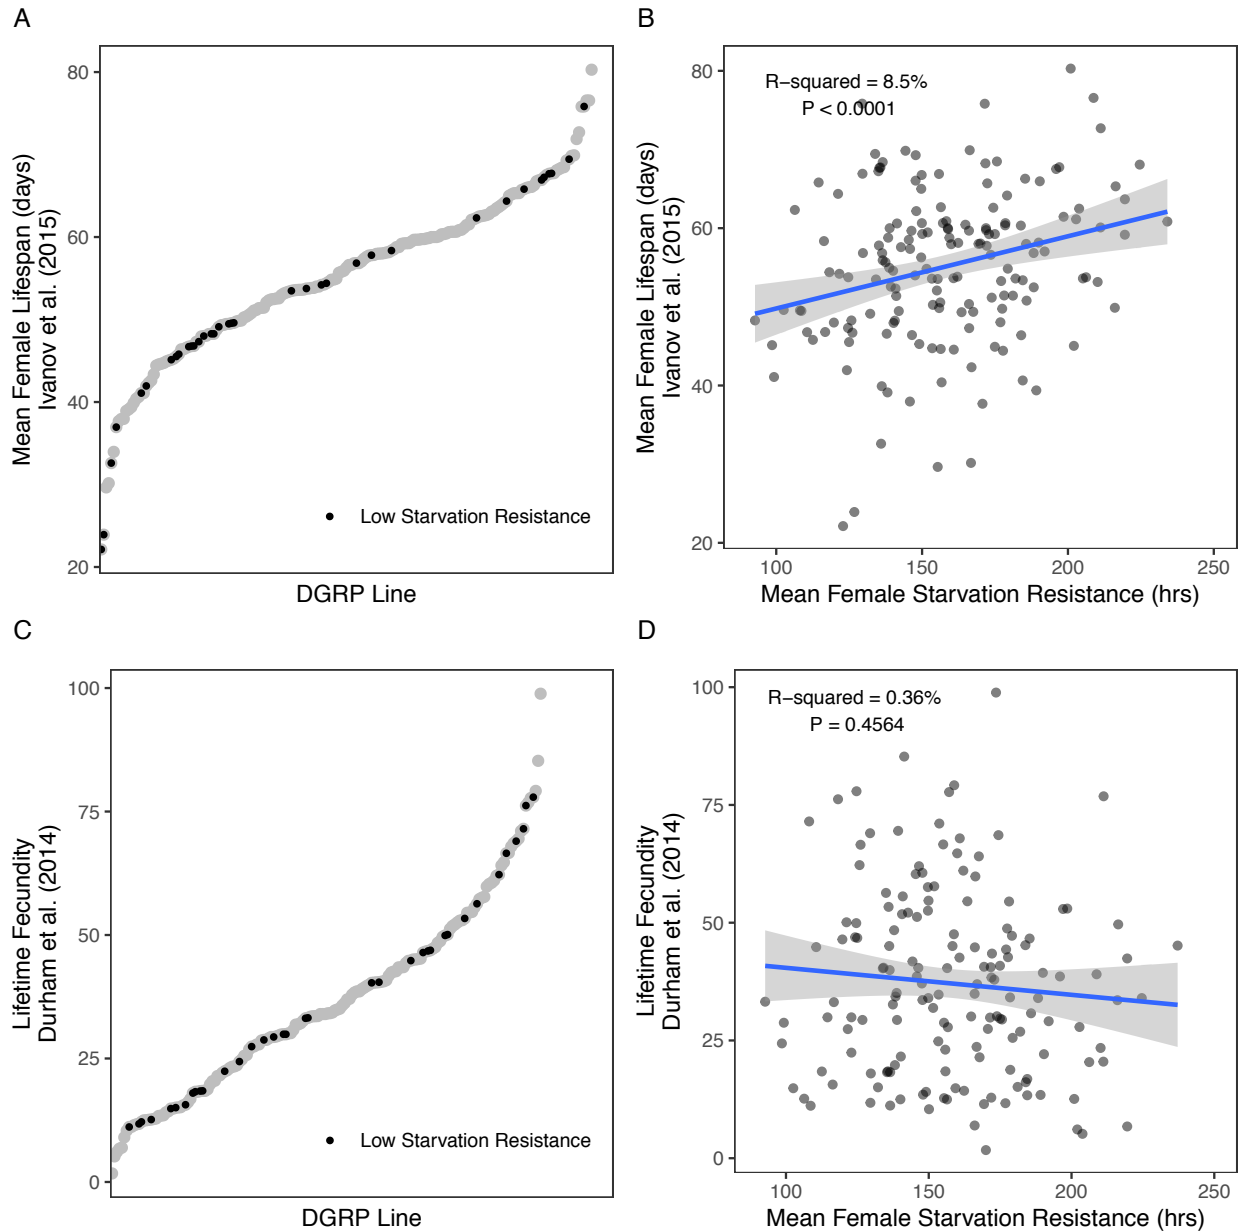

**Figure S12.** DGRP Lines with low starvation resistance ranged from low to high for other measures of fitness. A. Distribution of mean female lifespan in the DGRP (Ivanov et al. (2015)). Lines with low female starvation resistance (in the bottom 25% of the distribution) are shown in solid black symbols, while other lines are shown in gray. B. The correlation between mean female starvation resistance and mean female lifespan is minimal, suggesting there is little association between low starvation resistance and reduced lifespan. C. Distribution of lifetime fecundity (Durham et al. (2014)). Lines with low female starvation resistance (in the bottom 25% of the distribution) are shown in solid black symbols, while other lines are shown in gray. D. The weak correlation between mean female starvation resistance and fecundity suggests that there is no association between low starvation resistance and this measure of fitness.

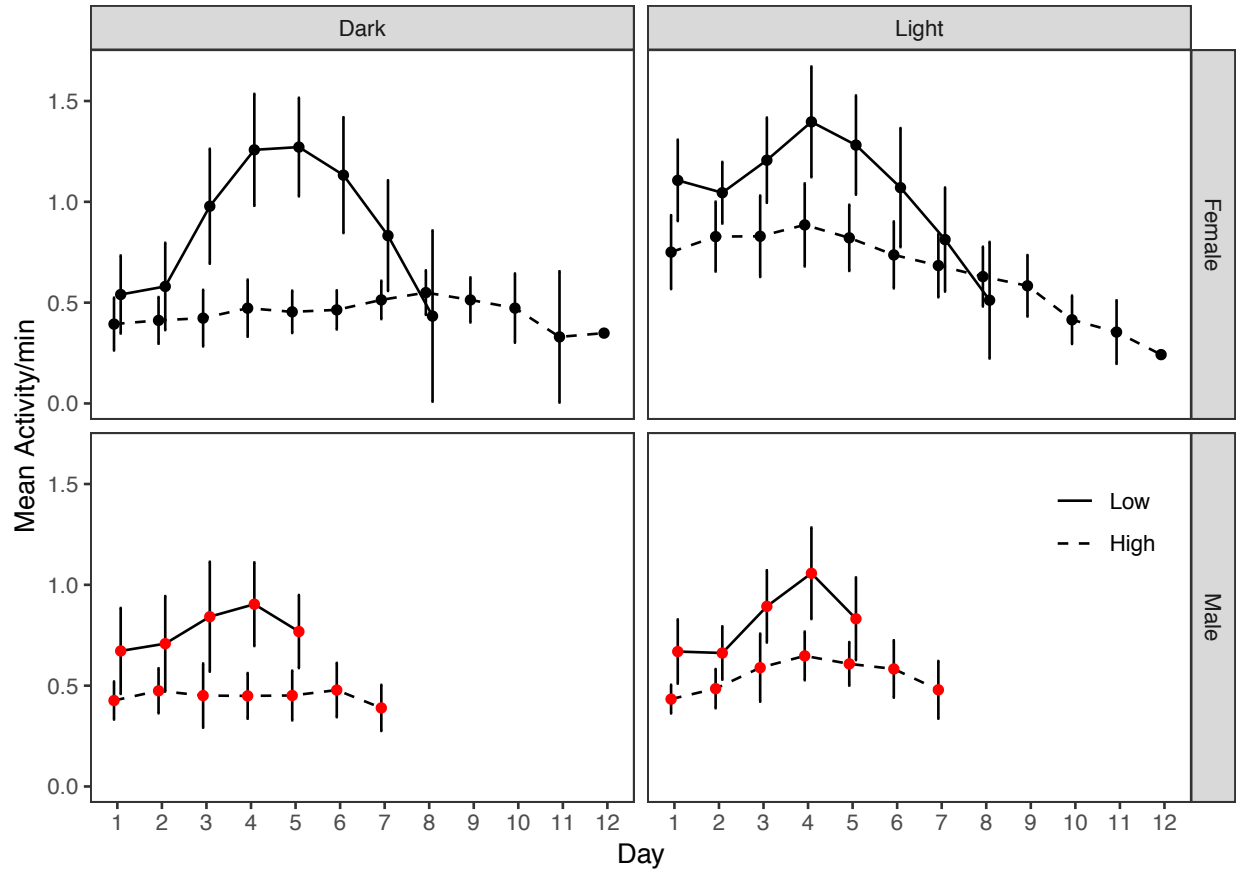

**Figure S13.** Mean activity levels for females (top panel, black points) and males (bottom panel, red points) ( $\pm 95\%$  CI) across the 12-hr daily light or dark periods during starvation in the DAM (Drosophila Activity Monitor) assay until death. Low starvation resistance RILs (solid line) tended to be more active during starvation compared to high starvation resistance RILs (dashed line) under both light and dark conditions. Light status (dark versus light) influenced the overall activity level of females but did not influence male activity. Data were analyzed with a repeated measures ANOVA; results are presented in Table S8. Similar to the pre-starvation period (Fig 4), waking activity levels of individuals during the DAM starvation experiment were primarily driven by starvation resistance rank in both sexes (females:  $F_{1,8} = 14.87$ ,  $p < 0.01$ ; males:  $F_{1,6} = 13.87$ ,  $p < 0.01$ ; Table S8). Light status did not influence activity between days for either sex (females:  $F_{1,8} = 0.84$ ,  $p = 0.39$ ; males:  $F_{1,6} = 0.23$ ,  $p = 0.65$ ; Table S8). However, light status did significantly influence activity in females within each day (females:  $F_{1,8} = 43.09$ ,  $p < 0.0001$ ; Table S8), indicating that female activity in both high and low starvation resistance RILs was consistently higher during times when lights were on. Male activity of high and low starvation resistance RILs tended to remain constant under different light conditions. The larger influence of light status on females is consistent with patterns observed in activity during the pre-starvation period (Fig 4).



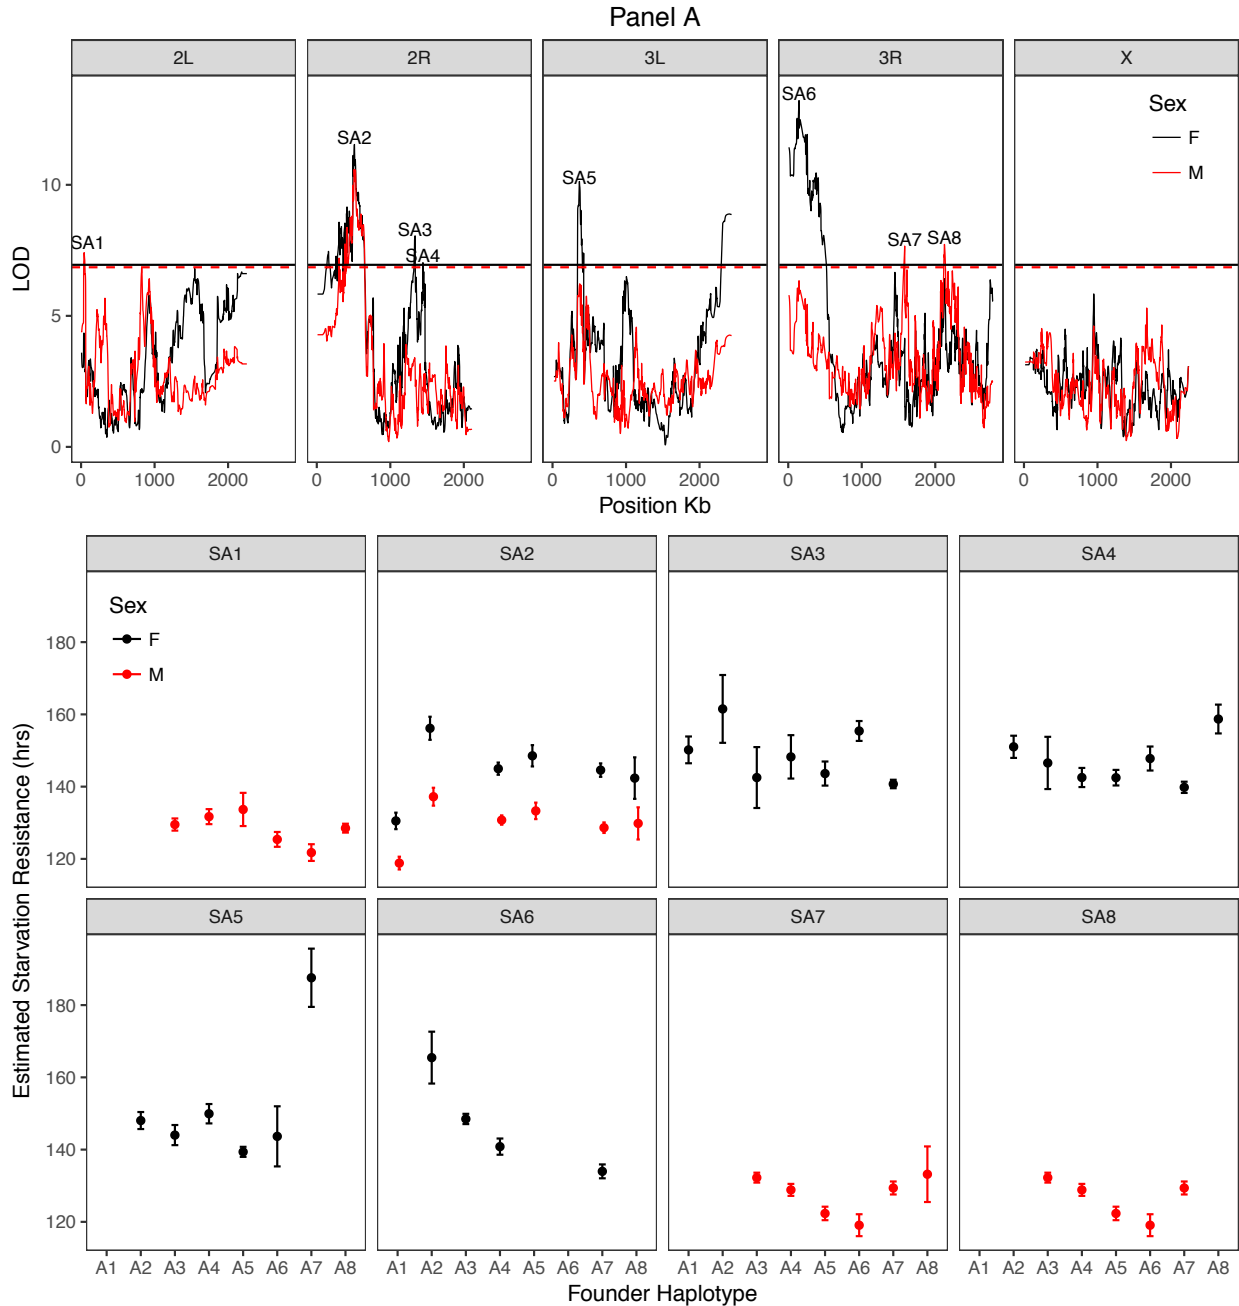

**Figure S14.** Starvation resistance QTL and estimated allele effects at each QTL. Data are presented as RIL means ( $\pm$ SE) for estimated starvation resistance when the founder haplotype was present in more than 5 RILs. As has been seen in a number of studies using the DSPR and other multiparental populations (King et al. 2012b; Giraud et al. 2014; Najarro et al. 2015), the estimated phenotypic effects of each founder haplotype suggest that multiple alleles may be present at our starvation QTL, since the effects do not fall into two clear "high" and "low" classes.

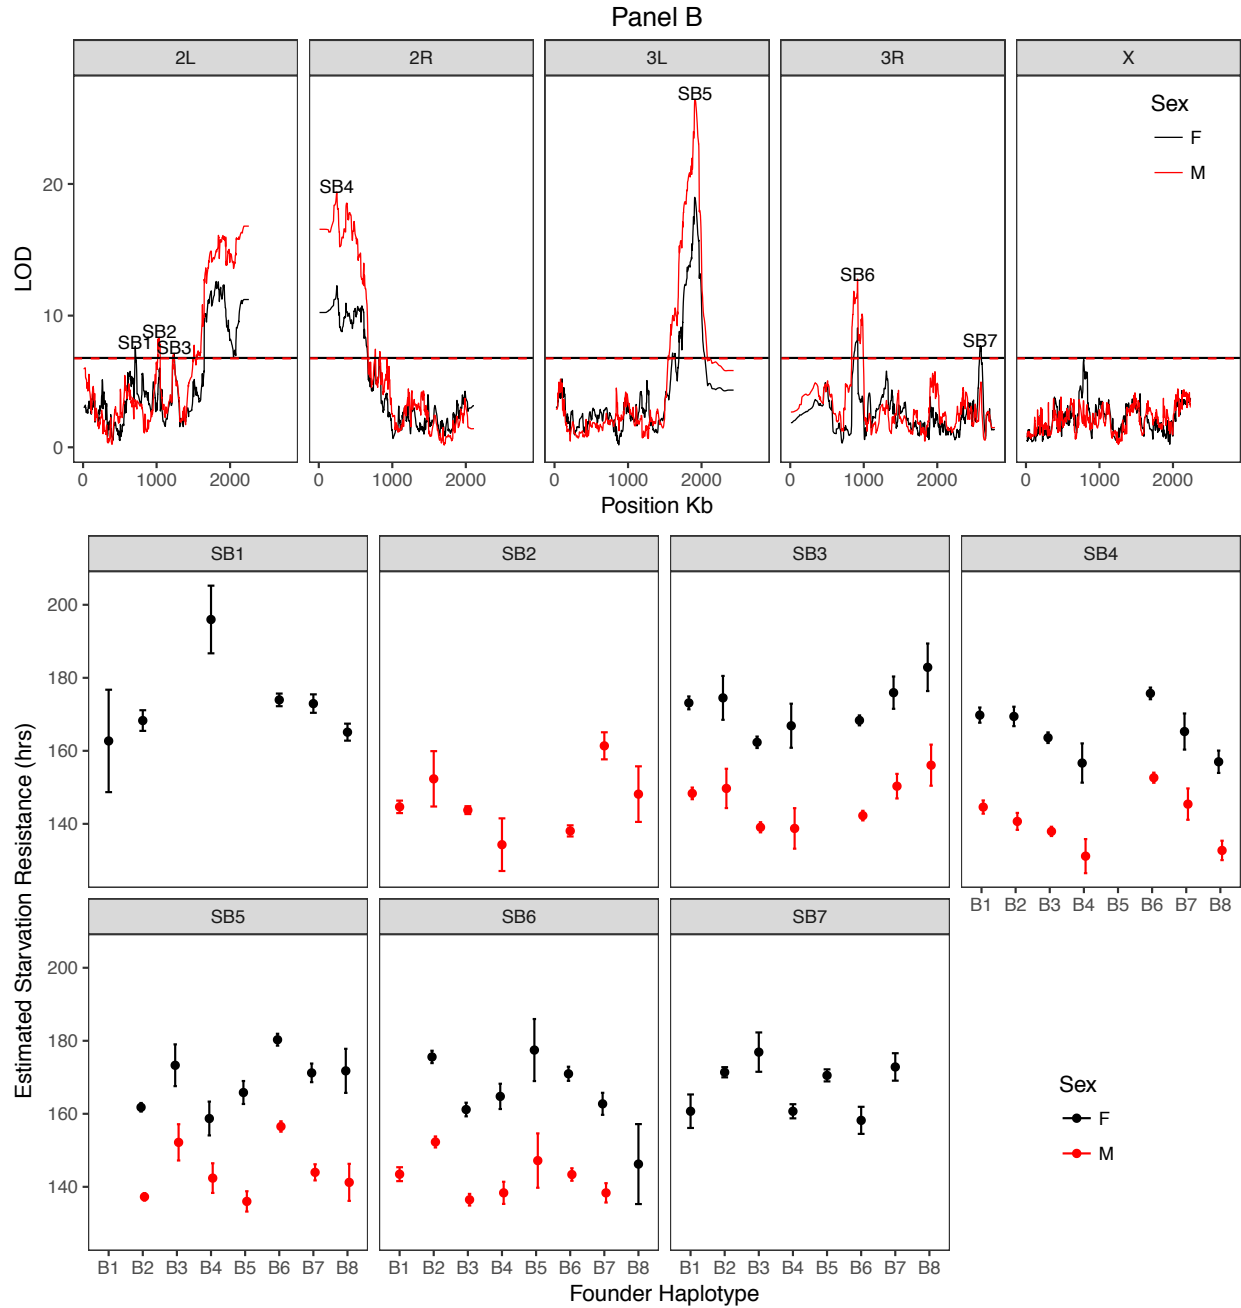

**Figure S14 continued.**

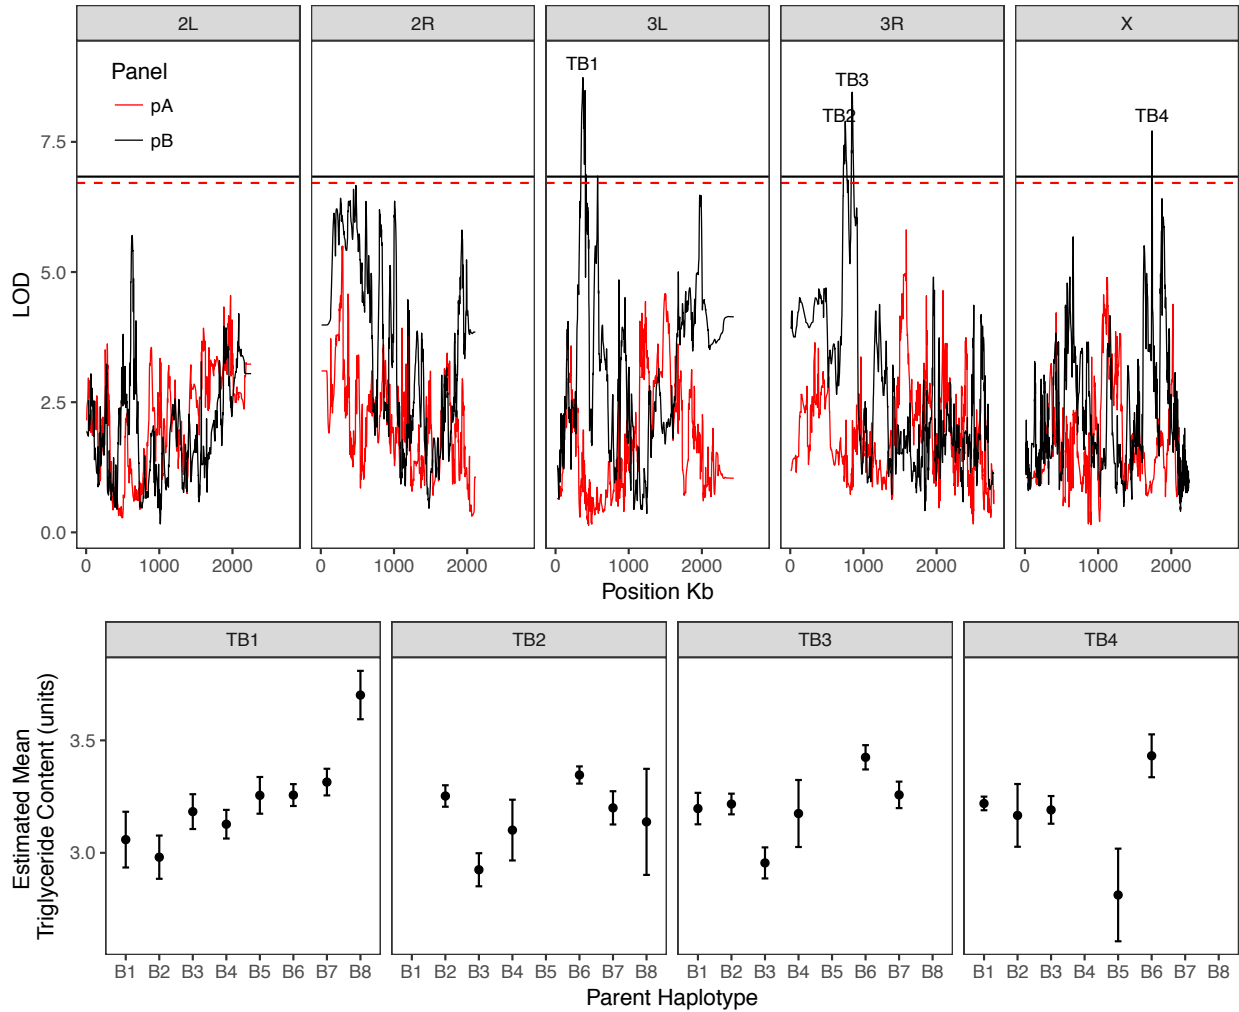

**Figure S15.** Triglyceride level QTL and estimated allele effects of founders at each QTL. Data are presented as RIL means ( $\pm$ SE) for estimated triglyceride level when the founder haplotype was present in more than 5 RILs. Similar to starvation resistance, the estimated phenotypic effects of each founder haplotype suggest that multiple alleles may be present at our triglyceride QTL.

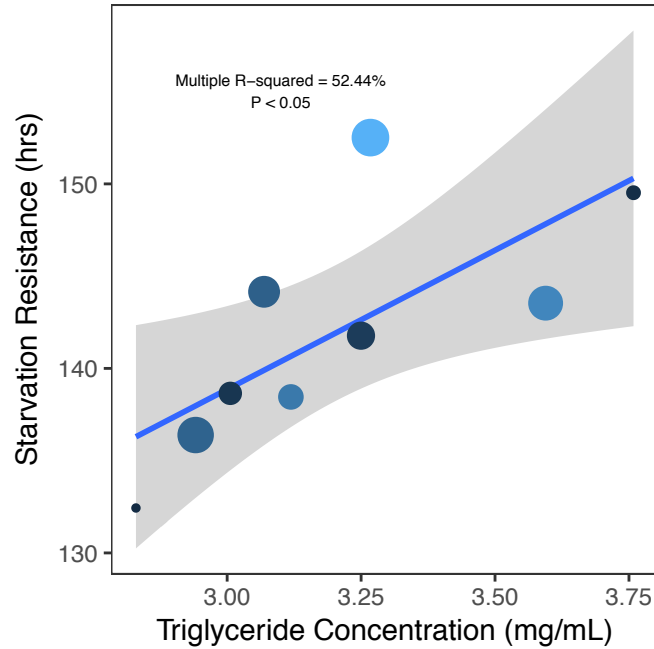

**Figure S16.** Triglyceride level and starvation resistance were correlated after accounting for variation due to founder haplotype at the overlapping peaks TB3 and SB6 ( $F_{1,7} = 7.72$ ,  $P < 0.05$ ). Data presented are averages for each founder haplotype in the pB panel, including “NA” for RILs that could not be assigned with confidence to a known haplotype. Point size relates the number of RILs per haplotype for the starvation resistance peak (smallest = 1 RIL; largest = 193 RILs); point color relates the number of RILs per haplotype for the triglyceride level peak (black = 1 RIL; lightest blue = 181 RILs). Grey shading around the regression line indicates the 95% confidence interval.

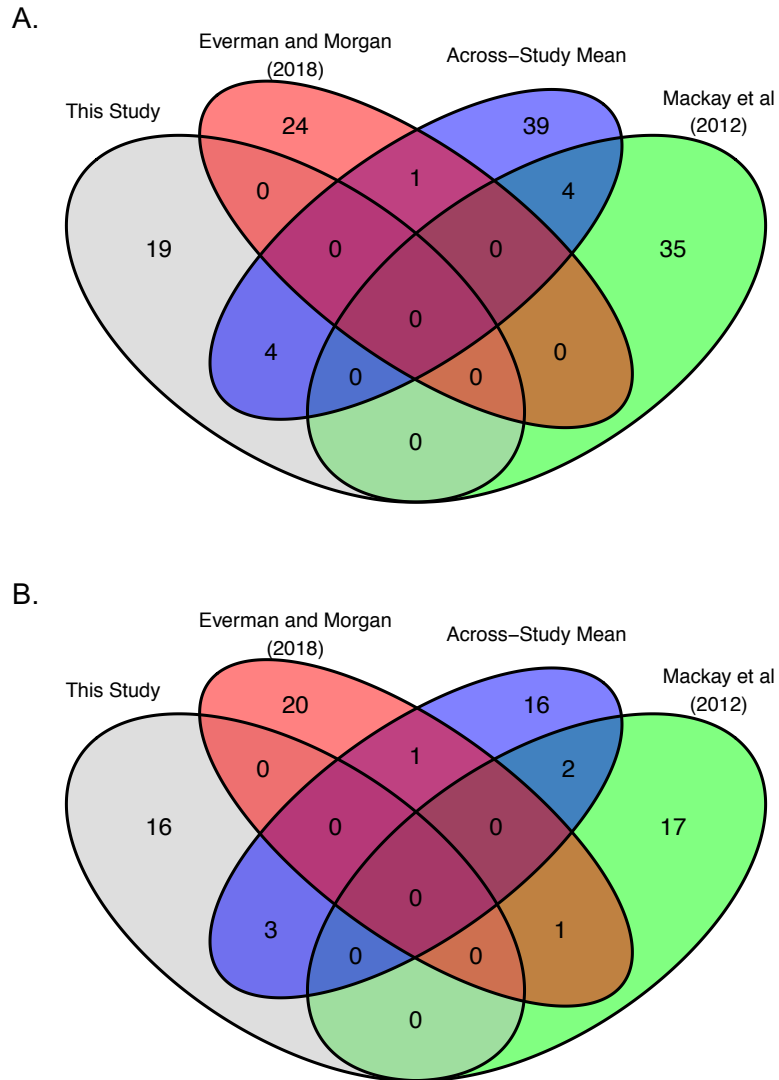

**Figure S17.** *Overlap in SNPs associated with starvation resistance for each DGRP dataset using the  $P < 10^{-5}$  significance threshold. Overlap between data sets was minimal. Plot A presents results for females; plot B presents results for males.*

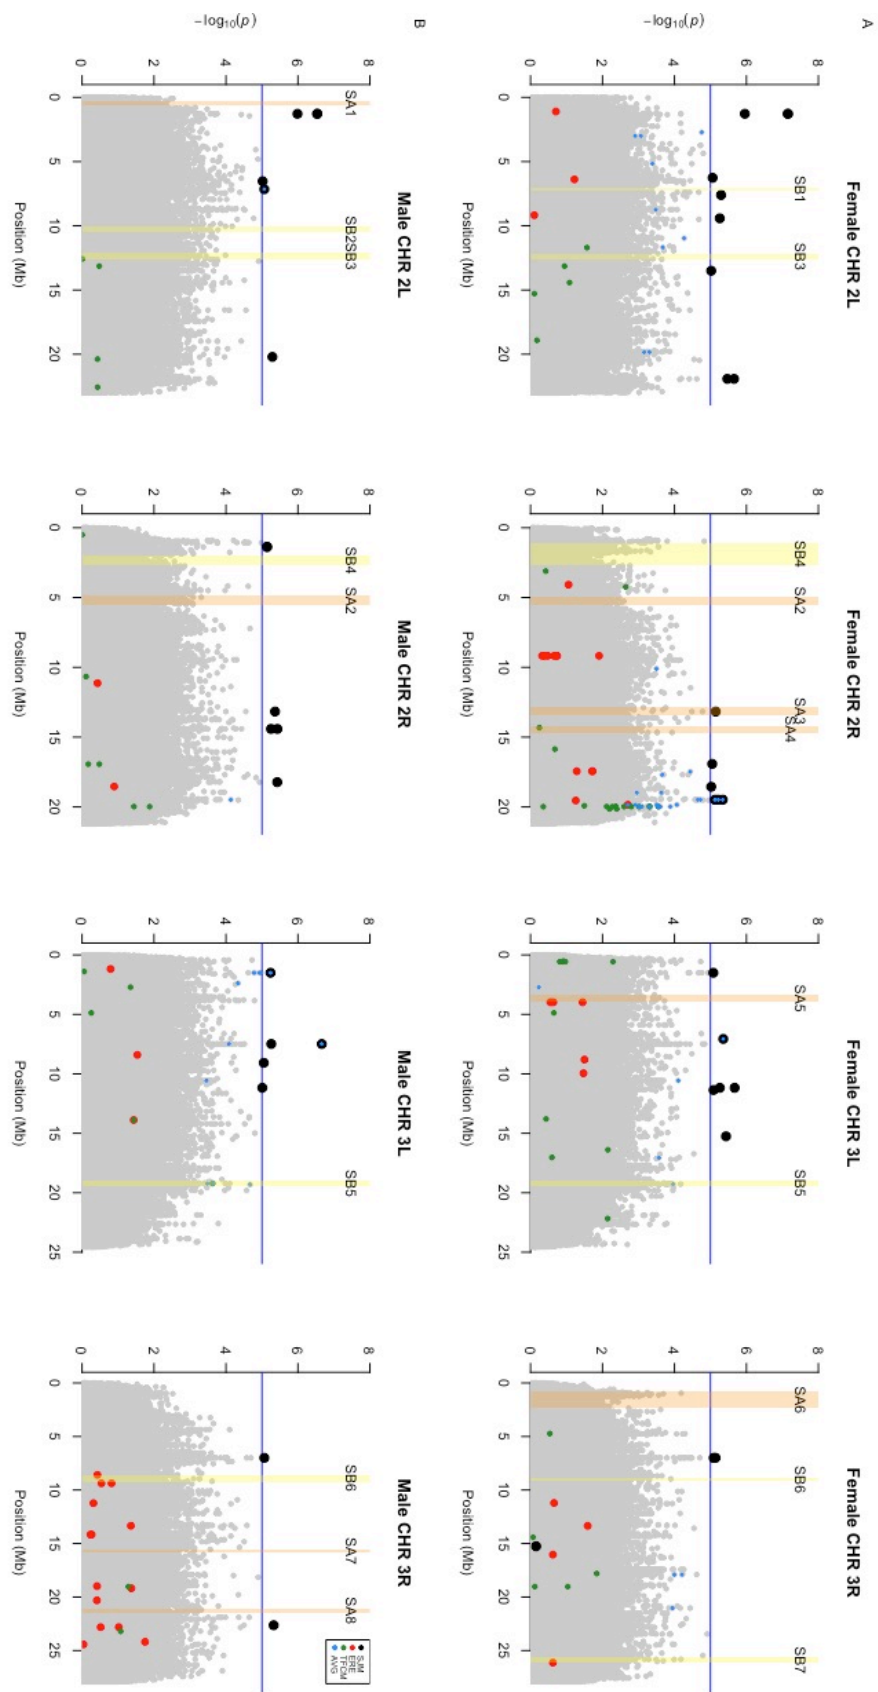

**Figure S18.** *Manhattan plots of mean starvation resistance in the DGRP with SNPs that were associated with starvation resistance in previous studies and intervals of sex-specific QTL identified for starvation resistance in the DSPR highlighted. Plots are broken up by chromosome arm in A for females and in B for males. In all plots, points highlighted in black indicate SNPs that are associated with starvation resistance in the DGRP from data obtained in this study; red points indicate SNPs associated with starvation resistance in Everman and Morgan 2018; green points indicate SNPs associated with starvation resistance in Mackay et al. 2012; blue points indicate SNPs associated with starvation resistance averaged across the three datasets. A genomewide significance threshold of  $P < 10^{-5}$  is shown with the blue line. Yellow shaded boxes and labels correspond to QTL intervals around peaks mapped in the pB DSPR panel; orange shaded boxes correspond to QTL intervals around peaks mapped in the pA DSPR panel.*

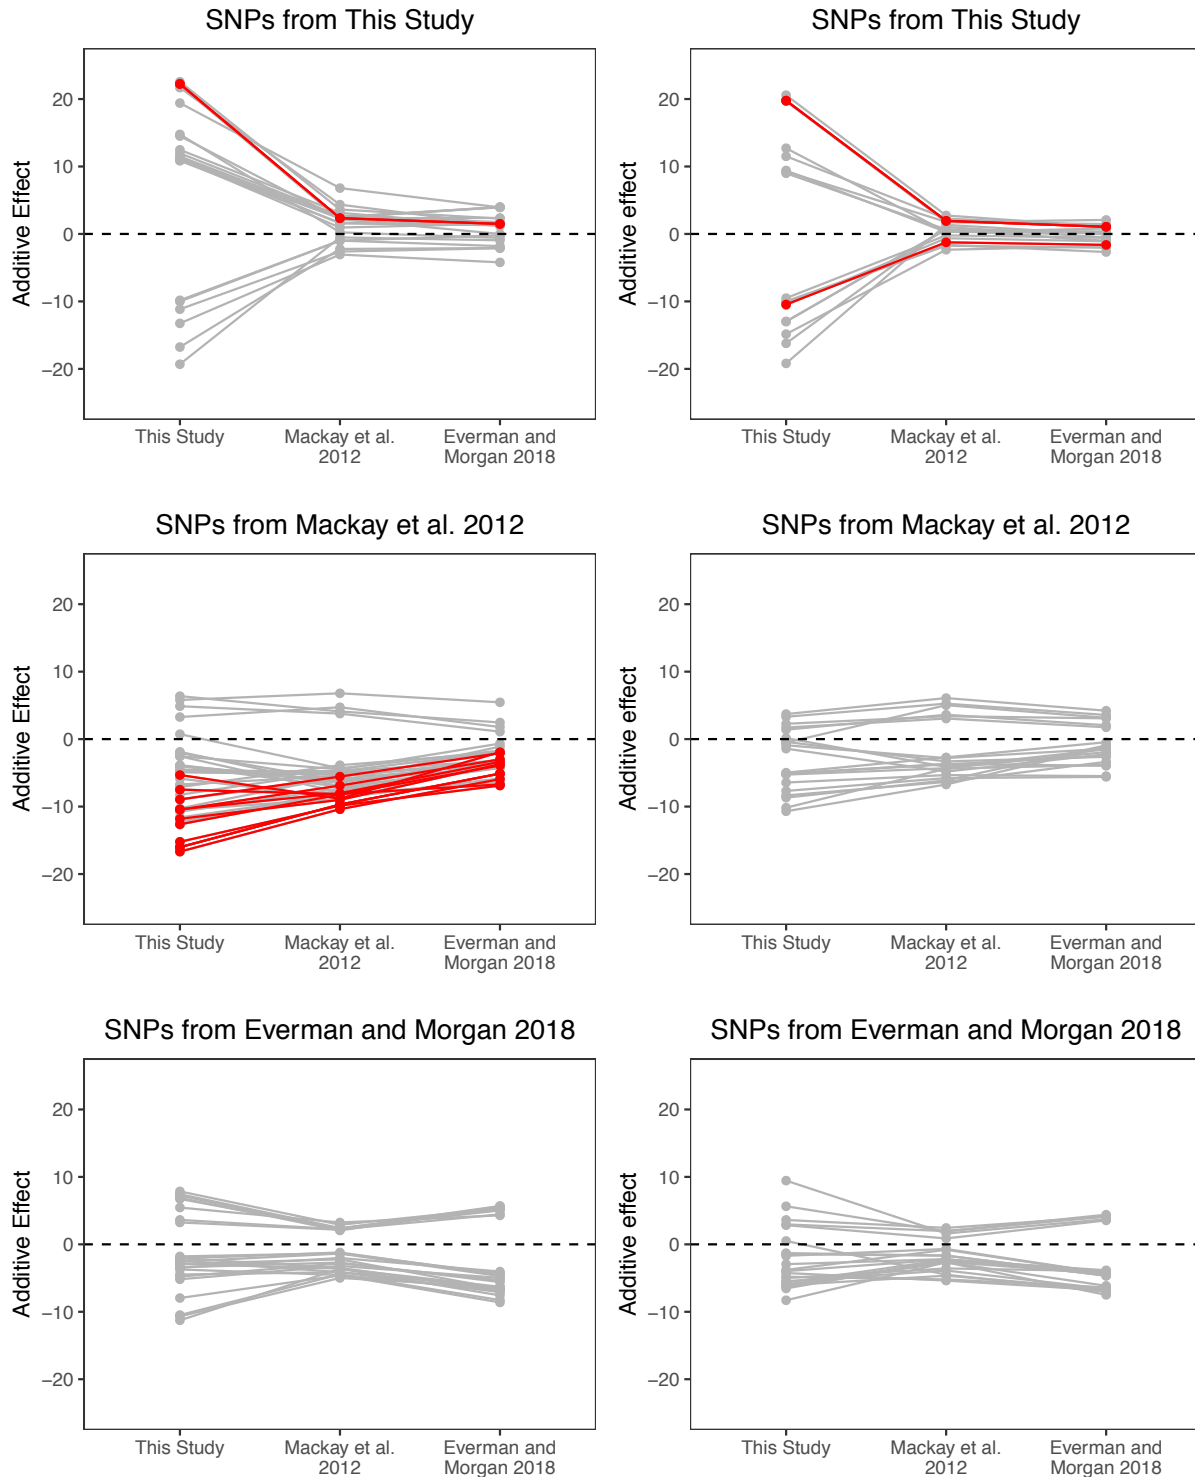

**Figure S18.** Additive effects of SNPs associated with starvation resistance (at  $P < 10^{-5}$ ) in each study, along with their additive effects estimated in the other two studies. Female data is presented in the left column of plots; male data is presented in the right column of plots. SNPs that passed the FDR threshold of 0.2 are highlighted in red. Generally, SNPs had similar effects (of the same +/- sign) on starvation resistance in all three experiments.



## Supplemental Tables

**Table S1. Analysis of variance of the effect of DSPR rearing density on starvation resistance.**

| <b>Source</b>      | <b>df</b> | <b>SS</b> | <b>MS</b> | <b>F</b> | <b>P</b>  | <b>% Var. Exp.</b> |
|--------------------|-----------|-----------|-----------|----------|-----------|--------------------|
| Density            | 1         | 1758.00   | 1758.20   | 18.15    | < 0.0001  | 0.90               |
| DSPR RIL           | 19        | 148747    | 7828.80   | 80.83    | << 0.0001 | 80.2               |
| Density x DSPR RIL | 19        | 8905      | 468.70    | 4.84     | < 0.0001  | 4.80               |
| Residual           | 269       | 26054     | 96.90     |          |           |                    |

**Table S2. Analysis of variance of mean starvation resistance in the DSPR.**

| <b>Source</b>              | <b>df</b> | <b>SS</b> | <b>MS</b> | <b>F</b> | <b>P</b> |
|----------------------------|-----------|-----------|-----------|----------|----------|
| Subpopulation <sup>a</sup> | 3         | 330782    | 110261    | 183.702  | < 0.0001 |
| Sex                        | 1         | 342197    | 342197    | 570.121  | < 0.0001 |
| Subpopulation x Sex        | 3         | 32982     | 10994     | 18.317   | < 0.0001 |
| Residual                   | 3440      | 2064747   | 600       |          |          |

<sup>a</sup> We note that since most RILs from a given subpopulation were tested in the same batch, batch effects may contribute to some of the subpopulation-to-subpopulation differences we report.

**Table S3. Analysis of variance of mean triglyceride level in the DSPR.**

| <b>Source</b> | <b>df</b> | <b>SS</b> | <b>MS</b> | <b>F</b> | <b>P</b> |
|---------------|-----------|-----------|-----------|----------|----------|
| Subpopulation | 3         | 46.81     | 15.6020   | 37.099   | < 0.0001 |
| Residual      | 935       | 393.22    | 0.4206    |          |          |

**Table S4. Stratification of the top 50 SNPs associated with starvation resistance in the DGRP across five frequency bins.**

| Study                     | Sex | Allele Frequency Bin | No. SNPs |
|---------------------------|-----|----------------------|----------|
| This Study                | F   | 0.05 - 0.1           | 14       |
| This Study                | F   | > 0.1 - 0.2          | 9        |
| This Study                | F   | > 0.2 - 0.3          | 13       |
| This Study                | F   | > 0.3 - 0.4          | 6        |
| This Study                | F   | > 0.4 - 0.5          | 8        |
| This Study                | M   | 0.05 - 0.1           | 11       |
| This Study                | M   | > 0.1 - 0.2          | 12       |
| This Study                | M   | > 0.2 - 0.3          | 13       |
| This Study                | M   | > 0.3 - 0.4          | 3        |
| This Study                | M   | > 0.4 - 0.5          | 11       |
| Mackay <i>et al.</i> 2012 | F   | 0.05 - 0.1           | 28       |
| Mackay <i>et al.</i> 2012 | F   | > 0.1 - 0.2          | 11       |
| Mackay <i>et al.</i> 2012 | F   | > 0.2 - 0.3          | 5        |
| Mackay <i>et al.</i> 2012 | F   | > 0.3 - 0.4          | 2        |
| Mackay <i>et al.</i> 2012 | F   | > 0.4 - 0.5          | 4        |
| Mackay <i>et al.</i> 2012 | M   | 0.05 - 0.1           | 21       |
| Mackay <i>et al.</i> 2012 | M   | > 0.1 - 0.2          | 13       |
| Mackay <i>et al.</i> 2012 | M   | > 0.2 - 0.3          | 7        |
| Mackay <i>et al.</i> 2012 | M   | > 0.3 - 0.4          | 2        |
| Mackay <i>et al.</i> 2012 | M   | > 0.4 - 0.5          | 7        |
| Everman and Morgan 2018   | F   | 0.05 - 0.1           | 11       |
| Everman and Morgan 2018   | F   | > 0.1 - 0.2          | 13       |
| Everman and Morgan 2018   | F   | > 0.2 - 0.3          | 10       |
| Everman and Morgan 2018   | F   | > 0.3 - 0.4          | 8        |
| Everman and Morgan 2018   | F   | > 0.4 - 0.5          | 8        |
| Everman and Morgan 2018   | M   | 0.05 - 0.1           | 18       |
| Everman and Morgan 2018   | M   | > 0.1 - 0.2          | 13       |
| Everman and Morgan 2018   | M   | > 0.2 - 0.3          | 12       |
| Everman and Morgan 2018   | M   | > 0.3 - 0.4          | 4        |
| Everman and Morgan 2018   | M   | > 0.4 - 0.5          | 3        |

**Table S5. Analysis of variance of mean starvation resistance in the DGRP.**

| <b>Source</b> | <b>df</b> | <b>SS</b> | <b>MS</b> | <b>F</b> | <b>P</b> |
|---------------|-----------|-----------|-----------|----------|----------|
| Sex           | 1         | 97213     | 97213     | 118.21   | < 0.0001 |
| Residual      | 334       | 274680    | 822       |          |          |

**Table S6. Analysis of variance of the effect of preservatives and environment on starvation resistance in the DGRP.**

| <b>Source</b>                           | <b>df</b> | <b>SS</b> | <b>MS</b> | <b>F value</b> | <b>P</b> | <b>% Var. Exp.</b> |
|-----------------------------------------|-----------|-----------|-----------|----------------|----------|--------------------|
| Environment                             | 1         | 2400      | 2400      | 16.71          | < 0.0001 | 0.30               |
| Preservatives                           | 1         | 604184    | 604184    | 4205.70        | < 0.0001 | 81.17              |
| DGRP Line                               | 11        | 63653     | 5787      | 40.28          | < 0.0001 | 8.55               |
| Environment x Preservatives             | 1         | 155       | 155       | 1.08           | 0.30     | 0.02               |
| Environment x DGRP Line                 | 11        | 7289      | 663       | 4.61           | < 0.0001 | 0.98               |
| Preservatives x DGRP Line               | 11        | 14718     | 1338      | 9.31           | < 0.0001 | 1.98               |
| Environment x Preservatives x DGRP Line | 11        | 4961      | 451       | 3.14           | < 0.001  | 0.67               |
| Residual                                | 327       | 46976     | 144       |                |          |                    |

**Table S7. Analysis of variance of activity during the 24-hour period prior to the DAM (*Drosophila* Activity Monitor) starvation assay.**

| Source                                           | df  | SS    | MS   | F value | P        | Effect Size |
|--------------------------------------------------|-----|-------|------|---------|----------|-------------|
| Starvation Resistance Rank (High vs. Low)        | 1   | 1.37  | 1.37 | 12.48   | < 0.001  | 0.31        |
| Sex                                              | 1   | 0.61  | 0.61 | 5.57    | < 0.05   | 0.21        |
| Lights On/Off                                    | 1   | 1.55  | 1.55 | 14.11   | < 0.001  | 0.33        |
| Starvation Resistance Rank x Sex                 | 1   | 0.00  | 0.00 | 0.01    | 0.92     | 0.01        |
| Starvation Resistance Rank x Lights On/Off       | 1   | 0.00  | 0.00 | 0.00    | 0.98     | 0.00        |
| Sex x Lights On/Off                              | 1   | 1.85  | 1.85 | 16.87   | < 0.0001 | 0.36        |
| Starvation Resistance Rank x Sex x Lights On/Off | 1   | 0.02  | 0.02 | 0.21    | 0.64     | 0.04        |
| Residuals                                        | 132 | 14.49 | 0.11 | 0.00    |          |             |

**Table S8. Repeated measures analysis of variance across days for activity during the DAM (*Drosophila* Activity Monitor) starvation assay for males and females.**

**Female Activity During Starvation  
Between Days**

| Source                                                    | df | SS    | MS    | F value | P      |
|-----------------------------------------------------------|----|-------|-------|---------|--------|
| Starvation Resistance Rank (High vs. Low)                 | 1  | 11.15 | 11.15 | 14.19   | < 0.01 |
| Lights On/Off                                             | 1  | 0.66  | 0.66  | 0.84    | 0.39   |
| Starvation Resistance Rank (High vs. Low) x Lights On/Off | 1  | 0.48  | 0.48  | 0.61    | 0.46   |
| Residuals                                                 | 8  | 6.29  | 0.79  |         |        |

**Within Day**

| Source                                                    | df  | SS    | MS    | F value | P        |
|-----------------------------------------------------------|-----|-------|-------|---------|----------|
| Starvation Resistance Rank (High vs. Low)                 | 1   | 19.06 | 19.06 | 115.58  | < 0.0001 |
| Lights On/Off                                             | 1   | 7.10  | 7.11  | 43.09   | < 0.0001 |
| Starvation Resistance Rank (High vs. Low) x Lights On/Off | 1   | 0.16  | 0.16  | 0.99    | 0.32     |
| Residuals                                                 | 575 | 94.81 | 0.17  |         |          |

**Male Activity During Starvation  
Between Days**

| Source                                                    | df | SS   | MS   | F value | P      |
|-----------------------------------------------------------|----|------|------|---------|--------|
| Starvation Resistance Rank (High vs. Low)                 | 1  | 5.47 | 5.47 | 13.79   | < 0.01 |
| Lights On/Off                                             | 1  | 0.09 | 0.09 | 0.23    | 0.65   |
| Starvation Resistance Rank (High vs. Low) x Lights On/Off | 1  | 0.67 | 0.67 | 1.69    | 0.24   |
| Residuals                                                 | 6  | 2.38 | 0.40 |         |        |

**Within Day**

| Source                                                    | df  | SS    | MS   | F value | P        |
|-----------------------------------------------------------|-----|-------|------|---------|----------|
| Starvation Resistance Rank (High vs. Low)                 | 1   | 5.03  | 5.04 | 46.70   | < 0.0001 |
| Lights On/Off                                             | 1   | 0.32  | 0.32 | 2.93    | 0.09     |
| Starvation Resistance Rank (High vs. Low) x Lights On/Off | 1   | 0.12  | 0.12 | 1.14    | 0.29     |
| Residuals                                                 | 471 | 50.78 | 0.11 |         |          |



***Table S9. Data from genes mapped to the region under QTL intervals for starvation resistance in the pA and pB DSPR mapping panels and triglyceride level in the pB DSPR mapping panel based on Flybase release version FB2018\_1. Highlighted genes indicate those previously identified in QTL mapping studies of starvation resistance.***

**Table S10. Gene ontology analysis of genes that are included within QTL intervals for starvation resistance and triglyceride level.**

| <b>Starvation Resistance GO Analysis: pA DSPR Panel</b>     |                        |            |
|-------------------------------------------------------------|------------------------|------------|
| <b>Category</b>                                             | <b>Fold Enrichment</b> | <b>FDR</b> |
| glutathione metabolic process (GO:0006749)                  | 6.91                   | 1.46E-04   |
| cellular modified amino acid metabolic process (GO:0006575) | 3.85                   | 1.79E-02   |

| <b>Triglyceride Level GO Analysis: pB DSPR Panel</b>                                |                        |            |
|-------------------------------------------------------------------------------------|------------------------|------------|
| <b>Category</b>                                                                     | <b>Fold Enrichment</b> | <b>FDR</b> |
| heat shock-mediated polytene chromosome puffing (GO:0035080)                        | 42.66                  | 4.25E-04   |
| polytene chromosome puffing (GO:0035079)                                            | 38.39                  | 3.35E-04   |
| sensory perception of sweet taste (GO:0050916)                                      | 27.42                  | 7.71E-04   |
| detection of chemical stimulus involved in sensory perception of taste (GO:0050912) | 19.47                  | 7.16E-04   |
| chaperone cofactor-dependent protein refolding (GO:0051085)                         | 16                     | 5.94E-03   |
| 'de novo' posttranslational protein folding (GO:0051084)                            | 16                     | 5.19E-03   |
| protein refolding (GO:0042026)                                                      | 15.36                  | 5.65E-03   |
| 'de novo' protein folding (GO:0006458)                                              | 13.24                  | 9.68E-03   |
| cellular response to unfolded protein (GO:0034620)                                  | 12.8                   | 4.87E-03   |
| response to unfolded protein (GO:0006986)                                           | 12.44                  | 4.78E-03   |
| cellular response to topologically incorrect protein (GO:0035967)                   | 9.95                   | 1.06E-02   |
| response to topologically incorrect protein (GO:0035966)                            | 9.74                   | 1.00E-02   |
| cellular response to heat (GO:0034605)                                              | 8.93                   | 5.11E-02   |
| chaperone-mediated protein folding (GO:0061077)                                     | 8.93                   | 4.79E-02   |
| response to hypoxia (GO:0001666)                                                    | 7.22                   | 4.89E-02   |
| sensory perception of taste (GO:0050909)                                            | 6.65                   | 2.84E-02   |

Gene lists used in each analysis included all genes unique to male and female analyses for each trait. GO analysis was performed using the PANTHER Overrepresentation Analysis (Released 2018-05-21) with Fisher's Exact test with FDR multiple test correction. We found no GO enrichment among the genes implicated by QTL mapped for starvation resistance in the pB panel or genes associated with SNPs implicated in the DGRP.

**Table S11. Data from GWA, generated from the DGRP Freeze 2.0 pipeline, based on Flybase release version FB2018\_1. All SNPs shown passed the  $P < 10^{-5}$  significance threshold; highlighted SNPs passed the FDR threshold of 0.2.**

## Supplemental Text

### *Text S1. Starvation media recipe.*

|         |                                                                        |
|---------|------------------------------------------------------------------------|
| 1000 ml | De-ionized water                                                       |
| 15 g    | Agar                                                                   |
| 12 ml   | Propionic/Phosphoric acid mix*                                         |
| 2 g     | Tegosept (Genesee Scientific, Cat: 20-258) dissolved in 20 ml 95% EtOH |

#### \* Acid mix:

|        |                         |
|--------|-------------------------|
| 330 ml | De-ionized water        |
| 259 ml | Propionic acid          |
| 31 ml  | o-Phosphoric acid (85%) |

Bring agar in water to a boil, reduce heat and simmer for 20 minutes. Remove from heat, stir in acid mix and tegosept. Cool slightly before pouring vials.

## Supplemental Files

File S1. All code associated with the bootstrapping analysis of SNPs associated with starvation resistance measured in the DGRP in this study, Mackay *et al.* (2012), and Everman and Morgan (2018).

**File S2.** Description of each dataset associated with this study.

##### README for Datafiles (in RawData.zip) Accompanying Everman et al. 2019

# DSPR\_Data/:

DSPR\_1.txt

Tab-separated txt file of raw DSPR Starvation and Desiccation Resistance reported in hours for each fly per experimental vial.

Data are presented in Figure 1, Figure 3, Figure 6, Figure S2, Figure S5, Figure S7, Figure S11.

Column headers:

Mapping.Panel = DSPR, Drosophila Synthetic Population Resource  
Trait = StarvationResistance or DesiccationResistance  
RIL.ID = Recombinant Inbred Line ID from the DSPR  
VialID = Unique number corresponding to each experimental vial  
Sex = (m) Male or (f) Female  
FlyID = Unique identifier for individual flies in each vial  
LifespanHrs = Lifespan in hours for each individual fly

DSPR\_2.txt

Tab-separated txt file of raw Founder Starvation Resistance reported in hours for each fly per experimental vial.

Data are presented in Figure 1.

Column headers:

Trait = StarvationResistance  
DSPR.founder = DSPR founder line ID  
Sex = (m) Male or (f) Female  
RepVial = Vial replicate number  
FlyID = Unique identifier for individual flies in each vial  
LifespanHrs = Lifespan in hours for each individual fly

DSPR\_3.txt

Tab-separated txt file of raw female DSPR Triglyceride Levels reported per well.  
Data are presented in Figure 5, Figure 6, Figure S3.

Column headers:

Mapping.Panel = DSPR, Drosophila Synthetic Population Resource  
Trait = TriglycerideLevel  
RIL.ID = Recombinant Inbred Line ID from the DSPR  
NumericPlateID = Unique number corresponding to each plate  
WellID = ID corresponding to each well of the plate  
SampleID = Unique identifier for samples  
TrueSerumTriglyConc = Triglyceride level per sample based on five females per sample

DSPR\_4.txt

Tab-separated txt file of raw DSPR Starvation Resistance reported in hours using Drosophila Activity Monitors (DAM).

Data are presented in Figure S7.

Column headers:

Mapping.Panel = DSPR, Drosophila Synthetic Population Resource  
Trait = StarvationResistance  
RIL.ID = Recombinant Inbred Line ID from the DSPR  
StarvationClass = Categorical variable (HighStarvClass or LowStarvClass) based on data from DSPR\_1.txt  
Sex = (M) Male or (F) Female  
MonitorID = Unique identifier for DAM  
MonitorTubeID = Unique identifier for each tube in each DAM  
LifespanHrs = Lifespan in hours for each fly

DSPR\_5.txt

Tab-separated txt file of DSPR Activity reported under non-stressful conditions using Drosophila Activity Monitors (DAM).

Data are presented in Figure 4.

Column headers:

Mapping.Panel = DSPR, Drosophila Synthetic Population Resource  
RIL.ID = Recombinant Inbred Line ID from the DSPR  
Trait = Activity  
Sex = (m) Male or (f) Female  
StarvationClass = Categorical variable (HighStarvClass or LowStarvClass) based on data from DSPR\_1.txt

N = Number of flies tested

ActLight.Mean = Mean activity levels under light conditions

ActLight.SD = Standard deviation for activity levels under light conditions

ActDark.Mean = Mean activity levels under dark conditions

ActDark.SD = Standard deviation for activity levels under dark conditions

#### DSPR\_6.txt

Tab-separated txt file of DSPR Activity reported under starvation conditions using Drosophila Activity Monitors (DAM).

Data are presented in Figure S13.

Column headers:

Mapping.Panel = DSPR, Drosophila Synthetic Population Resource

RIL.ID = Recombinant Inbred Line ID from the DSPR

LightStatus = (L) light or (D) dark

SamplingPeriod = Day of experiment

FemaleMeanActivity = Mean activity of females

MaleMeanActivity = Mean activity of males

#### DSPR\_7.txt

Tab-separated txt file of DSPR Average Starvation Resistance reported in hours under different rearing density treatments.

Data are presented in Figure S1.

Column headers:

Mapping.Panel = DSPR, Drosophila Synthetic Population Resource

Trait = StarvationResistance

RIL.ID = Recombinant Inbred Line ID from the DSPR

Treatment = Density (60 eggs placed into rearing vials) or Population (females laid eggs for 1-2 days with visual assessment of density)

TotalAdults = Total number of flies that emerged from each vial

VialID = Unique identifier for each experimental vial

N = Number of flies per experimental vial

LifespanHrs = Average lifespan in hours for each experimental vial

#### DSPR\_8.txt

Tab-separated txt file of DSPR % survival on starvation media under different rearing density treatments.

Data are presented in Figure S1.

Column headers:

Mapping.Panel = DSPR, Drosophila Synthetic Population Resource  
Trait = StarvationResistance  
RIL.ID = Recombinant Inbred Line ID from the DSPR  
Treatment = Density (60 eggs placed into rearing vials) or Population (females laid eggs for 1-2 days with visual assessment of density)  
TotalAdults = Total number of flies that emerged from each vial  
VialID = Unique identifier for each experimental vial  
ScreenpointHrs = Hour intervals at which flies in each vial were counted  
Survival% = Percent of flies in each vial that were alive at each screenpoint

DSPR\_9.txt

Tab-separated txt file of DSPR LOD score from QTL mapping analysis.

Data are presented in Figure S14 and Figure S15.

Column headers:

DSPR.Panel = pA or pB mapping panel from the DSPR  
Trait = StarvationResistance or TriglycerideLevels  
sex = (m) Male or (f) Female  
chr = Chromosome (X, 2L, 2R, 3L, 3R)  
Ppos = Position on chromosome based on assembly 5.0  
Gpos = Genetic position  
LOD = LOD score from QTL mapping analysis

DSPR\_10.txt

Tab-separated txt file of DSPR observed and estimated starvation resistance.

Data are presented in Figure 7.

Column headers:

DSPR.founder = pA or pB mapping panel from the DSPR  
ObservedStarvationResistance = Mean observed starvation resistance of each founder line  
EstimatedStarvationResistance = Weighted estimated mean starvation resistance of each founder line determined from QTL analysis



## DSPR\_11.txt

Tab-separated txt file of DSPR starvation resistance and triglyceride level after accounting for variation due to haplotype at overlapping peaks.

Data are presented in Figure S16.

Column headers:

FounderHaplotype = Predicted haplotype at overlapping QTL

StarvationResistance = Mean starvation resistance

TriglycerideLevel = Mean triglyceride level

N\_Starv = Number of RILs with the corresponding predicted founder haplotype for Starvation QTL

N\_Tri = Number of RILs with the corresponding predicted founder haplotype for Triglyceride QTL

```
#####  
#####  
# DGRP_Data/:
```

## DGRP\_1.txt

Tab-separated txt file of raw DGRP Starvation Resistance reported in hours for each fly per experimental vial. Average response per sex and line was used in GWA.

Data are presented in Figure 2, Figure S4, Figure S5, Figure S8, Figure S12, used to generate Figure 17, Figure S18, Figure S19.

Column headers:

Mapping.Panel = DGRP, Drosophila Genetic Reference Panel

Trait = StarvationResistance

RAL.ID = Line ID based on RAL identifier

Bloomington.ID = Bloomington stock ID

Sex = (M) Male or (F) Female

VialID = Unique identifier for each experimental vial

FlyID = Unique identifier for individual flies in each vial

LifespanHrs = Lifespan in hours for each individual fly

## DGRP\_2.txt

Tab-separated txt file of DGRP Average Starvation Resistance reported in hours in different environments and on different starvation media types.

Data are presented in Figure S9.

Column headers:

Mapping.Panel = DGRP, Drosophila Genetic Reference Panel  
Trait = StarvationResistance  
RAL.ID = Line ID based on RAL identifier  
Environment = Flies were maintained at 25°C with a 12:12hr L:D cycle (25°C\_12hr) or 23°C with constant light (23°C\_24hr)  
Media = Preservatives or NoPreservatives in the starvation media  
VialID = Unique identifier for each experimental vial  
N = Number of flies per experimental vial  
LifespanHrs = Average lifespan in hours for each experimental vial

DGRP\_3.txt

Tab-separated txt file of DGRP % survival in different environments and on different starvation media types.

Data are presented in Figure S9.

Column headers:

Mapping.Panel = DGRP, Drosophila Genetic Reference Panel  
Trait = StarvationResistance  
RAL.ID = Line ID based on RAL identifier  
Media = Preservatives or NoPreservatives in the starvation media  
Environment = Flies were maintained at 25°C with a 12:12hr L:D cycle (25°C\_12hr) or 23°C with constant light (23°C\_24hr)  
VialID = Unique identifier for each experimental vial  
ScreenpointHrs = Hour intervals at which flies in each vial were counted  
Survival% = Percent of flies in each vial that were alive at each screenpoint

DGRP\_4.txt

Tab-separated txt file of DGRP Starvation Resistance for lines shared between this study, Mackay et al. 2012, and Everman and Morgan 2018.

Data are presented in Figure S8, Figure S10.

Column headers:

RAL.ID = Line ID based on RAL identifier  
Sex = (M) Male or (F) Female  
LifespanHrs\_EvermanetAl.2019 = Mean starvation resistance reported in this study  
LifespanHrs\_MackayEtAl.2012 = Mean starvation resistance reported in Mackay et al. 2012  
LifespanHrs\_Everman&Morgan.2018 = Mean starvation resistance reported in Everman and Morgan 2018

#### DGRP\_5.txt

Tab-separated txt file of bootstrap results of the sign of SNPs across DGRP data collected in this study, Mackay et al. 2012 and Everman and Morgan 2018.

These data are compiled from original bootstrap files; code presented in File S1 is formatted to read each file by DataID.

Data are presented in Figure 8.

Column headers:

%SNPs\_SameSign = Percent of SNPs that have the same sign between studies following bootstrap analysis of random samples of SNPs.

Density = Density calculated from original bootstrap files

Sex = Female or Male

DataID = Dataset ID for plotting in File S1

Comparison = Direction of comparison of SNPs (ThisStudy\_vs\_MackayEtAl2012, ThisStudy\_vs\_Everman&Morgan2018, Everman&Morgan2018\_vs\_ThisStudy, Everman&Morgan2018\_vs\_MackayEtAl2012, MackayEtAl2012\_vs\_ThisStudy, or MackayEtAl2012\_vs\_Everman&Morgan2018)

#### DGRP\_6.txt

Tab-separated txt file of adjusted mean starvation resistance DGRP data collected in this study, Mackay et al. 2012 and Everman and Morgan 2018.

These data are compiled from original GWA-generated files; code presented in File S1 is formatted to read each file by Study.

Data are used in bootstrap analysis.

Column headers:

RAL.ID = Line ID based on RAL identifier

AdjustedMeanStarvationResistance = Adjusted mean phenotype from GWA of each study

Study = Study in which the original starvation resistance data was collected (ThisStudy, MackayEtAl2012, or Everman&Morgan2018)

Sex = (f) female or (m) male

#### DGRP\_7.txt

Comma-separated txt file of SNP frequencies for bootstrap analysis, used in File S1, generated from dgrp.t.txt in code file.

Data are used in bootstrap analysis.

Column headers:

rAF = Reference allele frequency

aAf = Alternate allele frequency

SNP = SNP ID

DGRP\_8.txt

Large space-separated matrix of SNP calls for bootstrap analysis, used in File S1, called as dgrp.t.txt in code file. Data originally available from [dgrp2.gnets.ncsu.edu](http://dgrp2.gnets.ncsu.edu).

Data are used in bootstrap analysis.

Column headers:

id = Line ID based on RAL identifier, formatted "line\_XXX"

\*Remaining Columns: SNP id

Additional Files:

/GWAS\_AVG\_Starvation/

Contains output files for the average starvation resistance calculated for overlapping DGRP lines between this study, Mackay et al. 2012 and Everman and Morgan 2018.

/GWAS\_SJM\_Starvation/

Contains output files for the average starvation resistance from this study.
